# Supplementary material for: Drug-target identification in COVID-19 disease mechanisms using computational systems biology approaches
Source: PubMed Central journal article supplement (PMC10897000; doi:10.3389/fimmu.2023.1282859), 2024-02-13
Supplement: DataSheet_2.pdf [file DataSheet_2.pdf]

## Supplementary Material for

**Title: Drug-Target identification in COVID-19 disease mechanisms using computational systems biology approaches**  
**DOI: 10.3389/fimmu.2023.1282859**

Anna Niarakis *et al.*

\*Corresponding author. Email: [anna.niarakis@inria.fr](mailto:anna.niarakis@inria.fr)

### **This PDF file includes:**

Figs. S1 to S17

Tables S1 to S17 with the exception of Tables S8 and S9 that are provided in a separate excel file.

**Fig. S1.**

A) Carnival network of mechanistic hypotheses connecting the top 10 deregulated kinases with the top 30 deregulated TFs. Kinases are represented as hexagon-shaped nodes, TFs as rounded rectangles, and intermediary signaling proteins as elliptical nodes. Up-regulated nodes are indicated in red while down-regulated nodes are colored in blue. Activatory reactions are indicated with arrow-shaped edges whereas inhibitory ones are represented by T-shaped edges. Bold outlines denote proteins already present in the COVID-19 Disease Map. Blue outlines denote PAMPs and Interferon-1 pathway members, red outlines are ER stress pathway members and purple outlines indicate TGFbeta pathway members of the pathways manually curated by the COVID-19 Disease Maps community. B) Highlighted C19DMap diagrams containing deregulated kinases and TFs are shown in dark pink. Users can click on the highlighted boxes and enter the diagram.

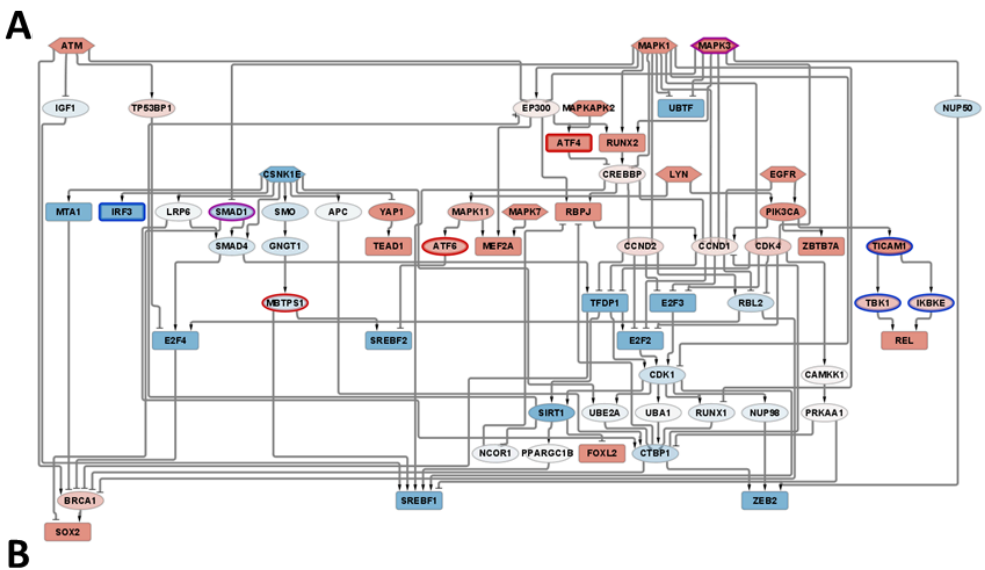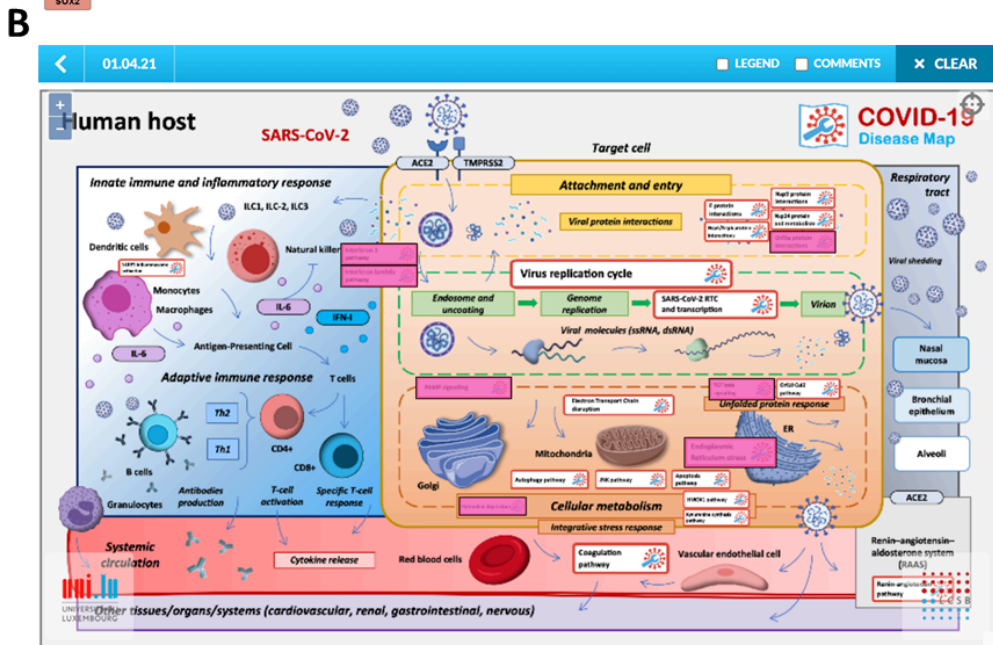

### Fig. S2.

Overlap of (a) DEGs and (b) TFs between SARS-CoV-2-infected NHBE and A549 cells by LAMP and GO Enrichment analysis.

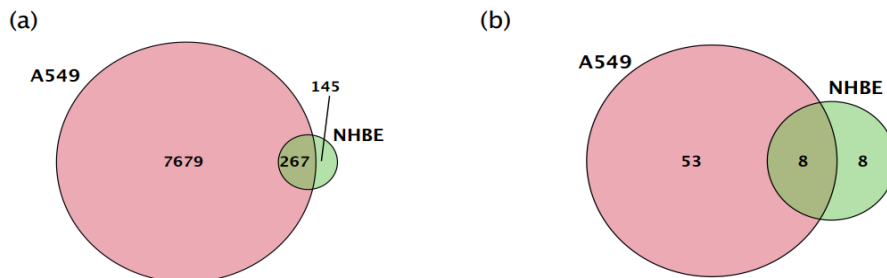

### Fig. S3.

(A) Venn diagram of the combined pathway gene sets from COVID-19 Disease Map, WikiPathways, and Reactome with 1,840 human pathways containing 12,037 unique genes. (B) Over-representation analysis (criteria: absolute fold change > 1.5 and p-value < 0.05) revealed 11 pathways altered in both cell lines. WP = WikiPathways

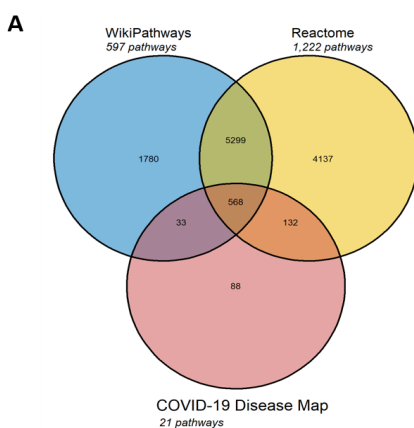

| No | Altered pathways in NHBE and A549 cell lines after SARS-CoV-2 infection  |
|----|--------------------------------------------------------------------------|
| 1  | WP_Photodynamic therapy-induced NF-kB survival signaling                 |
| 2  | REACTOME_INTERLEUKIN_10_SIGNALING                                        |
| 3  | WP_Selenium micronutrient network                                        |
| 4  | REACTOME_INTERLEUKIN_4_AND_INTERLEUKIN_13_SIGNALING                      |
| 5  | WP_Immune response to tuberculosis                                       |
| 6  | WP_Folate metabolism                                                     |
| 7  | WP_IL1 and megakaryocytes in obesity                                     |
| 8  | WP_Antiviral and anti-inflammatory effects of Nrf2 on SARS-CoV-2 pathway |
| 9  | WP_Nuclear receptors meta-pathway                                        |
| 10 | REACTOME_EXTRACELLULAR_MATRIX_ORGANIZATION                               |
| 11 | WP_Glucocorticoid receptor pathway                                       |

**Fig. S4.**

C19DMap (DM), WikiPathways (WP) and Reactome pathways significantly enriched for DEGs in SARS-CoV-2-infected NHBE cells.

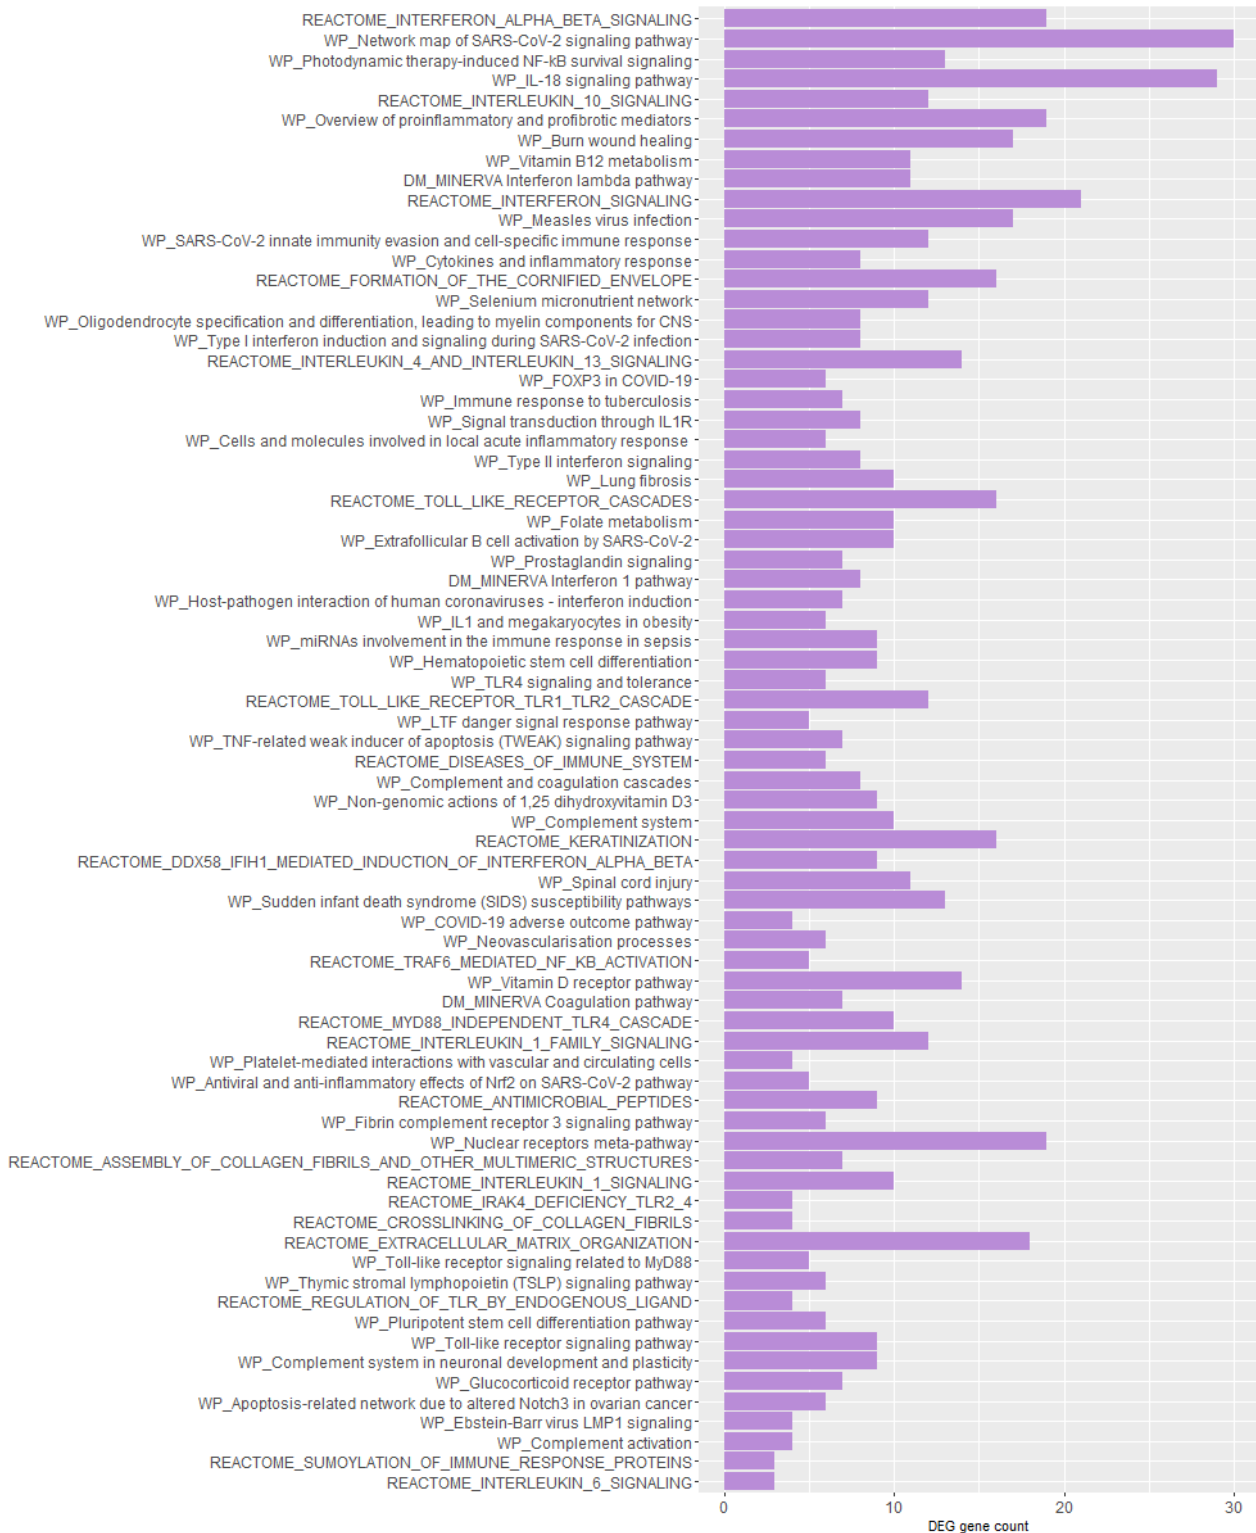

**Fig. S5.**

C19DMap (DM), WikiPathways (WP) and Reactome pathways significantly enriched for DEGs in SARS-CoV-2-infected A549 cells.

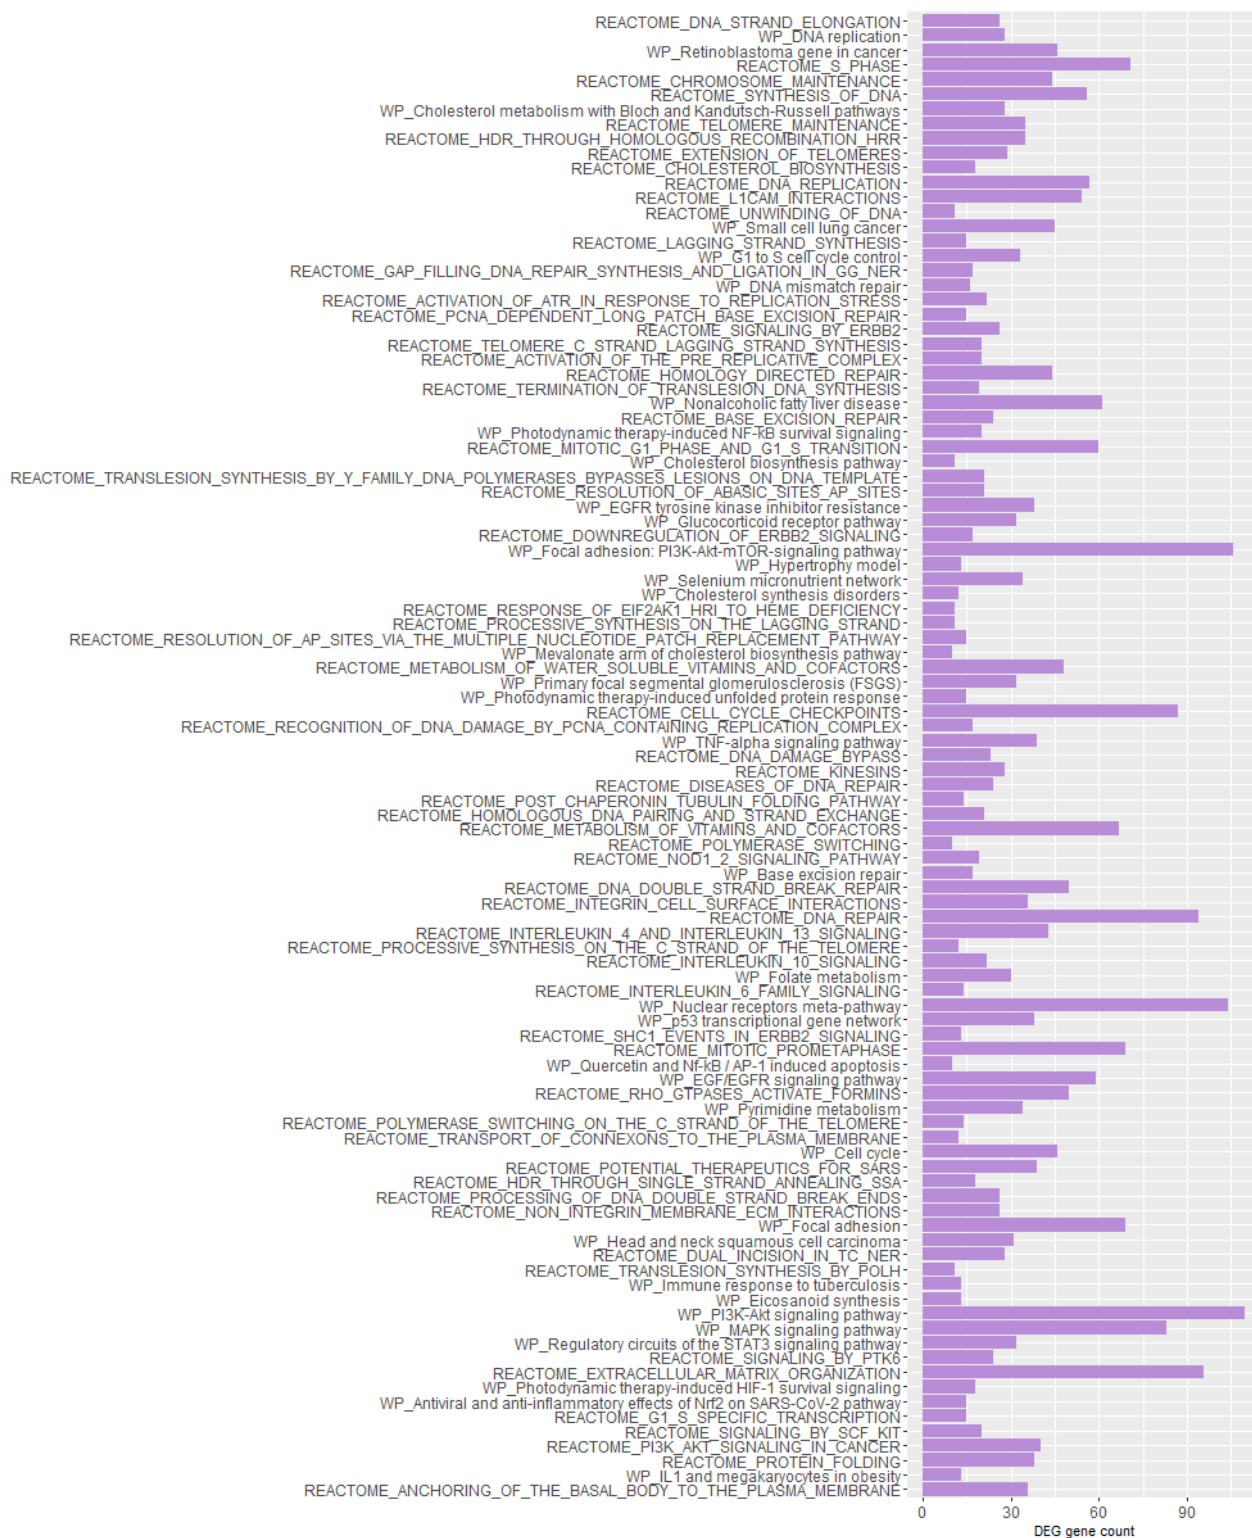

**Fig. S6.**

A) UMAP of both whole data sets (GSE145926 and GSE160664), where all cell types were highlighted and reported. B) Overlap of overexpressed (positive) DEGs among all detected lung epithelial cell types of COVID-19 patients relative to healthy controls.

**A)**

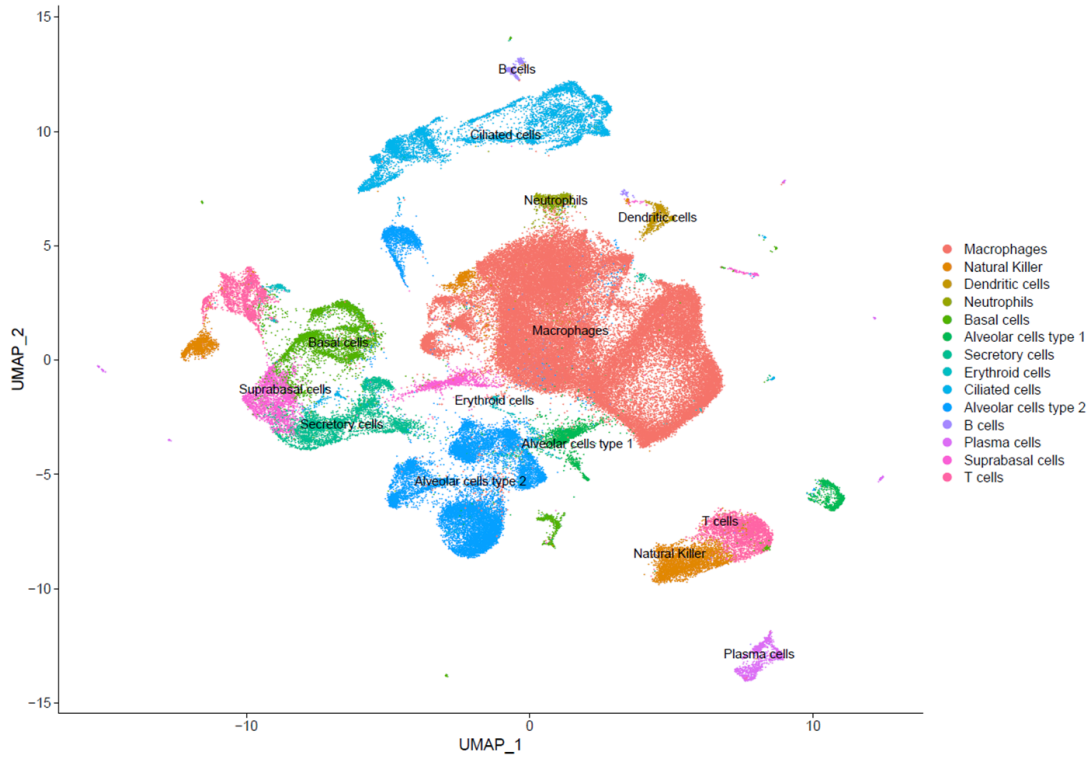

**B)**

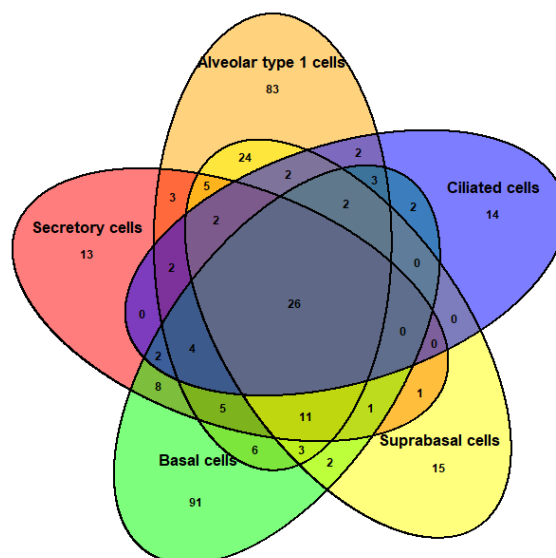

**Fig. S7.**

The Boolean network obtained after the processing of the CellDesigner XML file of the Type I IFN of the C19DMap repository with CaSQ 9.0.2. After post-processing, the final version of the model contains 121 nodes and 190 edges. Colour code: Red: Viral proteins, Turquoise: Drugs, Pink: host cell inputs, Purple: Host cell proteins, Light blue: Phenotypes of interest

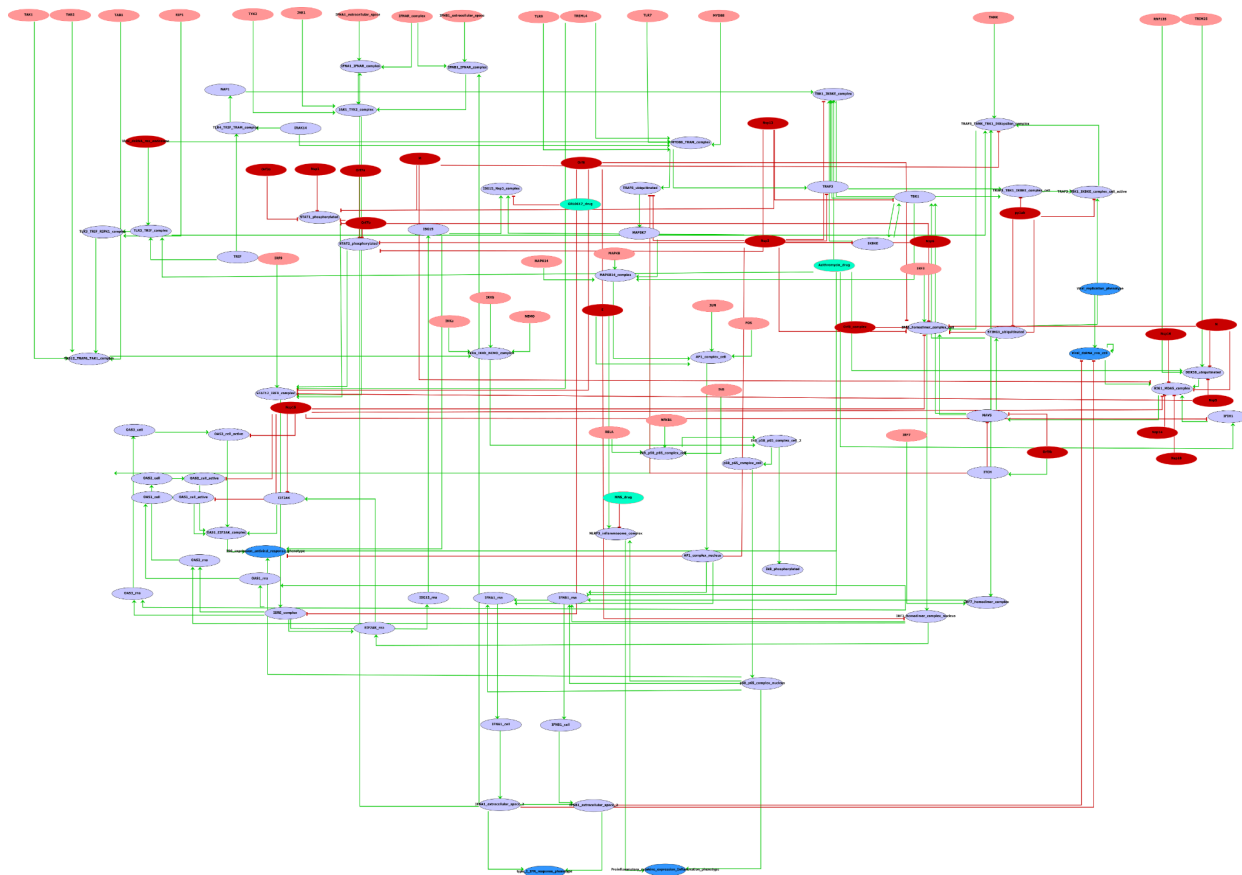

**Fig. S8.**

Example of the in-silico simulation in Cell Collective. The orange line presents the inflammation activity level. The left graph presents the increase of inflammation phenotype when viral components are activated after the time step 20. The right graph presents the decrease of inflammation phenotype in the presence of viral components upon addition of the GRL0617, Azithromycin, and MNS drugs to the system (at time step 20).

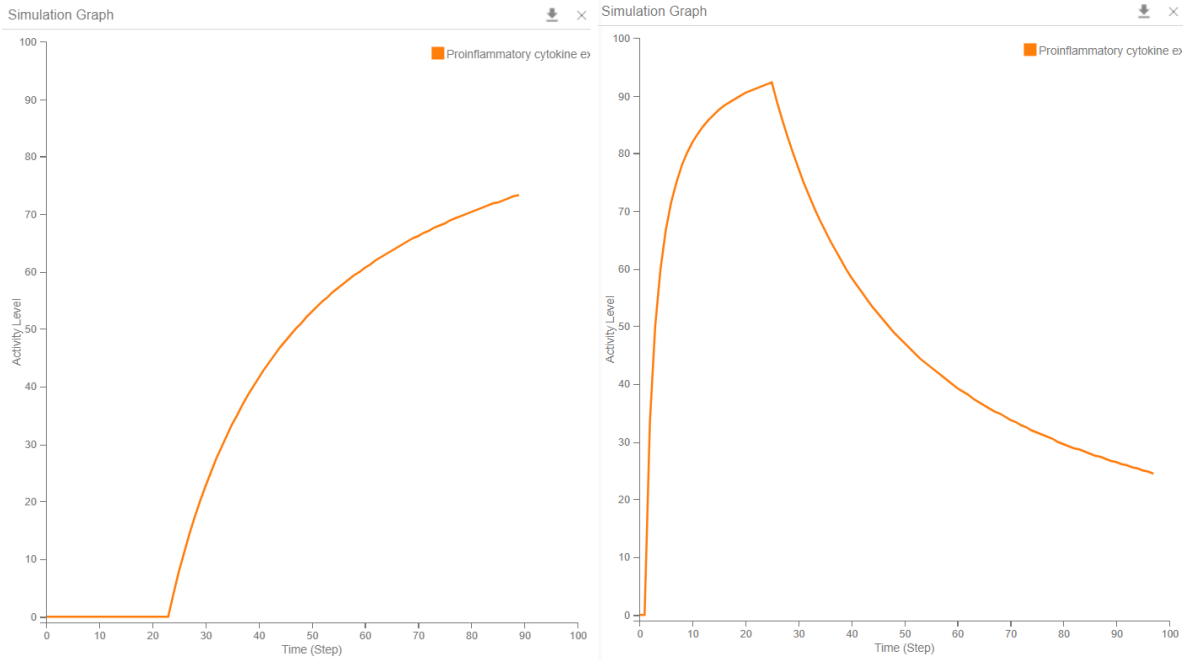



**Fig. S9.**

Sensitivity analysis showing the association between inputs (external components) and outputs (phenotypes). A) All the inputs, except drugs, were active. Inflammation phenotype has the highest positive association with protein E. The 'ISG expression antiviral response phenotype' has the highest association (negative) with Nsp3. B) All the inputs were active. The 'Inflammation phenotype' has the highest positive association with viral protein E and negative association with the MNS drug. An increase in viral proteins leads to higher inflammation. In contrast, the increase in MNS reduces inflammation. PCC is a partial correlation coefficient measuring the strength of association between external components and output variables.

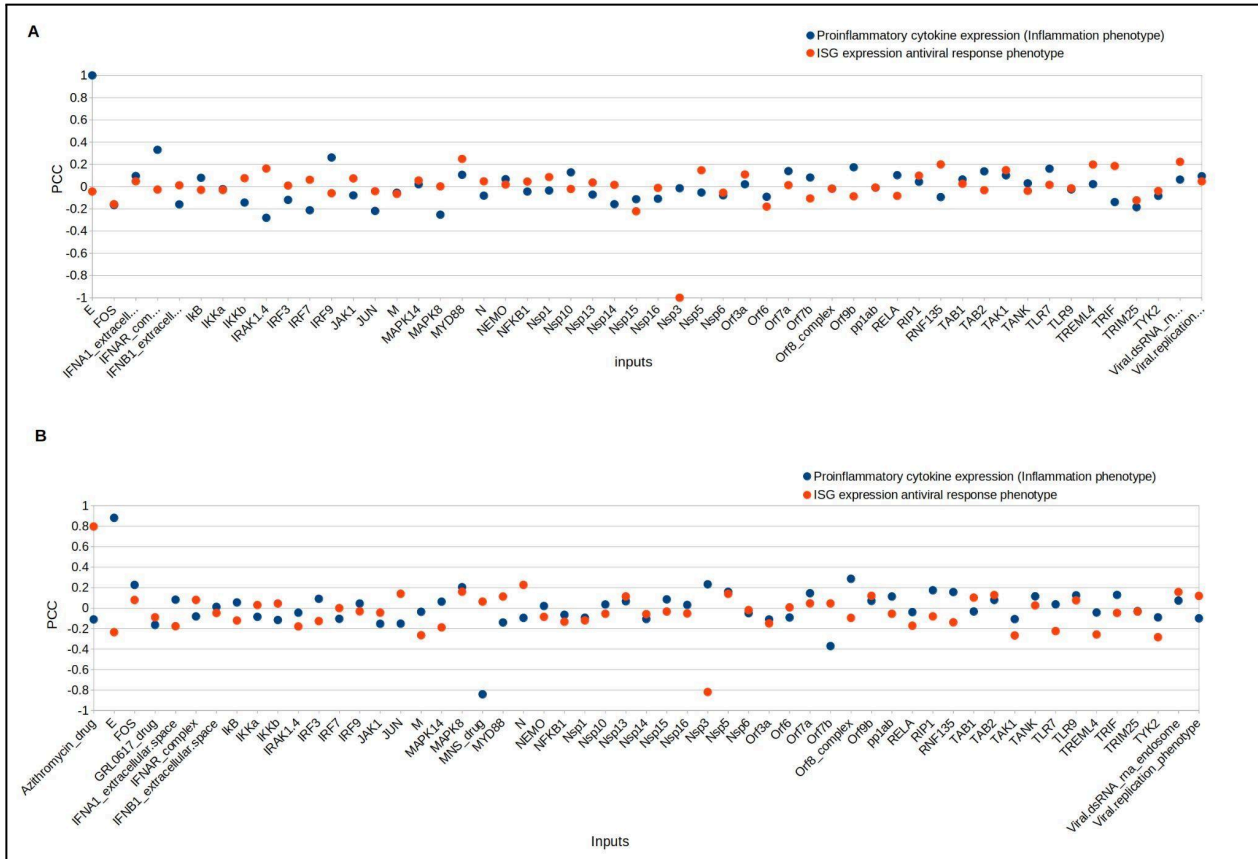

**Fig. S10.**

The result of input propagation can be visualized in the heatmap where columns represent components of the system and rows represent the 8 selected input conditions. A white cell denotes that the corresponding component is fixed at value 0 in this input condition. Likewise, a blue cell denotes that it is fixed at 1. Red cells denote components which are not fixed by input propagation.

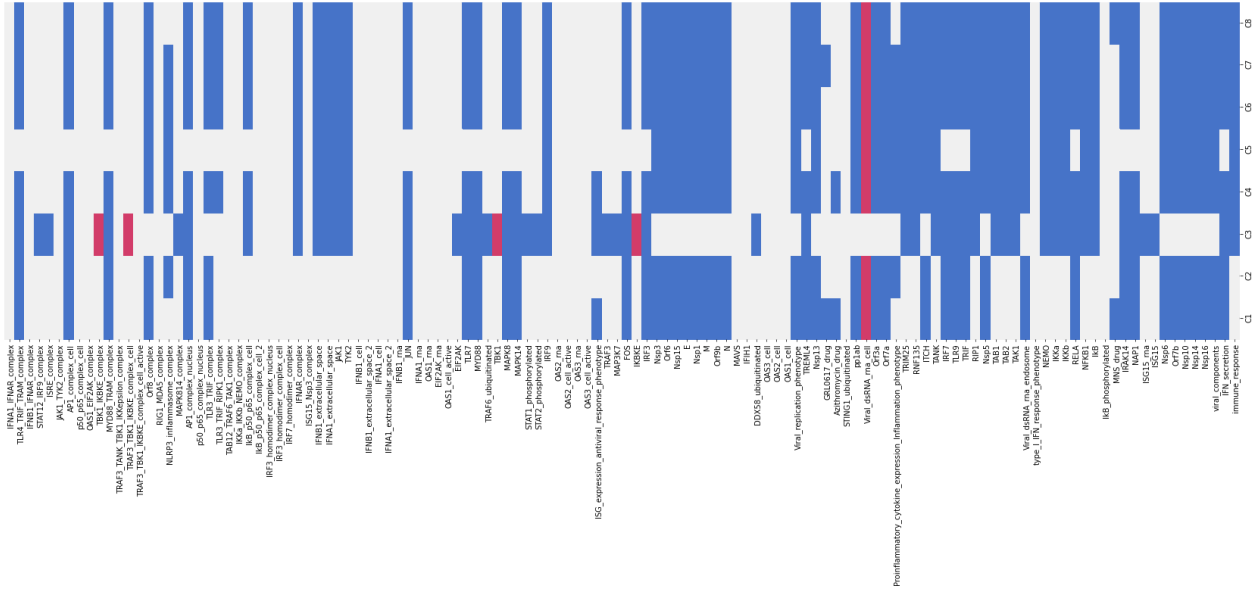

**Fig. S11.**

Close-up comparison of the effect of p38 knockout (KO) on the phenotype scores of the macrophages model personalized for patient C141. Phenotype scores of the recruitment of immune cells were gathered for the wild-type C141 (red) and the p38 knockout C141 MaBoSS simulation (blue).

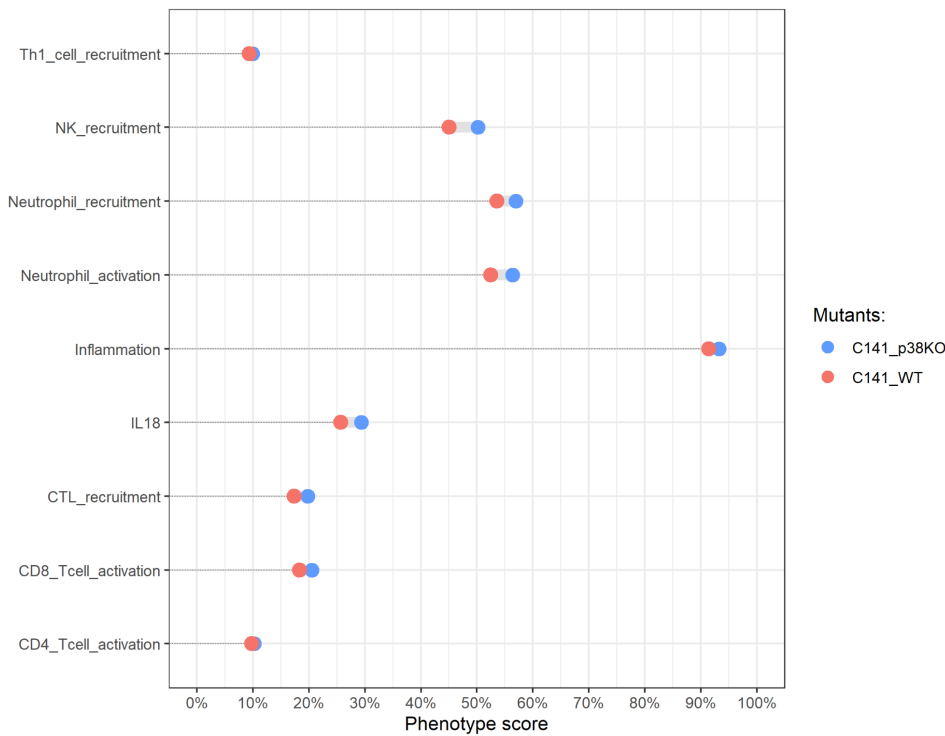

**Fig. S12.**

High-throughput study of all the KO mutants of the Boolean models considered in the multiscale simulations. The resulting scores for the relevant phenotypes apoptosis of respiratory epithelial cells (A) and the recruitment of immune cells by macrophages (B) were compared to the wild-type values (red bars). The green bar represents the score of FADD knockout, and the blue bar represents the score of p38 knockout.

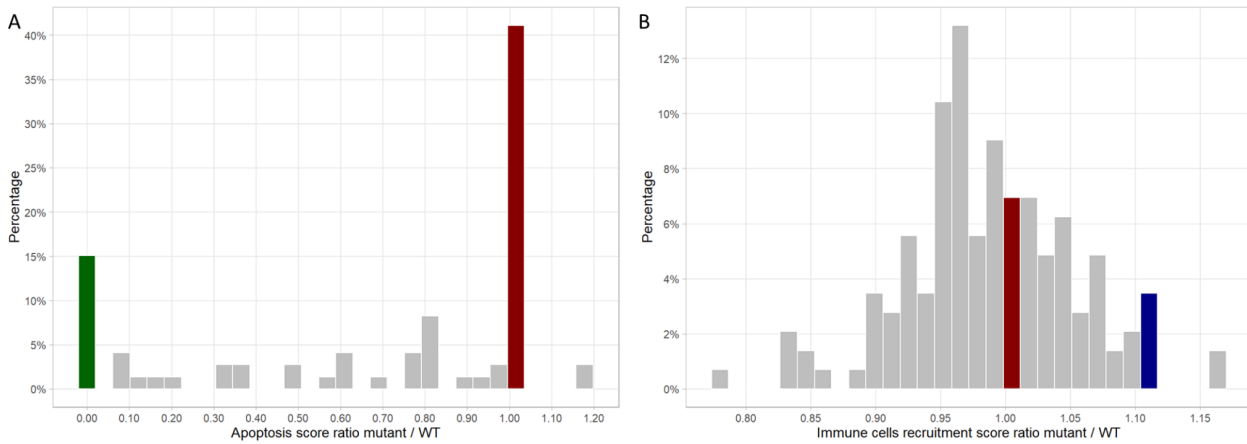

**Fig. S13.**

Simulation of wild type and mutants using PhysiBoSS. Our framework can simulate wild-type respiratory epithelial cell state (A) and wild-type immune cell recruitment (B) to study the effect of knockouts such as FADD in respiratory epithelial cell apoptosis (C) or p38 in immune cell recruitment (D).

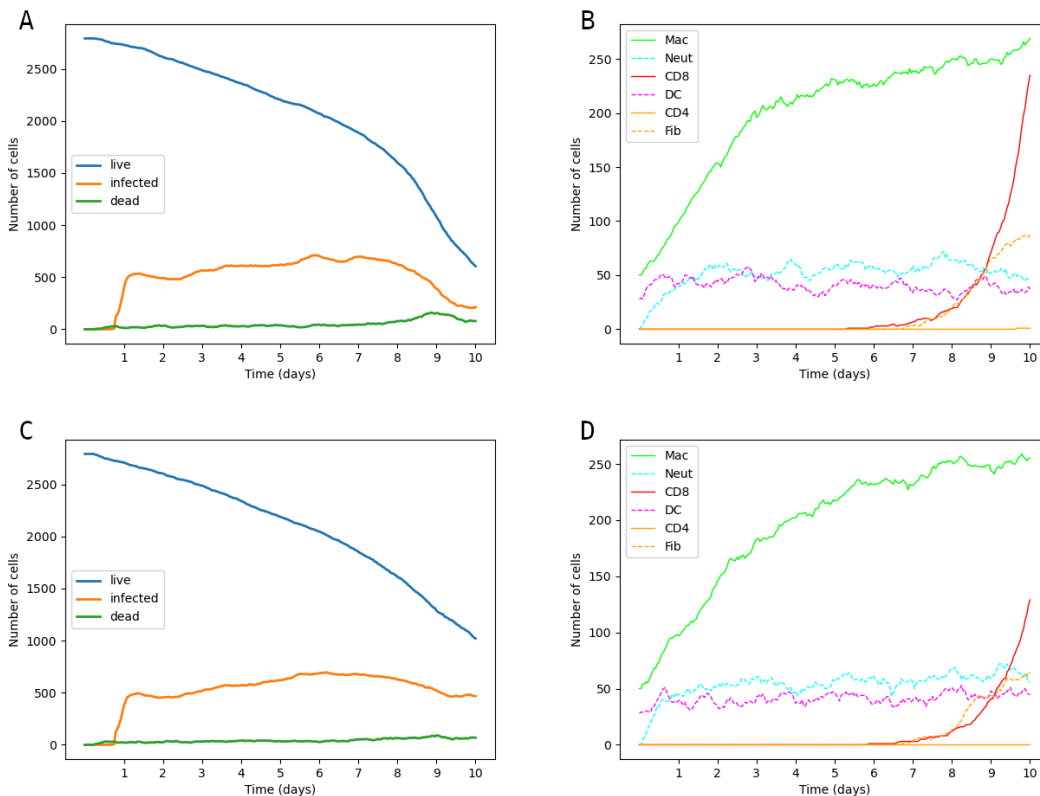

**Fig. S14.**

Drug targets derived from the multimodal omics data analysis and corresponding disease mechanisms in C19DMap repository.

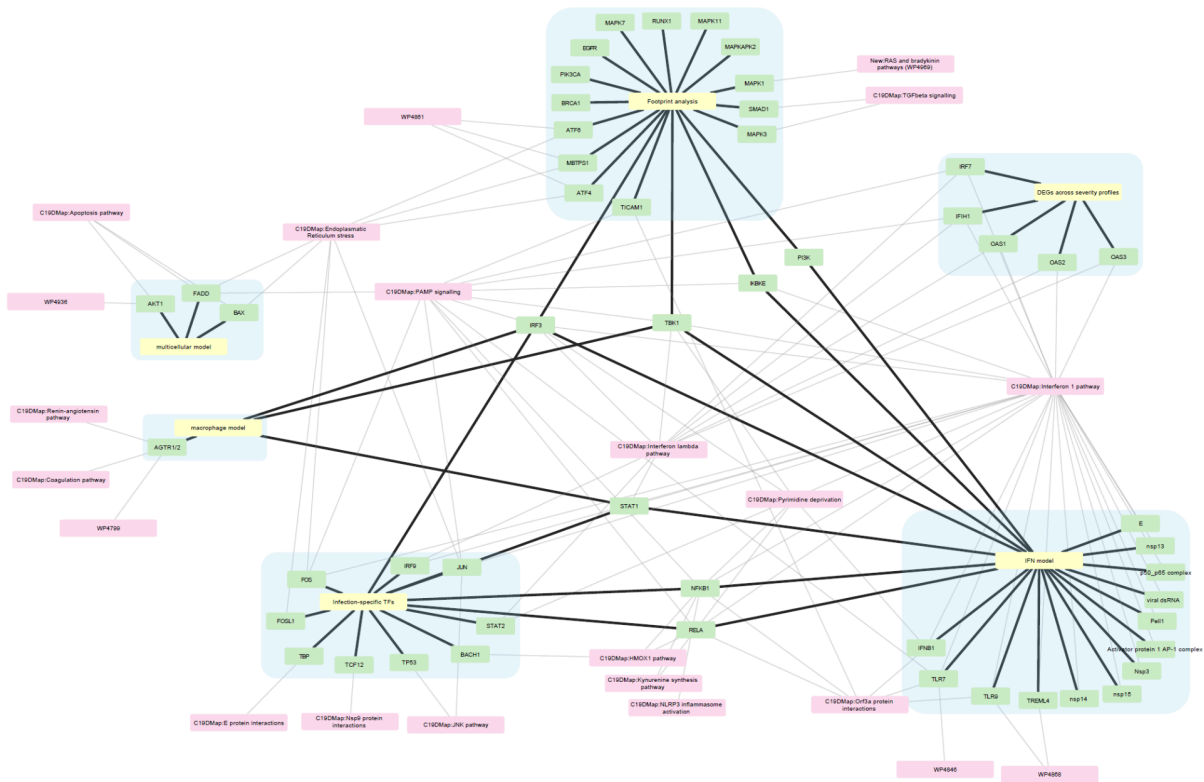

**Fig. S15.**

CAP score across different populations and stratified by sex. The heatmap displays the CAP score for each gene of the 79 genes computed for each different population and sex. The populations tested are afr: African/African American, eas: East Asian, asj: Ashkenazi Jewish, nfe: non-Finnish European, fin: Finnish European, sas: South Asian, amr: Latino/Admixed American.

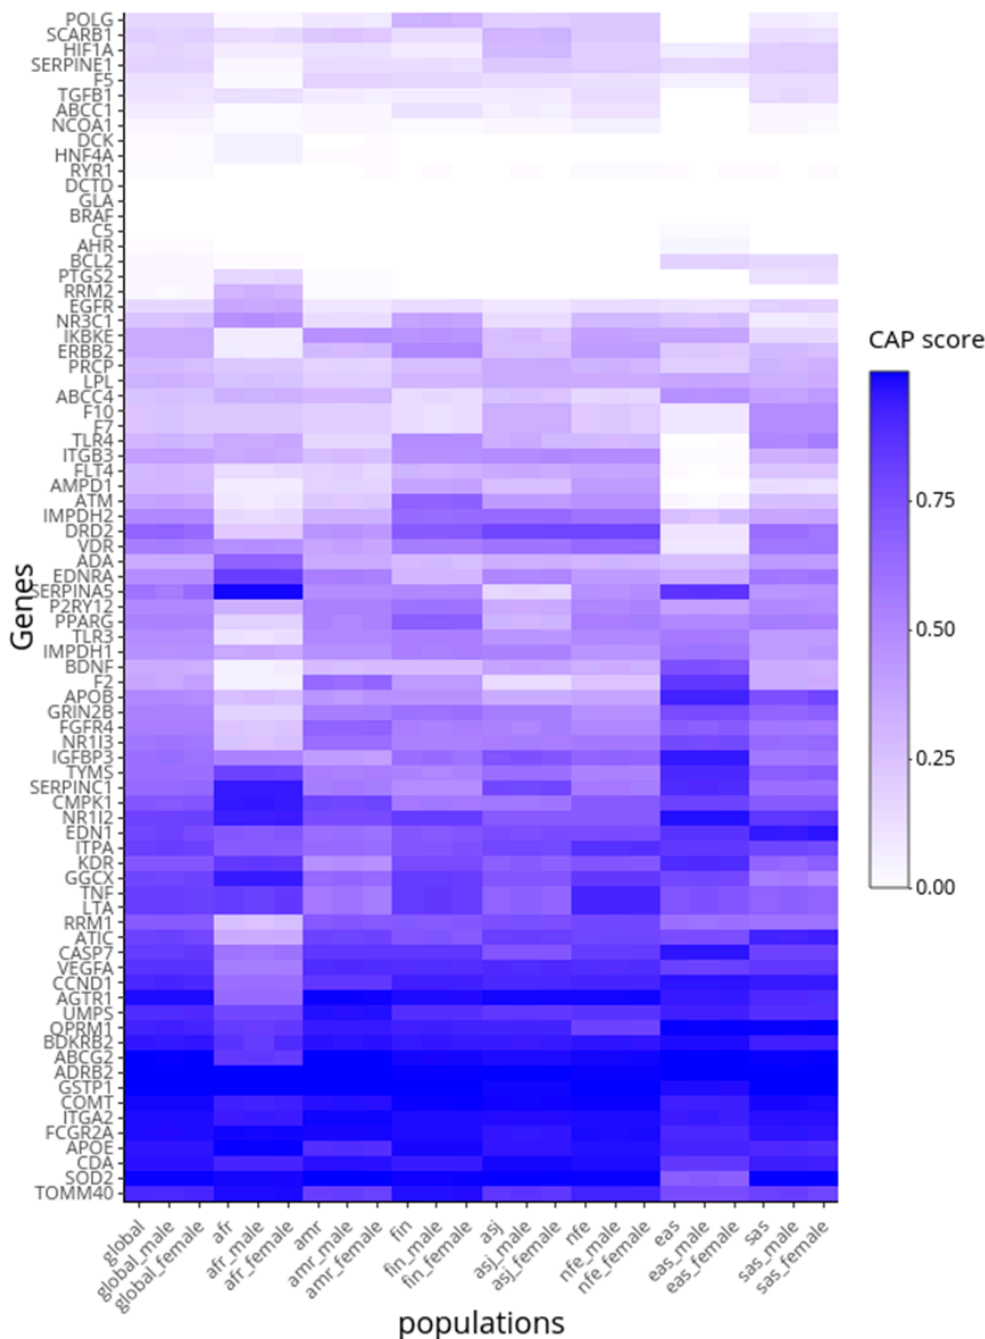

**Fig. S16.**

DRP score for the set of 52 drugs was computed for each population and sex. The populations tested are afr: African/African American, eas: East Asian, asj: Ashkenazi Jewish, nfe: non-Finnish European, fin: Finnish European, sas: South Asian, amr: Latino/Admixed American.

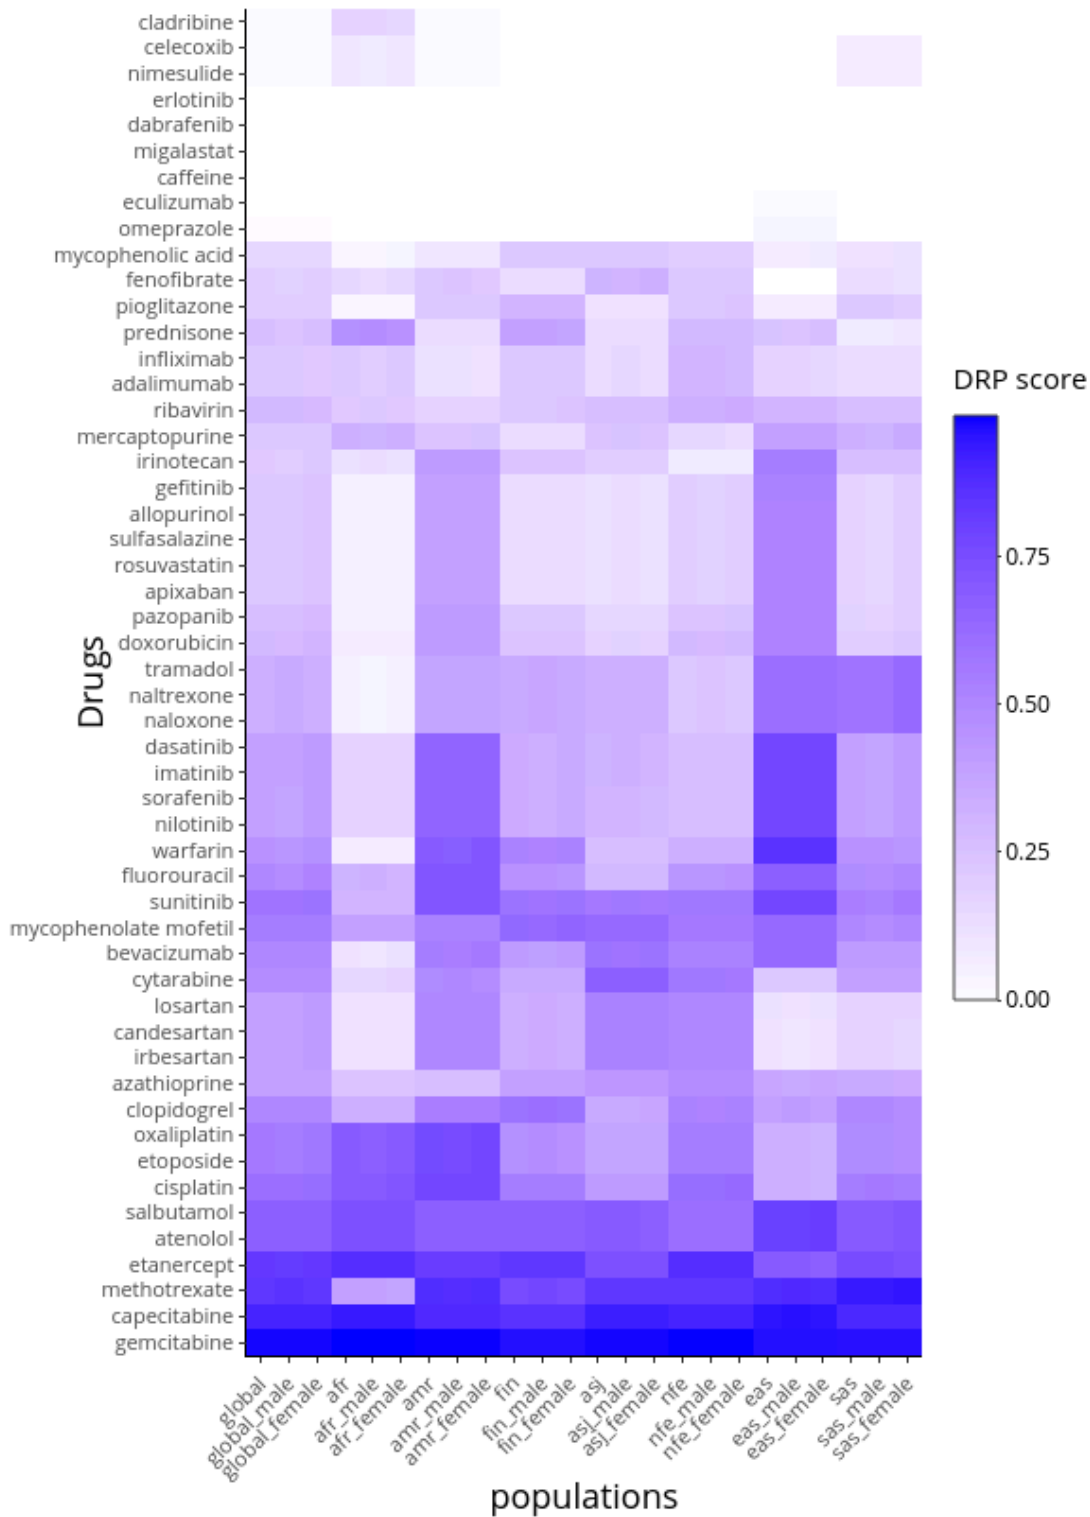

**Fig. S17.**

C19DM-Neo4j data model: an example of a protein phosphorylation process. For illustration purposes, we show a single process from the Endoplasmic Reticulum Stress map: DDIT3 phosphorylation activated by MAPK14. Nodes represent macromolecules (yellow), processes (blue) and state variables (red). Edges represent relationships: CONSUMES (reactant-process relationship), PRODUCES (process-product), CATALYZES (process-catalyzer), HAS\_STATE\_VARIABLE (macromolecule-state\_variable). Properties of nodes are shown as text near nodes. Entries of the HGNC database and PubMed IDs for supporting references. The C19DM-Neo4j database and the Cypher query language offer flexible querying of the COVID-19

Disease                      Map                      resource.

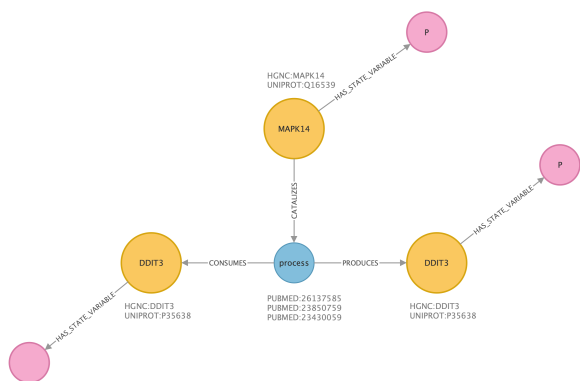

```

Cypher query example: process phosphorylation
MATCH path1 = (product_sv:StateVariable) <- [:HAS_STATE_VARIABLE] -
(product:Macromolecule) <- [:PRODUCES] - (process:Process) -
[:CONSUMES] -> (reactant:Macromolecule) - [:HAS_STATE_VARIABLE] ->
(reactant_sv:StateVariable)
WHERE reactant.label = product.label AND reactant_sv.value IS NULL AND
product_sv.value = "P" AND (product_sv.variable IS NULL AND
reactant_sv.variable IS NULL AND product_sv.order = reactant_sv.order OR
product_sv.variable = reactant_sv.variable)
OPTIONAL MATCH path2 = (catalyzer:Macromolecule) - [:CATALYZES] ->
(process)
OPTIONAL MATCH path3 = (catalyzer) - [:HAS_STATE_VARIABLE] ->
(catalyzer_sv:StateVariable)
RETURN path1, path2, path3
  
```

**Table S1.**

Highlighted C19DMap diagrams, including deregulated kinases and TFs, identified in A549 cells using the footprint analysis.

| A549 cells                   |                           |
|------------------------------|---------------------------|
| C19DMap diagram              | hgnc_carnival             |
| Interferon 1 pathway         | IRF3, TBK1, IKBKE         |
| TGFbeta signaling            | MAPK3, SMAD1              |
| PAMP signaling               | TICAM1, IKBKE, IRF3, TBK1 |
| Pyrimidine deprivation       | IRF3, TBK1                |
| Orf3a protein interactions   | TICAM1                    |
| Endoplasmic Reticulum stress | ATF6, ATF4, MBTPS1        |
| Interferon lambda pathway    | IRF3, TBK1                |

**Table S2.**

TFs that regulate DEGs in SARS-CoV-2-infected NHBE and A549 cells; “Common” indicates TFs detected in both cell types; TFs in red are those present in the C19DMap.

| A549 only |        |       | Common | NHBE only | TFs present in C19DMap | C19DMap pathways                                                    |
|-----------|--------|-------|--------|-----------|------------------------|---------------------------------------------------------------------|
| E2F4      | MYC    | E2F1  | TP53   | STAT2     | IRF3                   | Interferon 1 pathway<br>PAMP signaling<br>Interferon lambda pathway |
| THAP11    | ZNF263 | MAZ   | STAT1  | REL       | BACH1                  | HMOX1 pathway                                                       |
| ZBTB7A    | TEAD1  | KLF5  | FOS    | FOSL1     | TBP                    | E protein interaction<br>TGFbeta signaling                          |
| NFYB      | MEF2A  | FOXP1 | ESR1   | IRF9      | TCF12                  | Nsp9 protein interactions                                           |
| AR        | MXI1   | TBP   | RELA   | PPARA     | TP53                   | JNK pathway                                                         |
| IRF3      | KLF9   | E2F6  | NFKB1  | CEBPB     | STAT1                  | Interferon 1 pathway<br>Interferon lambda                           |
| SREBF1    | MAX    | ATF3  | KLF6   | RBPJ      | FOS                    | Interferon 1 pathway<br>PAMP signaling                              |



|         |        |       |     |       |       |                                                                                                                                                 |
|---------|--------|-------|-----|-------|-------|-------------------------------------------------------------------------------------------------------------------------------------------------|
| SP1     | YY1    | GABPA | JUN | GATA3 | RELA  | Interferon 1 pathway<br>PAMP signaling<br>Pyrimidine deprivation<br>Orf3a protein interactions<br>HMOX1 pathway<br>Kynurenine synthesis pathway |
| SNAPC4  | NRF1   | NR2C2 | -   | -     | NFKB1 | Interferon 1 pathway<br>PAMP signaling<br>Pyrimidine deprivation<br>Orf3a protein interactions<br>HMOX1 pathway<br>Kynurenine synthesis pathway |
| RUNX2   | PRDM14 | SIX5  | -   | -     | JUN   | Interferon 1 pathway<br>JNK pathway<br>PAMP signaling                                                                                           |
| MYCN    | ZBED1  | TEAD4 | -   | -     | STAT2 | Interferon 1 pathway<br>Interferon lambda pathway                                                                                               |
| BACH1   | FOXP2  | TFDP1 | -   | -     | IRF9  | Interferon 1 pathway<br>Interferon lambda pathway                                                                                               |
| THAP1   | CUX1   | TCF12 | -   | -     | FOSL1 | Endoplasmic reticulum stress                                                                                                                    |
| EBF1    | ZNF143 | MYBL2 | -   | -     |       |                                                                                                                                                 |
| FOXO3   | HBP1   | SP2   | -   | -     |       |                                                                                                                                                 |
| KLF13   | BCL6   | HIF1A | -   | -     |       |                                                                                                                                                 |
| ZEB2    | MBD1   | ZFX   | -   | -     |       |                                                                                                                                                 |
| CREB3L1 | ARID2  | -     | -   | -     | -     | -                                                                                                                                               |

**Table S3.**

Differential cell type-specific gene expression between COVID-19 patients and healthy controls. COVID-19 cell sample size (%) represents the absolute count and percentage of lung epithelium cell types in COVID-19 patients-derived samples; Overexpressed DEGs and Downregulated DEGs represent numbers of overexpressed and downregulated DEGs, respectively, in COVID-19 patients vs. healthy controls. 26 COVID-19 overexpressed DEGs were shared between all lung epithelium cell types.

|                       | COVID-19 cell sample size (%) | Overexpressed DEGs | Downexpressed DEGs |
|-----------------------|-------------------------------|--------------------|--------------------|
| <b>Ciliated cells</b> | 952 (13.5%)                   | 61                 | 93                 |

|                              |             |     |     |
|------------------------------|-------------|-----|-----|
| <b>Alveolar cells type 1</b> | 139 (5.7%)  | 183 | 81  |
| <b>Basal cells</b>           | 469 (10.1%) | 166 | 77  |
| <b>Secretory cells</b>       | 237 (6%)    | 83  | 42  |
| <b>Suprabasal cells</b>      | 958 (27.3%) | 94  | 116 |

**Table S4.**

26 DEGs shared among all detected lung epithelial cell types. The genes in red belong to Type I interferon induction and signalling pathway in C19DMap (WikPathway WP4868).

|             |              |
|-------------|--------------|
| ATP6V0C     | MX1          |
| <b>OAS1</b> | SRGN         |
| MX2         | IFIT2        |
| IFI44L      | IFIT3        |
| <b>OAS3</b> | IFI44        |
| EPSTI1      | GBP1         |
| IFITM1      | CCL2         |
| <b>OAS2</b> | RSAD2        |
| XAF1        | <b>IRF7</b>  |
| IFIT1       | MT-ATP8      |
| ISG15       | NME2         |
| SAMD9       | IFI6         |
| TAOK1       | <b>STAT1</b> |

**Table S5.**

Significant pathways-circuits activity values after Wilcoxon test comparison between 430 SARS-CoV-2-infected and 54 non-infected individuals. The results were obtained by running CoV-Hipathia web tool with GSE152075 dataset.

| <b>Pathway:<br/>Effector Circuitname</b>                | <b>UP/DOWN</b> | <b>statistic</b> | <b>FDR-p.value</b> | <b>Fold Change</b> | <b>logFC</b>    |
|---------------------------------------------------------|----------------|------------------|--------------------|--------------------|-----------------|
| Nsp9 protein interactions:<br>EIF4H                     | DOWN           | -7.56E+00        | 6.09E-12           | 6.29E-01           | -6.68E-01       |
| <b>Interferon lambda pathway:<br/>STAT1,STAT2,STAT3</b> | <b>UP</b>      | <b>7.16E+00</b>  | <b>5.77E-11</b>    | <b>2.01E+00</b>    | <b>1.01E+00</b> |

|                                                       |           |                 |                 |                 |                 |
|-------------------------------------------------------|-----------|-----------------|-----------------|-----------------|-----------------|
| <b>Interferon 1 pathway:<br/>OAS1,OAS2,OAS3</b>       | <b>UP</b> | <b>6.89E+00</b> | <b>2.77E-10</b> | <b>2.88E+00</b> | <b>1.53E+00</b> |
| Nsp9 protein interactions:<br>MYCBP2                  | UP        | 6.57E+00        | 1.62E-09        | 1.26E+00        | 3.32E-01        |
| Nsp9 protein interactions:<br>COMT                    | DOWN      | -6.54E+00       | 1.62E-09        | 4.13E-01        | -1.28E+00       |
| Nsp9 protein interactions:<br>DCAF7                   | UP        | 5.62E+00        | 4.65E-07        | 1.23E+00        | 2.93E-01        |
| Nsp9 protein interactions:<br>CYB5R3                  | DOWN      | -5.57E+00       | 5.35E-07        | 7.47E-01        | -4.20E-01       |
| JNK pathway: JUN,JUND                                 | DOWN      | -5.47E+00       | 8.14E-07        | 5.83E-01        | -7.78E-01       |
| Nsp9 protein interactions:<br>MIB1,DLL1               | DOWN      | -4.83E+00       | 1.38E-06        | 1.31E-01        | -2.93E+00       |
| E protein interactions:<br>STOML3,ASIC1               | DOWN      | -5.12E+00       | 2.10E-06        | 3.48E-01        | -1.52E+00       |
| <b>Renin-angiotensin pathway:<br/>LNPEP</b>           | <b>UP</b> | <b>4.87E+00</b> | <b>1.45E-05</b> | <b>1.25E+00</b> | <b>3.23E-01</b> |
| Nsp9 protein interactions:<br>AP2M1                   | DOWN      | -4.56E+00       | 6.26E-05        | 8.04E-01        | -3.14E-01       |
| E protein interactions:<br>CCNT1,CDK9                 | DOWN      | -4.52E+00       | 6.73E-05        | 5.00E-01        | -1.00E+00       |
| <b>Interferon 1 pathway:<br/>ISG15</b>                | <b>UP</b> | <b>4.26E+00</b> | <b>1.81E-04</b> | <b>2.55E+00</b> | <b>1.35E+00</b> |
| Kynurenine synthesis<br>pathway: AHR                  | UP        | 4.28E+00        | 1.81E-04        | 1.18E+00        | 2.35E-01        |
| Nsp9 protein interactions:<br>GFER                    | DOWN      | -4.10E+00       | 1.98E-04        | 4.41E-01        | -1.18E+00       |
| Nsp9 protein interactions:<br>IMPDH2                  | DOWN      | -4.13E+00       | 3.10E-04        | 6.98E-01        | -5.19E-01       |
| Renin-angiotensin pathway:<br>MAS1                    | UP        | 4.06E+00        | 3.50E-04        | 2.45E+00        | 1.29E+00        |
| Nsp4 and Nsp6 protein<br>interactions: Nsp3:Nsp4:Nsp6 | DOWN      | -3.73E+00       | 5.78E-04        | 5.55E-01        | -8.49E-01       |
| E protein interactions:<br>CRB3,PATJ,MPP5             | DOWN      | -3.69E+00       | 5.88E-04        | 4.71E-01        | -1.09E+00       |

|                                                                     |      |           |          |          |           |
|---------------------------------------------------------------------|------|-----------|----------|----------|-----------|
| Coagulation pathway: MAS1                                           | UP   | 3.85E+00  | 5.88E-04 | 1.28E+01 | 3.68E+00  |
| HMOX1 pathway:<br>RBX1,KEAP1,CUL3                                   | DOWN | -3.87E+00 | 6.33E-04 | 2.73E-01 | -1.87E+00 |
| Orf3a protein interactions:<br>HMOX1,ALG5,ARL6IP6                   | DOWN | -3.46E+00 | 7.28E-04 | 2.45E-01 | -2.03E+00 |
| Nsp4 and Nsp6 protein<br>interactions: DNAJC11                      | DOWN | -3.63E+00 | 8.61E-04 | 5.67E-01 | -8.19E-01 |
| Nsp9 protein interactions:<br>SEPSECS                               | UP   | 3.65E+00  | 1.48E-03 | 1.66E+00 | 7.35E-01  |
| Nsp4 and Nsp6 protein<br>interactions:<br>TIMM29,TIMM22,TIMM10<br>B | DOWN | -3.24E+00 | 1.70E-03 | 3.85E-01 | -1.38E+00 |
| Nsp4 and Nsp6 protein<br>interactions: IDE                          | DOWN | -3.44E+00 | 1.77E-03 | 5.59E-01 | -8.40E-01 |
| Nsp9 protein interactions:<br>MRPS5,MRPS2                           | DOWN | -3.50E+00 | 2.13E-03 | 6.66E-01 | -5.86E-01 |
| Nsp9 protein interactions:<br>FBLN5,LOXL1                           | DOWN | -3.22E+00 | 2.68E-03 | 3.35E-01 | -1.58E+00 |
| Apoptosis pathway: CASP7                                            | UP   | 3.37E+00  | 3.66E-03 | 1.34E+00 | 4.22E-01  |
| Nsp9 protein interactions:<br>COPS6,EDN1                            | DOWN | -3.00E+00 | 4.52E-03 | 4.26E-01 | -1.23E+00 |
| Nsp9 protein interactions:<br>POLR2A,GTF2F2,POLR2G                  | DOWN | -2.99E+00 | 9.43E-03 | 5.54E-01 | -8.53E-01 |
| Nsp9 protein interactions:<br>BAG6,EDN1                             | DOWN | -2.68E+00 | 1.51E-02 | 8.07E-01 | -3.10E-01 |
| Nsp9 protein interactions:<br>AP2A2                                 | DOWN | -2.74E+00 | 2.65E-02 | 8.02E-01 | -3.18E-01 |
| Nsp9 protein interactions:<br>RALA                                  | UP   | 2.70E+00  | 2.84E-02 | 1.31E+00 | 3.87E-01  |
| Nsp9 protein interactions:<br>SBNO1                                 | UP   | 2.64E+00  | 3.18E-02 | 1.06E+00 | 8.03E-02  |
| Nsp9 protein interactions:<br>DDX10                                 | UP   | 2.64E+00  | 3.18E-02 | 1.28E+00 | 3.53E-01  |

|                                                 |      |           |          |          |           |
|-------------------------------------------------|------|-----------|----------|----------|-----------|
| Nsp9 protein interactions:<br>UBQLN4,EDN1       | DOWN | -2.37E+00 | 3.18E-02 | 9.24E-01 | -1.13E-01 |
| PAMP signalling: ITCH                           | UP   | 2.62E+00  | 3.26E-02 | 1.08E+00 | 1.18E-01  |
| Nsp9 protein interactions:<br>ZNF503            | DOWN | -2.47E+00 | 3.39E-02 | 6.31E-01 | -6.63E-01 |
| Nsp9 protein interactions:<br>CCDC86            | DOWN | -2.53E+00 | 3.42E-02 | 7.05E-01 | -5.05E-01 |
| Nsp9 protein interactions:<br>TCF12             | UP   | 2.53E+00  | 3.97E-02 | 1.04E+00 | 6.07E-02  |
| Nsp9 protein interactions:<br>MAT1A,MAT2A,MAT2B | DOWN | -2.36E+00 | 4.34E-02 | 6.69E-01 | -5.81E-01 |
| Nsp9 protein interactions:<br>COPS2,COPS4,COPS5 | DOWN | -2.44E+00 | 4.57E-02 | 6.84E-01 | -5.49E-01 |
| Nsp9 protein interactions:<br>MEPCE,LARP7       | DOWN | -2.45E+00 | 4.57E-02 | 8.06E-01 | -3.11E-01 |
| Nsp4 and Nsp6 protein<br>interactions: ATP6AP1  | DOWN | -2.41E+00 | 4.99E-02 | 8.33E-01 | -2.63E-01 |
| Nsp9 protein interactions:<br>LARP4B            | UP   | 2.39E+00  | 5.07E-02 | 1.03E+00 | 4.31E-02  |
| Nsp9 protein interactions:<br>ZNF503,DCAF7      | DOWN | -2.27E+00 | 5.07E-02 | 7.46E-01 | -4.23E-01 |

**Table S6.**

Simulation scenarios and model behavior.

| No | Biological Scenarios                                                                                                                                                                                                      | Simulation results                                                                    | Model performance<br>(agreement/ partial<br>agreement/ disagreement) |
|----|---------------------------------------------------------------------------------------------------------------------------------------------------------------------------------------------------------------------------|---------------------------------------------------------------------------------------|----------------------------------------------------------------------|
| 1  | An unbalanced immune response, characterized by a weak production of type I interferons (IFN-Is) and an exacerbated release of proinflammatory cytokines, contributes to the severe forms of the COVID-19 disease. [PMID: | When all of the viral components are active, the inflammation phenotype is activated. | Agreement                                                            |

|   |                                                                                                                                                                                                                                                                                                                                                                                                                                                                                                                                                                                                                                                                                                                                                                                                                                       |                                                                                                                                                                                                                                                                                                     |           |
|---|---------------------------------------------------------------------------------------------------------------------------------------------------------------------------------------------------------------------------------------------------------------------------------------------------------------------------------------------------------------------------------------------------------------------------------------------------------------------------------------------------------------------------------------------------------------------------------------------------------------------------------------------------------------------------------------------------------------------------------------------------------------------------------------------------------------------------------------|-----------------------------------------------------------------------------------------------------------------------------------------------------------------------------------------------------------------------------------------------------------------------------------------------------|-----------|
|   | 32726355]                                                                                                                                                                                                                                                                                                                                                                                                                                                                                                                                                                                                                                                                                                                                                                                                                             |                                                                                                                                                                                                                                                                                                     |           |
| 2 | <p>SARS-CoV-2-inhibition of type I IFN responses in infected cells leads to delayed or suppressed type I IFN responses, allowing the virus to replicate unchecked and induce tissue damage.<br/>[PMID: 33619493, 33097660]</p> <p>SARS-Cov-2 is a poor inducer of IFN-I response <i>in vitro</i> and in animal models compared to other respiratory RNA viruses.<br/>[PMID: 32726355]</p> <p>Multiple viral structural and non-structural proteins antagonize interferon responses, contributing to inflammation.<br/>[PMID: 33619493, 32346093]</p> <p>The suppression of interferon signalling is a mechanism widely used by SARS-CoV-2 in diverse tissues to evade antiviral innate immunity, and targeting the viral mediators of immune evasion may help block virus replication in patients with COVID-19. [PMID: 33140044]</p> | When all of the viral components are active, the type 1 interferon immune response is inactive while the inflammation phenotype gets activated. We observe the inflammation reduction and activation of ISG expression antiviral response_phenotype after deactivating all of the viral components. | Agreement |
| 3 | <p>The viral ORF6, ORF8 and nucleocapsid proteins were potent inhibitors of the type I interferon signalling pathway, a key component for the antiviral response of host innate immunity. All three proteins strongly inhibited type I interferon (IFN-<math>\beta</math>) and NF-<math>\kappa</math>B-responsive promoters. [PMID: 32589897]</p>                                                                                                                                                                                                                                                                                                                                                                                                                                                                                     | In the presence of the ORF6 and ORF8 complex, and nucleocapsid protein (N), NF $\kappa$ B pathways and the type I interferon secretion are inactive.                                                                                                                                                | Agreement |
| 4 | <p>SARS-CoV-2 desensitizes host cells to interferon by inhibiting the JAK-STAT pathway.<br/>[PMID: 33140044]</p>                                                                                                                                                                                                                                                                                                                                                                                                                                                                                                                                                                                                                                                                                                                      | By activating the viral components, we observe the deactivation of STAT1 and STAT2_phosphorylated, which are part of the JAK/STAT pathway.                                                                                                                                                          | Agreement |
| 5 | <p>The antiviral response is intensified by various signalling factors, including sensors and transcriptional regulators, which are themselves ISGs induced by ISGF3 and/or directly by the IRF3/IRF7 transcriptional activators.<br/>[PMID: 32726355]</p> <p>The IRF3 gene is highly expressed in the activated CD4+ T cells of COVID-19 patients.[PMID: 32783921]</p>                                                                                                                                                                                                                                                                                                                                                                                                                                                               | Interferon regulatory factor 3 (IRF3 homodimer complex_nucleus) is activated by adding Azithromycin drug to the viral components including orf7a/b, orf3a, viral dsRNA, Nsp1, Nsp13, and E protein.<br>(Initial condition of the IRF3 affects complex formation.)                                   | Agreement |

|   |                                                                                                                                                                                                                                                               |                                                                                                                                                                                                                                                                                                                                                                                                        |                   |
|---|---------------------------------------------------------------------------------------------------------------------------------------------------------------------------------------------------------------------------------------------------------------|--------------------------------------------------------------------------------------------------------------------------------------------------------------------------------------------------------------------------------------------------------------------------------------------------------------------------------------------------------------------------------------------------------|-------------------|
| 6 | <p>Several interferon (IFN)-stimulated genes (ISGs; including ISG15, IFI44, IFI44L, and RSAD2) were specifically upregulated in PBMCs from COVID-19 patients, enhancing antiviral and immune-modulatory functions after viral infection. [PMID: 32783921]</p> | <p>When all of the viral components are active, the ISG expression_antiviral response_phenotype is inactivated; however, adding the Azithromycin_drug increases the ISG antiviral response. ISG15 ubiquitin-like modifier is inactive in this condition; however, blocking orf6 and activating STAT1/2_IRF9_complex can upregulate the expression of the ISG15 by affecting ISRE_complex pathways.</p> | Partial agreement |
| 7 | <p>Inhibition of SCoV2-PLpro with GRL-0617 impairs the virus-induced cytopathogenic effect, maintains the antiviral interferon pathway and reduces viral replication in infected cells. [PMID: 32726803]</p>                                                  | <p>When all of the viral components are active, the type 1 interferon response is inactive; By activating the GRL0617 drug, we didn't observe any effect on the antiviral interferon pathways or reduction of viral replication. The model suggests that applying GRL-0617 alone cannot impact this pathway.</p>                                                                                       | Disagreement      |

**Table S7.**

A list of 54 drug targets identified from the integrative and computational modeling analyses of omics data and C19DMap diagrams.

|        |       |         |
|--------|-------|---------|
| MAPK11 | STAT1 | TREML4  |
| SMAD1  | FOS   | TBK1    |
| TICAM1 | JUN   | ARL6IP6 |
| TBK1   | RELA  | CASP7   |
| IKBKE  | NFKB1 | LNPEP   |
| IRF3   | STAT2 | HMOX1   |
| ATF4   | IRF9  | FADD    |
| ATF6   | BACH1 | AKT1    |
| MBTPS1 | TBP   | ALG5    |
| TP53   | TCF12 | AGTR1/2 |
| STAT3  | IFIH1 | EGFR    |
| ISG5   | OAS1  | KEAP1   |
| JUND   | OAS2  | CUL3    |
| AHR    | OAS3  | E       |
| FOSL1  | IRF7  | nsp15   |
| MAS1   | BAX   | nsp14   |
| RBX1   | IFNB1 | nsp3    |
| TLR9   | TLR7  | nsp13   |

Tables S8 and S9 provided as a separate excel file

**Table S10.**

Top ranking instances across all pathways of the C19DMap bipartite graph.

| Ranking | Aggregated centrality value | Map species                                                  |
|---------|-----------------------------|--------------------------------------------------------------|
| 1       | 3.088928834                 | UNIPROT:P0DTD1<br><b>Replicase polyprotein 1ab SARS COV2</b> |
| 2       | 3.060313914                 | UNIPROT:P0DTC9<br><b>Nucleoprotein NCAP_SARS2</b>            |
| 3       | 3.045092464                 | UNIPROT:Q9BYF1<br><b>Angiotensin-converting enzyme 2</b>     |
| 4       | 2.974406697                 | UNIPROT:P0DTC3<br><b>ORF3a protein SARS COV2</b>             |
| 5       | 2.960697776                 | UNIPROT:P59632                                               |



|    |             |                                                                    |
|----|-------------|--------------------------------------------------------------------|
|    |             | <b>ORF3a protein SARS COV</b>                                      |
| 6  | 2.926930595 | UNIPROT:P59637<br><b>Envelope small membrane protein SARS COV</b>  |
| 7  | 2.921492419 | UNIPROT:P59595<br><b>Nucleoprotein SARS COV</b>                    |
| 8  | 2.91891734  | <b>Nsp6</b>                                                        |
| 9  | 2.917060121 | UNIPROT:P0DTC4<br><b>Envelope small membrane protein SARS COV2</b> |
| 10 | 2.894981602 | UNIPROT:P0DTC1<br><b>Replicase polyprotein 1a SARS COV2</b>        |

**Table S11.**

Top ranking instances by the aggregated centrality values within the Interferon type I pathway.

| <b>Aggregated centrality value</b> | <b>Map species</b>                                                                          |
|------------------------------------|---------------------------------------------------------------------------------------------|
| 2.99852173                         | UNIPROT:Q14653<br><b>IRF3</b>                                                               |
| 2.90197689                         | <b>Nsp3</b>                                                                                 |
| 2.833324697                        | UNIPROT:Q04206;UNIPROT:P19838<br><b>RELA:NFKB1</b>                                          |
| 2.770348427                        | <b>Nsp15</b>                                                                                |
| 2.673571447                        | UNIPROT:Q7Z434<br><b>MAVS</b>                                                               |
| 2.568232753                        | <b>Viral_dsRNA</b>                                                                          |
| 2.522809862                        | UNIPROT:P01574<br><b>IFNB</b>                                                               |
| 2.425625918                        | <b>Orf6</b>                                                                                 |
| 2.393485439                        | UNIPROT:Q14164;UNIPROT:Q9UHD2;UNIPROT:Q13114;UNIPROT:Q92844<br><b>IKBKE:TBK1:TRAF3:TANK</b> |
| 2.341295307                        | UNIPROT:O15455<br><b>TLR3</b>                                                               |

**Table S12.**

Top ranking instances by the aggregated centrality values within the Interferon lambda pathway.

| Aggregated centrality value | Map species                                                                                                  |
|-----------------------------|--------------------------------------------------------------------------------------------------------------|
| 2.647094921                 | UNIPROT:Q14653<br><b>IRF3</b>                                                                                |
| 2.614378989                 | <b>IFN_III</b>                                                                                               |
| 2.324754461                 | UNIPROT:P10914<br><b>IRF1</b>                                                                                |
| 2.313925511                 | UNIPROT:Q8IZI9;UNIPROT:Q8IZJ0;UNIPROT:Q8IU54;UNIPROT:K9M1<br>U5<br><b>IFNL3: IFNL2:IFNL1:IFNL4</b>           |
| 2.122800448                 | UNIPROT:Q8IU57;UNIPROT:P23458;UNIPROT:P29597<br><b>IFNLR1:JAK1:TYK2</b>                                      |
| 2.027010129                 | <b>dsRNA</b>                                                                                                 |
| 1.923644106                 | UNIPROT:O95786<br><b>RIG-I</b>                                                                               |
| 1.814816851                 | UNIPROT:O14920;UNIPROT:O15111;UNIPROT:O95786;UNIPROT:Q9U<br>HD2;UNIPROT:Q7Z434<br><b>IKK:TBK1:RIG-I:MAVS</b> |
| 1.790330986                 | UNIPROT:O95786;UNIPROT:Q7Z434<br><b>RIG-I:MAVS</b>                                                           |
| 1.537042334                 | UNIPROT:Q7Z434;UNIPROT:O95786<br><b>MAVS:RIG-I</b>                                                           |

**Table S13.**

Top ranking instances by the aggregated centrality values within the Apoptosis pathway.

| Aggregated centrality value | Map species                    |
|-----------------------------|--------------------------------|
| 2.790670304                 | UNIPROT:Q14790<br><b>CASP8</b> |
| 2.575114314                 | UNIPROT:P55211<br><b>CASP9</b> |

|             |                                                               |
|-------------|---------------------------------------------------------------|
| 2.46327704  | <b>Apoptosis</b>                                              |
| 2.33125067  | UNIPROT:P59637<br><b>Envelope small membrane protein SARS</b> |
| 2.208875087 | UNIPROT:P42574<br><b>CASP3</b>                                |
| 2.208875087 | UNIPROT:P55210<br><b>CASP7</b>                                |
| 2.179943105 | UNIPROT:Q13158<br><b>FADD</b>                                 |
| 2.146130422 | UNIPROT:P31749<br><b>AKT1</b>                                 |
| 1.796281512 | UNIPROT:P99999<br><b>CYCS</b>                                 |
| 1.775255449 | UNIPROT:P55957<br><b>BID</b>                                  |

**Table S14.**

Top ranking instances by the aggregated centrality values within the Coagulation pathway.

| <b>Aggregated centrality value</b> | <b>Map species</b>                                                                                                                                     |
|------------------------------------|--------------------------------------------------------------------------------------------------------------------------------------------------------|
| 3.024512997                        | <b>SARS_CoV_2_infection</b>                                                                                                                            |
| 2.768981505                        | UNIPROT:P00734<br><b>Prothrombin/ Thrombin (F2)</b>                                                                                                    |
| 2.742875284                        | UNIPROT:P00747<br><b>Plasminogen (PLG)</b>                                                                                                             |
| 2.664962377                        | UNIPROT:P13671;UNIPROT:P07357;UNIPROT:P01031;UNIPROT:P10643<br>;UNIPROT:P07360;UNIPROT:P02748;UNIPROT:P07358<br><b>C6:C8A:C5:C7:C8G:C9:C8B (C5b-9)</b> |
| 2.65809911                         | UNIPROT:P30556<br><b>AGTR1</b>                                                                                                                         |
| 2.657606153                        | UNIPROT:P0C0L5<br><b>C4B</b>                                                                                                                           |
| 2.631358595                        | <b>Thrombosis</b>                                                                                                                                      |

|             |                                   |
|-------------|-----------------------------------|
| 2.549145423 | UNIPROT:P00750<br><b>PLAT</b>     |
| 2.540683322 | UNIPROT:P04070<br><b>PROC</b>     |
| 2.432797266 | UNIPROT:P05121<br><b>SERPINE1</b> |

**Table S15.**

Top ranking instances by the aggregated centrality values within the Renin-Angiotensin pathway.

| Aggregated centrality value | Map species                                                     |
|-----------------------------|-----------------------------------------------------------------|
| 2.952636737                 | UNIPROT:P30556<br><b>AGTR1</b>                                  |
| 2.876342802                 | UNIPROT:Q9BYF1<br><b>ACE2</b>                                   |
| 2.760902828                 | UNIPROT:P12821<br><b>ACE</b>                                    |
| 2.56692845                  | UNIPROT:P04201<br><b>MAS</b>                                    |
| 2.382326458                 | UNIPROT:P50052<br><b>AGTR2</b>                                  |
| 2.296031373                 | UNIPROT:P0DTC2;UNIPROT:P59594<br><b>SPIKE_SARS2: SPIKE_SARS</b> |
| 2.237870739                 | <b>angiotensin_A</b>                                            |
| 2.217315056                 | <b>angiotensin_1-12</b>                                         |
| 2.141851032                 | <b>angiotensin_3-7</b>                                          |
| 2.135741406                 | UNIPROT:P08473<br><b>EPN</b>                                    |

**Table S16.**

11 out of the 54 identified targets that rank in the top 30% instances of the aggregated network by aggregated centrality values.

| <i>Protein / Gene</i> | <i>Node label</i>     | <i>Rank</i> | <i>Aggregated centrality value</i> |
|-----------------------|-----------------------|-------------|------------------------------------|
| <i>HMOX1</i>          | <i>UNIPROT09601</i>   | <i>32</i>   | <i>2,74319632</i>                  |
| <i>STAT2</i>          | <i>UNIPROT52630</i>   | <i>92</i>   | <i>2,4594734</i>                   |
| <i>RBX1</i>           | <i>UNIPROT62877</i>   | <i>98</i>   | <i>2,43757737</i>                  |
| <i>ATF6</i>           | <i>UNIPROT18850</i>   | <i>129</i>  | <i>2,33493298</i>                  |
| <i>TREML4</i>         | <i>UNIPROT:Q6UXN2</i> | <i>145</i>  | <i>2,28702511</i>                  |
| <i>ATF4</i>           | <i>UNIPROT18848</i>   | <i>385</i>  | <i>1,90123974</i>                  |
| <i>TCF12</i>          | <i>UNIPROT:Q99081</i> | <i>512</i>  | <i>1,84628427</i>                  |
| <i>OAS3</i>           | <i>UNIPROT:Q9Y6K5</i> | <i>548</i>  | <i>1,80576535</i>                  |
| <i>OAS2</i>           | <i>UNIPROT29728</i>   | <i>549</i>  | <i>1,80576535</i>                  |
| <i>OAS1</i>           | <i>UNIPROT00973</i>   | <i>550</i>  | <i>1,80550953</i>                  |
| <i>ISG15</i>          | <i>UNIPROT05161</i>   | <i>561</i>  | <i>1,78758416</i>                  |

**Table S17.**

Number of drug candidates targeting transcription factors detected; “Common Transcription Factor” represents transcription factors detected for both NHBE and A549 cell types listed in Table 1; “External Clinical Trials” represents drugs already in external clinical trials for COVID19 designated in DrugBank.

|                                 | External Clinical Trials | Not External Clinical Trials |
|---------------------------------|--------------------------|------------------------------|
| Common Transcription Factor     | 47                       | 160                          |
| Not Common Transcription Factor | 36                       | 103                          |
