# Supplementary material for: Drug-target identification in COVID-19 disease mechanisms using computational systems biology approaches
Source: Front Immunol. 2024 Feb 13;14:1282859. doi: 10.3389/fimmu.2023.1282859 (PMC10897000; doi:10.3389/fimmu.2023.1282859)
Supplement: Supplementary file 1 [file DataSheet_1.xlsx]

## Sheet: Sup_Tables_S8
	agent_id	agent_name	source
AGTR1	chebi:CHEBI:9434	telmisartan	INDRA (drugs)
AGTR1	chebi:CHEBI:9927	valsartan	INDRA (drugs)
AGTR1	chebi:CHEBI:6541	losartan	INDRA (drugs)
AGTR1	chebi:CHEBI:17234	glucose	INDRA (drugs)
AGTR1	chebi:CHEBI:5959	irbesartan	INDRA (drugs)
AGTR1	chebi:CHEBI:16480	nitric oxide	INDRA (drugs)
AGTR1	drugbank:DB00876	eprosartan	AILANI
AGTR1	mirna:hsa-miR-124-3p		AILANI
AGTR1	mirna:hsa-miR-155-5p		AILANI
AGTR1	drugbank:DB11842	angiotensin ii	Clinical Trials DB
AGTR1	chebi:CHEBI:18320	1,4-dithiothreitol	INDRA (drugs)
AGTR1	chebi:CHEBI:4903	17alpha-ethynylestradiol	INDRA (drugs)
AGTR1	chebi:CHEBI:50114	estrogen	INDRA (drugs)
AGTR1	drugbank:DB01349	tasosartan	AILANI
AGTR1	drugbank:DB08822	azilsartan medoxomil	AILANI
AGTR1	mirna:hsa-miR-26b-5p		AILANI
AGTR1	drugbank:DB01029	irbesartan	AILANI
AGTR1	chebi:CHEBI:3347	candesartan	INDRA (drugs)
AGTR1	drugbank:DB00275	olmesartan	AILANI
AGTR1	drugbank:DB01342	forasartan	AILANI
AGTR1	drugbank:DB01347	saprisartan	AILANI
AGTR2	mirna:hsa-miR-5706		AILANI
AGTR2	mirna:hsa-miR-142-3p		AILANI
AGTR2	mirna:hsa-miR-548p		AILANI
AGTR2	mirna:hsa-miR-378j		AILANI
AGTR2	mirna:hsa-miR-516b-5p		AILANI
AGTR2	drugbank:DB01349	tasosartan	AILANI
AGTR2	mirna:hsa-miR-6839-5p		AILANI
AGTR2	mirna:hsa-miR-1468-3p		AILANI
AGTR2	pubchem.compound:24758425	aldosterone	INDRA (drugs)
AGTR2	mirna:hsa-miR-148b-3p		AILANI
AGTR2	chebi:CHEBI:131170	(3s)-3-amino-4-[[(2s)-1-[[(2s)-1-[[(2s)-1-[[(2s,3s)-1-[[(2s)-1-[(2s)-2-[[[(1s)-1-carboxy-2-phenylethyl]amino]-oxomethyl]-1-pyrrolidinyl]-3-(1h-imidazol-5-yl)-1-oxopropan-2-yl]amino]-3-methyl-1-oxopentan-2-yl]amino]-3-(4-hydroxyphenyl)-1-oxopropan-2-yl]amino]-3-methyl-1-oxobutan-2-yl]amino]-5-(diaminomethylideneamino)-1-oxopentan-2-yl]amino]-4-oxobutanoic acid	INDRA (drugs)
AGTR2	mirna:hsa-miR-1299		AILANI
AGTR2	chebi:CHEBI:16480	nitric oxide	INDRA (drugs)
AGTR2	mirna:hsa-miR-4782-5p		AILANI
AGTR2	chebi:CHEBI:16240	hydrogen peroxide	INDRA (drugs)
AGTR2	mirna:hsa-miR-124-3p		AILANI
AGTR2	chebi:CHEBI:61014	pd123319	INDRA (drugs)
AGTR2	chembl.compound:CHEMBL995	losartan potassium	INDRA (drugs)
AGTR2	chebi:CHEBI:29309	methyl	INDRA (drugs)
AGTR2	chebi:CHEBI:44915	propofol	INDRA (drugs)
AGTR2	chebi:CHEBI:6541	losartan	INDRA (drugs)
AGTR2	chembl.compound:CHEMBL3989932	angiotensin ii acetate	INDRA (drugs)
AHR	chebi:CHEBI:28119	2,3,7,8-tetrachlorodibenzodioxine	INDRA (drugs)
AHR	chebi:CHEBI:41879	dexamethasone	INDRA (drugs)
AHR	chebi:CHEBI:27881	resveratrol	INDRA (drugs)
AHR	mirna:hsa-miR-3913-5p		AILANI
AHR	mirna:hsa-miR-3927-3p		AILANI
AHR	chebi:CHEBI:6804	methacholine	INDRA (drugs)
AHR	mirna:hsa-miR-3689a-3p		AILANI
AHR	mirna:hsa-miR-3689b-3p		AILANI
AHR	mirna:hsa-miR-4284		AILANI
AHR	chebi:CHEBI:76995	alpha-naphthoflavone	INDRA (drugs)
AHR	mirna:hsa-miR-383-5p		AILANI
AHR	chebi:CHEBI:16236	ethanol	INDRA (drugs)
AHR	mirna:hsa-miR-3152-5p		AILANI
AHR	chebi:CHEBI:4806	(-)-epigallocatechin 3-gallate	INDRA (drugs)
AHR	mirna:hsa-miR-377-5p		AILANI
AHR	mirna:hsa-miR-383-3p		AILANI
AHR	mirna:hsa-let-7g-5p		AILANI
AHR	mirna:hsa-let-7i-5p		AILANI
AHR	mirna:hsa-miR-124-3p		AILANI
AHR	mirna:hsa-miR-550b-2-5p		AILANI
AHR	mirna:hsa-miR-6086		AILANI
AHR	mirna:hsa-miR-1258		AILANI
AHR	mirna:hsa-miR-1273e		AILANI
AHR	mirna:hsa-miR-1273h-5p		AILANI
AHR	mirna:hsa-miR-3689c		AILANI
AHR	mirna:hsa-let-7e-5p		AILANI
AHR	mirna:hsa-let-7f-5p		AILANI
AHR	mirna:hsa-miR-181a-5p		AILANI
AHR	mirna:hsa-miR-2467-5p		AILANI
AHR	mirna:hsa-miR-26a-5p		AILANI
AHR	mirna:hsa-miR-30b-3p		AILANI
AHR	mirna:hsa-miR-30c-1-3p		AILANI
AHR	mirna:hsa-miR-30c-2-3p		AILANI
AHR	mirna:hsa-miR-3117-3p		AILANI
AHR	mirna:hsa-miR-3122		AILANI
AHR	chebi:CHEBI:16412	lipopolysaccharide	INDRA (drugs)
AHR	chebi:CHEBI:77260	5-methoxy-2-\{[(4-methoxy-3,5-dimethylpyridin-2-yl)methyl]sulfinyl\}-1h-benzimidazole	INDRA (drugs)
AHR	chebi:CHEBI:9168	sirolimus	INDRA (drugs)
AHR	drugbank:DB00379	mexiletine	AILANI
AHR	drugbank:DB00393	nimodipine	AILANI
AHR	drugbank:DB00499	flutamide	AILANI
AHR	drugbank:DB01076	atorvastatin	AILANI
AHR	drugbank:DB01097	leflunomide	AILANI
AHR	drugbank:DB01404	ginseng	AILANI
AHR	mirna:hsa-miR-1197		AILANI
AHR	mirna:hsa-miR-1227-3p		AILANI
AHR	mirna:hsa-miR-1233-5p		AILANI
AHR	mirna:hsa-miR-625-5p		AILANI
AHR	mirna:hsa-miR-6499-3p		AILANI
AHR	mirna:hsa-miR-6513-5p		AILANI
AHR	mirna:hsa-miR-130b-3p		AILANI
AHR	mirna:hsa-miR-149-3p		AILANI
AHR	mirna:hsa-miR-16-1-3p		AILANI
AHR	mirna:hsa-miR-6779-5p		AILANI
AHR	mirna:hsa-miR-6780a-5p		AILANI
AHR	mirna:hsa-miR-6785-5p		AILANI
AHR	mirna:hsa-miR-6788-5p		AILANI
AHR	mirna:hsa-miR-6799-5p		AILANI
AHR	mirna:hsa-miR-6807-5p		AILANI
AHR	mirna:hsa-miR-6831-5p		AILANI
AHR	mirna:hsa-miR-6840-3p		AILANI
AHR	mirna:hsa-miR-6883-5p		AILANI
AHR	mirna:hsa-miR-7106-5p		AILANI
AHR	mirna:hsa-miR-7977		AILANI
AHR	mirna:hsa-miR-887-5p		AILANI
AHR	mirna:hsa-miR-98-5p		AILANI
AHR	mirna:hsa-miR-4451		AILANI
AHR	mirna:hsa-miR-4458		AILANI
AHR	mirna:hsa-miR-4459		AILANI
AHR	mirna:hsa-miR-4500		AILANI
AHR	mirna:hsa-miR-450a-1-3p		AILANI
AHR	mirna:hsa-let-7a-5p		AILANI
AHR	mirna:hsa-let-7b-5p		AILANI
AHR	mirna:hsa-let-7c-5p		AILANI
AHR	mirna:hsa-let-7d-5p		AILANI
AHR	mirna:hsa-miR-545-5p		AILANI
AHR	mirna:hsa-miR-6516-5p		AILANI
AHR	mirna:hsa-miR-665		AILANI
AHR	mirna:hsa-miR-6778-5p		AILANI
AHR	mirna:hsa-miR-4699-5p		AILANI
AHR	mirna:hsa-miR-4761-5p		AILANI
AHR	mirna:hsa-miR-4774-3p		AILANI
AHR	mirna:hsa-miR-4775		AILANI
AHR	mirna:hsa-miR-4645-3p		AILANI
AHR	mirna:hsa-miR-4728-5p		AILANI
AHR	mirna:hsa-miR-455-3p		AILANI
AKT1	mirna:hsa-miR-143-3p		AILANI
AKT1	mirna:hsa-miR-149-3p		AILANI
AKT1	mirna:hsa-miR-155-5p		AILANI
AKT1	mirna:hsa-miR-192-3p		AILANI
AKT1	mirna:hsa-miR-133b		AILANI
AKT1	mirna:hsa-miR-125b-5p		AILANI
AKT1	mirna:hsa-miR-188-5p		AILANI
AKT1	mirna:hsa-miR-185-5p		AILANI
AKT1	mirna:hsa-miR-193b-3p		AILANI
AKT1	chebi:CHEBI:17489	3',5'-cyclic amp	INDRA (drugs)
AKT1	mirna:hsa-miR-199a-3p		AILANI
AKT1	chebi:CHEBI:17761	ceramide	INDRA (drugs)
AKT1	chebi:CHEBI:27881	resveratrol	INDRA (drugs)
AKT1	chebi:CHEBI:3962	curcumin	INDRA (drugs)
AKT1	chebi:CHEBI:64153	tanespimycin	INDRA (drugs)
AKT1	chebi:CHEBI:65329	ly294002	INDRA (drugs)
AKT1	mirna:hsa-miR-100-5p		AILANI
AKT1	mirna:hsa-miR-105-5p		AILANI
AKT1	chebi:CHEBI:15738	staurosporine	INDRA (drugs)
AKT1	chebi:CHEBI:15756	hexadecanoic acid	INDRA (drugs)
AKT1	chebi:CHEBI:67271	mk-2206	INDRA (drugs)
AKT1	drugbank:DB00171	adenosine triphosphate	AILANI
AKT1	drugbank:DB01169	arsenic trioxide	AILANI
AKT1	drugbank:DB01863	inositol 1,3,4,5-tetrakisphosphate	AILANI
AKT1	drugbank:DB07584	n-[2-(5-methyl-4h-1,2,4-triazol-3-yl)phenyl]-7h-pyrrolo[2,3-d]pyrimidin-4-amine	AILANI
AKT1	drugbank:DB07585	5-(5-chloro-7h-pyrrolo[2,3-d]pyrimidin-4-yl)-4,5,6,7-tetrahydro-1h-imidazo[4,5-c]pyridine	AILANI
AKT1	mirna:hsa-miR-19a-3p		AILANI
AKT1	mirna:hsa-miR-26b-5p		AILANI
AKT1	mirna:hsa-miR-27a-5p		AILANI
AKT1	chebi:CHEBI:9168	sirolimus	INDRA (drugs)
AKT1	mirna:hsa-miR-708-5p		AILANI
AKT1	mirna:hsa-miR-7110-3p		AILANI
AKT1	mirna:hsa-miR-378a-3p		AILANI
AKT1	mirna:hsa-miR-378b		AILANI
AKT1	mirna:hsa-miR-378c		AILANI
AKT1	mirna:hsa-miR-378d		AILANI
AKT1	mirna:hsa-miR-378e		AILANI
AKT1	mirna:hsa-miR-378f		AILANI
AKT1	mirna:hsa-miR-378h		AILANI
AKT1	mirna:hsa-miR-378i		AILANI
AKT1	mirna:hsa-miR-422a		AILANI
AKT1	mirna:hsa-miR-451a		AILANI
AKT1	mirna:hsa-miR-4638-3p		AILANI
AKT1	mirna:hsa-miR-4742-3p		AILANI
AKT1	mirna:hsa-miR-4757-3p		AILANI
AKT1	mirna:hsa-miR-496		AILANI
AKT1	mirna:hsa-miR-518c-5p		AILANI
AKT1	mirna:hsa-miR-625-3p		AILANI
AKT1	mirna:hsa-miR-6503-3p		AILANI
AKT1	mirna:hsa-miR-654-3p		AILANI
AKT1	mirna:hsa-miR-6764-3p		AILANI
AKT1	mirna:hsa-miR-6817-3p		AILANI
AKT1	mirna:hsa-miR-6824-3p		AILANI
AKT1	mirna:hsa-miR-6866-3p		AILANI
AKT1	mirna:hsa-miR-6873-3p		AILANI
AKT1	mirna:hsa-miR-302a-3p		AILANI
AKT1	mirna:hsa-miR-302b-3p		AILANI
AKT1	mirna:hsa-miR-302c-3p		AILANI
AKT1	mirna:hsa-miR-302d-3p		AILANI
AKT1	mirna:hsa-miR-3191-5p		AILANI
AKT1	mirna:hsa-miR-326		AILANI
AKT1	mirna:hsa-miR-330-5p		AILANI
AKT1	mirna:hsa-miR-365a-3p		AILANI
AKT1	mirna:hsa-miR-365b-3p		AILANI
ALG5	mirna:hsa-miR-24-3p		AILANI
ARL6IP6	mirna:hsa-miR-3941		AILANI
ARL6IP6	mirna:hsa-miR-3942-3p		AILANI
ARL6IP6	mirna:hsa-miR-4301		AILANI
ARL6IP6	mirna:hsa-miR-4427		AILANI
ARL6IP6	mirna:hsa-miR-4760-3p		AILANI
ARL6IP6	mirna:hsa-miR-4293		AILANI
ARL6IP6	mirna:hsa-miR-3140-5p		AILANI
ARL6IP6	mirna:hsa-miR-3156-3p		AILANI
ARL6IP6	mirna:hsa-miR-32-3p		AILANI
ARL6IP6	mirna:hsa-miR-329-3p		AILANI
ARL6IP6	mirna:hsa-miR-362-3p		AILANI
ARL6IP6	mirna:hsa-miR-374c-3p		AILANI
ARL6IP6	mirna:hsa-let-7a-5p		AILANI
ARL6IP6	mirna:hsa-miR-1260a		AILANI
ARL6IP6	mirna:hsa-miR-1260b		AILANI
ARL6IP6	mirna:hsa-miR-132-3p		AILANI
ARL6IP6	mirna:hsa-miR-142-3p		AILANI
ARL6IP6	mirna:hsa-miR-181a-5p		AILANI
ARL6IP6	mirna:hsa-miR-4760-5p		AILANI
ARL6IP6	mirna:hsa-miR-5100		AILANI
ARL6IP6	mirna:hsa-miR-5696		AILANI
ARL6IP6	mirna:hsa-miR-579-3p		AILANI
ARL6IP6	mirna:hsa-miR-596		AILANI
ARL6IP6	mirna:hsa-miR-603		AILANI
ARL6IP6	mirna:hsa-miR-664a-3p		AILANI
ARL6IP6	mirna:hsa-miR-8485		AILANI
ARL6IP6	mirna:hsa-miR-664b-3p		AILANI
ARL6IP6	mirna:hsa-miR-8061		AILANI
ARL6IP6	mirna:hsa-miR-188-3p		AILANI
ARL6IP6	mirna:hsa-miR-205-3p		AILANI
ATF4	chebi:CHEBI:17234	glucose	INDRA (drugs)
ATF4	chebi:CHEBI:50924	sorafenib	INDRA (drugs)
ATF4	chebi:CHEBI:16412	lipopolysaccharide	INDRA (drugs)
ATF4	drugbank:DB00852	pseudoephedrine	AILANI
ATF4	chebi:CHEBI:9168	sirolimus	INDRA (drugs)
ATF4	mirna:hsa-miR-196b-5p		AILANI
ATF4	mirna:hsa-miR-214-3p		AILANI
ATF4	mirna:hsa-miR-342-3p		AILANI
ATF4	chebi:CHEBI:9908	ursolic acid	INDRA (drugs)
ATF4	chebi:CHEBI:9629	tomatidine	INDRA (drugs)
ATF6	chebi:CHEBI:17234	glucose	INDRA (drugs)
ATF6	chebi:CHEBI:17051	fluoride	INDRA (drugs)
ATF6	mirna:hsa-miR-199a-5p		AILANI
ATF6	chebi:CHEBI:44975	1,10-phenanthroline	INDRA (drugs)
ATF6	mirna:hsa-miR-7153-3p		AILANI
ATF6	mirna:hsa-miR-7106-5p		AILANI
ATF6	mirna:hsa-miR-208a-5p		AILANI
ATF6	chebi:CHEBI:16796	melatonin	INDRA (drugs)
ATF6	mirna:hsa-miR-208b-5p		AILANI
ATF6	mirna:hsa-miR-6780a-5p		AILANI
ATF6	mirna:hsa-miR-6799-5p		AILANI
ATF6	mirna:hsa-miR-503-5p		AILANI
ATF6	mirna:hsa-miR-6779-5p		AILANI
ATF6	mirna:hsa-miR-6883-5p		AILANI
ATF6	mirna:hsa-miR-6871-5p		AILANI
ATF6	mirna:hsa-miR-30b-3p		AILANI
ATF6	mirna:hsa-miR-552-5p		AILANI
ATF6	mirna:hsa-miR-4728-5p		AILANI
ATF6	mirna:hsa-miR-191-5p		AILANI
ATF6	chebi:CHEBI:73815	arg-leu	INDRA (drugs)
ATF6	chebi:CHEBI:16236	ethanol	INDRA (drugs)
ATF6	mirna:hsa-miR-149-3p		AILANI
ATF6	mirna:hsa-miR-6785-5p		AILANI
ATF6	mirna:hsa-miR-1273h-5p		AILANI
ATF6	mirna:hsa-miR-335-5p		AILANI
ATF6	mirna:hsa-miR-424-5p		AILANI
ATF6	mirna:hsa-miR-3689c		AILANI
ATF6	drugbank:DB00852	pseudoephedrine	AILANI
ATF6	mirna:hsa-miR-3689b-3p		AILANI
ATF6	mirna:hsa-miR-3689a-3p		AILANI
BACH1	mirna:hsa-miR-3606-3p		AILANI
BACH1	mirna:hsa-miR-520a-3p		AILANI
BACH1	mirna:hsa-miR-361-5p		AILANI
BACH1	mirna:hsa-miR-520b		AILANI
BACH1	mirna:hsa-miR-513a-3p		AILANI
BACH1	mirna:hsa-miR-5187-5p		AILANI
BACH1	mirna:hsa-miR-513c-3p		AILANI
BACH1	mirna:hsa-miR-548j-5p		AILANI
BACH1	mirna:hsa-miR-4685-3p		AILANI
BACH1	mirna:hsa-miR-4713-5p		AILANI
BACH1	mirna:hsa-miR-4719		AILANI
BACH1	mirna:hsa-miR-629-3p		AILANI
BACH1	mirna:hsa-miR-496		AILANI
BACH1	mirna:hsa-miR-4802-5p		AILANI
BACH1	mirna:hsa-miR-580-3p		AILANI
BACH1	mirna:hsa-miR-590-3p		AILANI
BACH1	mirna:hsa-miR-603		AILANI
BACH1	mirna:hsa-miR-5192		AILANI
BACH1	mirna:hsa-miR-4789-3p		AILANI
BACH1	mirna:hsa-miR-362-3p		AILANI
BACH1	mirna:hsa-miR-520d-3p		AILANI
BACH1	mirna:hsa-miR-520e		AILANI
BACH1	mirna:hsa-miR-497-3p		AILANI
BACH1	mirna:hsa-miR-5011-5p		AILANI
BACH1	mirna:hsa-miR-4644		AILANI
BACH1	mirna:hsa-miR-466		AILANI
BACH1	mirna:hsa-miR-4666a-5p		AILANI
BACH1	mirna:hsa-miR-548h-5p		AILANI
BACH1	mirna:hsa-miR-4703-3p		AILANI
BACH1	chebi:CHEBI:29866	arsenite(3-)	INDRA (drugs)
BACH1	mirna:hsa-miR-4794		AILANI
BACH1	mirna:hsa-miR-520c-3p		AILANI
BACH1	mirna:hsa-miR-548au-5p		AILANI
BACH1	mirna:hsa-miR-548av-5p		AILANI
BACH1	mirna:hsa-miR-507		AILANI
BACH1	mirna:hsa-miR-511-3p		AILANI
BACH1	mirna:hsa-miR-3143		AILANI
BACH1	mirna:hsa-miR-3156-3p		AILANI
BACH1	mirna:hsa-miR-329-3p		AILANI
BACH1	mirna:hsa-miR-548i		AILANI
BACH1	mirna:hsa-miR-643		AILANI
BACH1	mirna:hsa-miR-302a-3p		AILANI
BACH1	mirna:hsa-miR-302b-3p		AILANI
BACH1	mirna:hsa-miR-455-3p		AILANI
BACH1	mirna:hsa-miR-4643		AILANI
BACH1	mirna:hsa-miR-548bb-5p		AILANI
BACH1	mirna:hsa-miR-548d-5p		AILANI
BACH1	mirna:hsa-miR-548c-5p		AILANI
BACH1	chebi:CHEBI:22977	cadmium atom	INDRA (drugs)
BACH1	pubchem.compound:455658	hemin	INDRA (drugs)
BACH1	chebi:CHEBI:30413	heme	INDRA (drugs)
BACH1	mirna:hsa-miR-3622a-3p		AILANI
BACH1	mirna:hsa-miR-3622b-3p		AILANI
BACH1	mirna:hsa-miR-6516-5p		AILANI
BACH1	mirna:hsa-miR-664a-5p		AILANI
BACH1	mirna:hsa-miR-302e		AILANI
BACH1	mirna:hsa-miR-31-3p		AILANI
BACH1	mirna:hsa-miR-559		AILANI
BACH1	chebi:CHEBI:207229	dihydroartemisinin	INDRA (drugs)
BACH1	mirna:hsa-miR-548ae-5p		AILANI
BACH1	mirna:hsa-miR-185-5p		AILANI
BACH1	mirna:hsa-miR-548ap-5p		AILANI
BACH1	mirna:hsa-miR-548aq-5p		AILANI
BACH1	mirna:hsa-miR-548ar-5p		AILANI
BACH1	mirna:hsa-miR-548as-5p		AILANI
BACH1	mirna:hsa-miR-4458		AILANI
BACH1	mirna:hsa-miR-4469		AILANI
BACH1	mirna:hsa-miR-548ay-5p		AILANI
BACH1	mirna:hsa-miR-548b-5p		AILANI
BACH1	mirna:hsa-miR-548ab		AILANI
BACH1	mirna:hsa-miR-98-5p		AILANI
BACH1	mirna:kshv-miR-K12-11-3p		AILANI
BACH1	mirna:hsa-miR-142-3p		AILANI
BACH1	mirna:hsa-miR-202-3p		AILANI
BACH1	mirna:hsa-miR-548k		AILANI
BACH1	mirna:hsa-miR-548l		AILANI
BACH1	mirna:hsa-miR-302c-3p		AILANI
BACH1	mirna:hsa-miR-302d-3p		AILANI
BACH1	mirna:hsa-miR-548w		AILANI
BACH1	mirna:hsa-miR-96-3p		AILANI
BACH1	mirna:hsa-miR-557		AILANI
BACH1	mirna:hsa-miR-5580-5p		AILANI
BACH1	mirna:hsa-miR-3926		AILANI
BACH1	mirna:hsa-miR-155-5p		AILANI
BACH1	chebi:CHEBI:50385	hemin	INDRA (drugs)
BACH1	mirna:hsa-miR-6504-3p		AILANI
BACH1	mirna:hsa-miR-6514-5p		AILANI
BACH1	mirna:hsa-miR-3668		AILANI
BACH1	mirna:hsa-miR-520f-3p		AILANI
BACH1	mirna:hsa-miR-539-5p		AILANI
BACH1	mirna:hsa-miR-548y		AILANI
BACH1	mirna:hsa-miR-548ad-5p		AILANI
BACH1	mirna:hsa-miR-3941		AILANI
BACH1	mirna:hsa-miR-188-3p		AILANI
BACH1	mirna:hsa-miR-4451		AILANI
BACH1	mirna:hsa-miR-4324		AILANI
BACH1	mirna:hsa-miR-8485		AILANI
BACH1	mirna:hsa-miR-4500		AILANI
BACH1	mirna:hsa-miR-450b-5p		AILANI
BACH1	mirna:hsa-miR-543		AILANI
BACH1	mirna:hsa-miR-1260b		AILANI
BACH1	mirna:hsa-miR-372-3p		AILANI
BACH1	mirna:hsa-miR-3924		AILANI
BACH1	mirna:hsa-miR-3935		AILANI
BACH1	mirna:hsa-miR-548ak		AILANI
BACH1	mirna:hsa-miR-196b-5p		AILANI
BACH1	mirna:hsa-miR-20a-5p		AILANI
BACH1	mirna:hsa-miR-2115-3p		AILANI
BACH1	mirna:hsa-miR-548o-5p		AILANI
BACH1	mirna:hsa-miR-548s		AILANI
BACH1	mirna:hsa-miR-944		AILANI
BACH1	mirna:hsa-miR-548a-5p		AILANI
BACH1	mirna:hsa-miR-548am-5p		AILANI
BACH1	mirna:hsa-miR-373-3p		AILANI
BACH1	mirna:hsa-miR-6758-5p		AILANI
BACH1	mirna:hsa-miR-6832-5p		AILANI
BACH1	mirna:hsa-miR-6516-3p		AILANI
BACH1	mirna:hsa-miR-4287		AILANI
BACH1	mirna:hsa-miR-4301		AILANI
BACH1	mirna:hsa-miR-4306		AILANI
BACH1	mirna:hsa-miR-1260a		AILANI
BACH1	mirna:hsa-miR-6728-5p		AILANI
BACH1	mirna:hsa-miR-6765-3p		AILANI
BACH1	mirna:hsa-miR-4251		AILANI
BACH1	mirna:hsa-miR-190a-3p		AILANI
BACH1	mirna:hsa-let-7b-5p		AILANI
BACH1	mirna:hsa-miR-7113-3p		AILANI
BACH1	mirna:hsa-miR-8076		AILANI
BACH1	mirna:hsa-miR-8054		AILANI
BACH1	mirna:hsa-miR-196a-5p		AILANI
BACH1	mirna:hsa-miR-125b-5p		AILANI
BACH1	mirna:hsa-miR-3680-3p		AILANI
BACH1	mirna:hsa-let-7d-5p		AILANI
BACH1	mirna:hsa-let-7a-5p		AILANI
BACH1	mirna:hsa-miR-6871-5p		AILANI
BACH1	mirna:hsa-let-7f-5p		AILANI
BACH1	mirna:hsa-miR-769-5p		AILANI
BACH1	mirna:hsa-miR-4280		AILANI
BACH1	mirna:hsa-miR-1185-2-3p		AILANI
BACH1	chebi:CHEBI:75142	n-benzyloxycarbonyl-l-leucyl-l-leucyl-l-leucinal	INDRA (drugs)
BACH1	mirna:hsa-let-7f-2-3p		AILANI
BACH1	chebi:CHEBI:52646	leptomycin b	INDRA (drugs)
BACH1	mirna:hsa-miR-6856-5p		AILANI
BACH1	mirna:hsa-miR-6867-3p		AILANI
BACH1	mirna:hsa-let-7e-5p		AILANI
BACH1	mirna:hsa-miR-376a-2-5p		AILANI
BACH1	mirna:hsa-miR-8074		AILANI
BACH1	mirna:hsa-miR-1185-1-3p		AILANI
BACH1	mirna:hsa-let-7g-5p		AILANI
BACH1	mirna:hsa-let-7c-5p		AILANI
BACH1	mirna:hsa-let-7i-5p		AILANI
BAX	chebi:CHEBI:23924	enzyme inhibitor	INDRA (drugs)
BAX	chebi:CHEBI:16796	melatonin	INDRA (drugs)
BAX	chebi:CHEBI:17234	glucose	INDRA (drugs)
BAX	chebi:CHEBI:9753	troglitazone	INDRA (drugs)
BAX	chebi:CHEBI:26523	reactive oxygen species	INDRA (drugs)
BAX	chebi:CHEBI:27881	resveratrol	INDRA (drugs)
BAX	chebi:CHEBI:9168	sirolimus	INDRA (drugs)
BAX	chebi:CHEBI:4031	cyclosporin a	INDRA (drugs)
BAX	mirna:hsa-miR-122-5p		AILANI
BAX	mirna:hsa-miR-128-3p		AILANI
BAX	mirna:hsa-miR-148b-3p		AILANI
BAX	chebi:CHEBI:52717	bortezomib	INDRA (drugs)
BAX	chebi:CHEBI:7421	nac	INDRA (drugs)
BAX	mirna:hsa-miR-1-3p		AILANI
BAX	mirna:hsa-miR-504-5p		AILANI
BAX	mirna:hsa-miR-766-3p		AILANI
BAX	mirna:hsa-miR-365a-3p		AILANI
BAX	mirna:hsa-miR-298		AILANI
BAX	mirna:hsa-miR-214-3p		AILANI
BAX	mirna:hsa-miR-30a-5p		AILANI
CASP7	chebi:CHEBI:15746	spermine	INDRA (drugs)
CASP7	chebi:CHEBI:16509	1,4-benzoquinone	INDRA (drugs)
CASP7	chebi:CHEBI:16796	melatonin	INDRA (drugs)
CASP7	chebi:CHEBI:18388	apigenin	INDRA (drugs)
CASP7	chebi:CHEBI:27363	zinc atom	INDRA (drugs)
CASP7	chebi:CHEBI:27899	cisplatin	INDRA (drugs)
CASP7	chebi:CHEBI:59385	ac-asp-glu-val-asp-h	INDRA (drugs)
CASP7	chebi:CHEBI:7421	nac	INDRA (drugs)
CASP7	drugbank:DB05408	emricasan	INDRA (drugs)
CASP7	mirna:hsa-miR-106a-5p		AILANI
CASP7	mirna:hsa-miR-106b-5p		AILANI
CASP7	mirna:hsa-miR-122-5p		AILANI
CASP7	mirna:hsa-miR-132-3p		AILANI
CASP7	mirna:hsa-miR-192-5p		AILANI
CASP7	mirna:hsa-miR-215-5p		AILANI
CASP7	mirna:hsa-miR-26b-5p		AILANI
CASP7	mirna:hsa-miR-484		AILANI
CUL3	chebi:CHEBI:145535	pevonedistat	INDRA (drugs)
CUL3	chebi:CHEBI:16136	hydrogen sulfide	INDRA (drugs)
CUL3	chebi:CHEBI:50845	doxycycline	INDRA (drugs)
CUL3	chebi:CHEBI:63637	vemurafenib	INDRA (drugs)
CUL3	mirna:hsa-let-7b-5p		AILANI
CUL3	mirna:hsa-miR-10a-5p		AILANI
CUL3	mirna:hsa-miR-1266-3p		AILANI
CUL3	mirna:hsa-miR-130a-3p		AILANI
CUL3	mirna:hsa-miR-130b-3p		AILANI
CUL3	mirna:hsa-miR-15a-5p		AILANI
CUL3	mirna:hsa-miR-15b-5p		AILANI
CUL3	mirna:hsa-miR-16-5p		AILANI
CUL3	mirna:hsa-miR-18a-3p		AILANI
CUL3	mirna:hsa-miR-192-5p		AILANI
CUL3	mirna:hsa-miR-195-5p		AILANI
CUL3	mirna:hsa-miR-203a-3p		AILANI
CUL3	mirna:hsa-miR-218-5p		AILANI
CUL3	mirna:hsa-miR-301a-3p		AILANI
CUL3	mirna:hsa-miR-301b-3p		AILANI
CUL3	mirna:hsa-miR-302a-3p		AILANI
CUL3	mirna:hsa-miR-302b-3p		AILANI
CUL3	mirna:hsa-miR-302c-3p		AILANI
CUL3	mirna:hsa-miR-302d-3p		AILANI
CUL3	mirna:hsa-miR-302e		AILANI
CUL3	mirna:hsa-miR-3120-3p		AILANI
CUL3	mirna:hsa-miR-3177-5p		AILANI
CUL3	mirna:hsa-miR-339-5p		AILANI
CUL3	mirna:hsa-miR-3529-5p		AILANI
CUL3	mirna:hsa-miR-3613-5p		AILANI
CUL3	mirna:hsa-miR-3666		AILANI
CUL3	mirna:hsa-miR-372-3p		AILANI
CUL3	mirna:hsa-miR-373-3p		AILANI
CUL3	mirna:hsa-miR-379-5p		AILANI
CUL3	mirna:hsa-miR-424-5p		AILANI
CUL3	mirna:hsa-miR-4295		AILANI
CUL3	mirna:hsa-miR-4451		AILANI
CUL3	mirna:hsa-miR-4477a		AILANI
CUL3	mirna:hsa-miR-4524a-5p		AILANI
CUL3	mirna:hsa-miR-4524b-5p		AILANI
CUL3	mirna:hsa-miR-4536-5p		AILANI
CUL3	mirna:hsa-miR-454-3p		AILANI
CUL3	mirna:hsa-miR-4635		AILANI
CUL3	mirna:hsa-miR-4650-3p		AILANI
CUL3	mirna:hsa-miR-1225-3p		AILANI
CUL3	mirna:hsa-miR-1233-3p		AILANI
CUL3	mirna:hsa-miR-1265		AILANI
CUL3	mirna:hsa-miR-520b		AILANI
CUL3	mirna:hsa-miR-520d-3p		AILANI
CUL3	mirna:hsa-miR-520e		AILANI
CUL3	mirna:hsa-miR-591		AILANI
CUL3	mirna:hsa-miR-646		AILANI
CUL3	mirna:hsa-miR-670-5p		AILANI
CUL3	mirna:hsa-miR-6734-3p		AILANI
CUL3	mirna:hsa-miR-6807-5p		AILANI
CUL3	mirna:hsa-miR-6838-5p		AILANI
CUL3	mirna:hsa-miR-99a-5p		AILANI
CUL3	mirna:hsa-miR-4668-3p		AILANI
CUL3	mirna:hsa-miR-4705		AILANI
CUL3	mirna:hsa-miR-4764-5p		AILANI
CUL3	mirna:hsa-miR-497-5p		AILANI
CUL3	mirna:hsa-miR-503-5p		AILANI
CUL3	mirna:hsa-miR-511-3p		AILANI
CUL3	mirna:hsa-miR-5197-3p		AILANI
CUL3	mirna:hsa-miR-519a-3p		AILANI
CUL3	mirna:hsa-miR-519b-3p		AILANI
CUL3	mirna:hsa-miR-519c-3p		AILANI
CUL3	mirna:hsa-miR-520a-3p		AILANI
CUL3	mirna:hsa-miR-520c-3p		AILANI
EGFR	drugbank:DB15327	abivertinib	Clinical Trials DB
EGFR	drugbank:DB15035	zanubrutinib	Clinical Trials DB
FADD	chebi:CHEBI:23924	enzyme inhibitor	INDRA (drugs)
FADD	mirna:hsa-miR-1-3p		AILANI
FADD	mirna:hsa-miR-155-5p		AILANI
FADD	mirna:hsa-miR-15b-5p		AILANI
FADD	mirna:hsa-miR-7-5p		AILANI
FADD	chebi:CHEBI:26216	potassium atom	INDRA (drugs)
FADD	chebi:CHEBI:27958	cocaine	INDRA (drugs)
FADD	chebi:CHEBI:35998	tridecane	INDRA (drugs)
FADD	mesh:C056218	ml 9	INDRA (drugs)
FADD	chebi:CHEBI:68481	mtor inhibitor	INDRA (drugs)
FADD	chebi:CHEBI:78761	ml-7	INDRA (drugs)
FADD	chebi:CHEBI:7421	nac	INDRA (drugs)
FADD	mirna:hsa-miR-128-3p		AILANI
FADD	mirna:hsa-miR-146a-5p		AILANI
FOS	mirna:hsa-miR-6872-3p		AILANI
FOS	chebi:CHEBI:4806	(-)-epigallocatechin 3-gallate	INDRA (drugs)
FOS	mirna:hsa-miR-6816-3p		AILANI
FOS	chebi:CHEBI:16236	ethanol	INDRA (drugs)
FOS	chebi:CHEBI:58097	morphine(1+)	INDRA (drugs)
FOS	mirna:hsa-miR-6885-3p		AILANI
FOS	mirna:hsa-miR-1234-3p		AILANI
FOS	chebi:CHEBI:6067	isotretinoin	INDRA (drugs)
FOS	chebi:CHEBI:3962	curcumin	INDRA (drugs)
FOS	mirna:hsa-miR-29a-3p		AILANI
FOS	chebi:CHEBI:28939	n-acetyl-l-cysteine	INDRA (drugs)
FOS	mirna:hsa-miR-222-3p		AILANI
FOS	mirna:hsa-miR-627-5p		AILANI
FOS	chebi:CHEBI:28304	heparin	INDRA (drugs)
FOS	mirna:hsa-miR-6504-3p		AILANI
FOS	mirna:hsa-miR-6854-3p		AILANI
FOS	mirna:hsa-miR-619-5p		AILANI
FOS	mirna:hsa-miR-770-5p		AILANI
FOS	mirna:hsa-miR-8080		AILANI
FOS	chebi:CHEBI:27958	cocaine	INDRA (drugs)
FOS	mirna:hsa-miR-139-5p		AILANI
FOS	mirna:hsa-miR-7107-5p		AILANI
FOS	mirna:hsa-miR-7151-3p		AILANI
FOS	mirna:hsa-miR-155-5p		AILANI
FOS	mirna:hsa-miR-19a-5p		AILANI
FOS	mirna:hsa-miR-19b-1-5p		AILANI
FOS	mirna:hsa-miR-215-5p		AILANI
FOS	mirna:hsa-miR-221-3p		AILANI
FOS	drugbank:DB00852	pseudoephedrine	AILANI
FOS	mirna:hsa-miR-543		AILANI
FOS	mirna:hsa-miR-548v		AILANI
FOS	mirna:hsa-miR-5581-3p		AILANI
FOS	mirna:hsa-miR-5586-5p		AILANI
FOS	mirna:hsa-miR-187-5p		AILANI
FOS	mirna:hsa-miR-192-5p		AILANI
FOS	mirna:hsa-miR-6508-3p		AILANI
FOS	mirna:hsa-miR-101-3p		AILANI
FOS	mirna:hsa-miR-1292-3p		AILANI
FOS	mirna:hsa-miR-8083		AILANI
FOS	mirna:hsa-miR-937-5p		AILANI
FOS	mirna:hsa-miR-6077		AILANI
FOS	mirna:hsa-miR-181b-5p		AILANI
FOS	mirna:hsa-miR-19b-2-5p		AILANI
FOS	mirna:hsa-miR-4640-5p		AILANI
FOS	mirna:hsa-miR-5089-3p		AILANI
FOS	mirna:hsa-miR-5095		AILANI
FOS	mirna:hsa-miR-181a-5p		AILANI
FOS	mirna:hsa-miR-4733-3p		AILANI
FOS	pubchem.compound:22833565	heparin	INDRA (drugs)
FOS	mirna:hsa-miR-490-5p		AILANI
FOS	mirna:hsa-miR-493-5p		AILANI
FOS	mirna:hsa-miR-29b-3p		AILANI
FOS	mirna:hsa-miR-3065-3p		AILANI
FOS	mirna:hsa-miR-4530		AILANI
FOS	mirna:hsa-miR-338-3p		AILANI
FOS	mirna:hsa-miR-29c-3p		AILANI
FOS	mirna:hsa-miR-323b-3p		AILANI
FOS	mirna:hsa-miR-8081		AILANI
FOS	mirna:hsa-miR-3622b-5p		AILANI
FOS	mirna:hsa-miR-4438		AILANI
FOS	mirna:hsa-miR-335-5p		AILANI
FOS	mirna:hsa-miR-4726-5p		AILANI
FOSL1	mirna:hsa-miR-4271		AILANI
FOSL1	mirna:hsa-miR-7109-5p		AILANI
FOSL1	mirna:hsa-miR-7106-5p		AILANI
FOSL1	mirna:hsa-miR-4784		AILANI
FOSL1	mirna:hsa-miR-34a-5p		AILANI
FOSL1	mirna:hsa-miR-4747-5p		AILANI
FOSL1	mirna:hsa-miR-4472		AILANI
FOSL1	mirna:hsa-miR-4723-5p		AILANI
FOSL1	mirna:hsa-miR-5196-5p		AILANI
FOSL1	mirna:hsa-miR-6870-5p		AILANI
FOSL1	mirna:hsa-miR-34c-5p		AILANI
FOSL1	mirna:hsa-miR-4725-3p		AILANI
FOSL1	mirna:hsa-miR-4665-5p		AILANI
FOSL1	mirna:hsa-miR-6825-5p		AILANI
FOSL1	mirna:hsa-miR-765		AILANI
FOSL1	mirna:hsa-miR-92a-2-5p		AILANI
FOSL1	mirna:hsa-miR-5010-5p		AILANI
FOSL1	mirna:hsa-miR-3202		AILANI
FOSL1	mirna:hsa-miR-33a-5p		AILANI
FOSL1	mirna:hsa-miR-4525		AILANI
FOSL1	mirna:hsa-miR-6786-5p		AILANI
FOSL1	mirna:hsa-miR-7111-5p		AILANI
FOSL1	mirna:hsa-miR-5698		AILANI
FOSL1	mirna:hsa-miR-4447		AILANI
FOSL1	mirna:hsa-miR-138-5p		AILANI
FOSL1	mirna:hsa-miR-1207-3p		AILANI
FOSL1	mirna:hsa-miR-6780b-5p		AILANI
FOSL1	mirna:hsa-miR-625-5p		AILANI
FOSL1	mirna:hsa-miR-1275		AILANI
FOSL1	mirna:hsa-miR-3150b-3p		AILANI
FOSL1	mirna:hsa-miR-3179		AILANI
HMOX1	mirna:hsa-miR-196a-5p		AILANI
HMOX1	mirna:hsa-miR-216a-3p		AILANI
HMOX1	mirna:hsa-miR-4498		AILANI
HMOX1	mirna:hsa-miR-4691-5p		AILANI
HMOX1	mirna:hsa-miR-3126-5p		AILANI
HMOX1	mirna:hsa-miR-4721		AILANI
HMOX1	mirna:hsa-miR-24-3p		AILANI
HMOX1	mirna:hsa-miR-16-5p		AILANI
HMOX1	mirna:hsa-miR-5193		AILANI
HMOX1	mirna:hsa-miR-520a-5p		AILANI
HMOX1	mirna:hsa-miR-5001-5p		AILANI
HMOX1	mirna:hsa-miR-26b-5p		AILANI
HMOX1	mirna:hsa-miR-4430		AILANI
HMOX1	mirna:hsa-miR-4443		AILANI
HMOX1	mirna:hsa-miR-4446-3p		AILANI
HMOX1	mirna:hsa-miR-4448		AILANI
HMOX1	mirna:hsa-miR-4492		AILANI
HMOX1	mirna:hsa-miR-3135b		AILANI
HMOX1	mirna:hsa-miR-3180-5p		AILANI
HMOX1	mirna:hsa-miR-5008-5p		AILANI
HMOX1	mirna:hsa-miR-3612		AILANI
HMOX1	mirna:hsa-miR-3652		AILANI
HMOX1	mirna:hsa-miR-3667-3p		AILANI
HMOX1	mirna:hsa-miR-3681-3p		AILANI
HMOX1	chebi:CHEBI:7421	nac	INDRA (drugs)
HMOX1	drugbank:DB00157	nadh	AILANI
HMOX1	mirna:hsa-miR-525-5p		AILANI
HMOX1	mirna:hsa-miR-5590-5p		AILANI
HMOX1	mirna:hsa-miR-650		AILANI
HMOX1	mirna:hsa-miR-660-3p		AILANI
HMOX1	chebi:CHEBI:15430	protoporphyrin	INDRA (drugs)
HMOX1	chebi:CHEBI:16412	lipopolysaccharide	INDRA (drugs)
HMOX1	chebi:CHEBI:17245	carbon monoxide	INDRA (drugs)
HMOX1	chebi:CHEBI:18248	iron atom	INDRA (drugs)
HMOX1	chebi:CHEBI:26523	reactive oxygen species	INDRA (drugs)
HMOX1	chebi:CHEBI:27007	tin atom	INDRA (drugs)
HMOX1	chebi:CHEBI:28783	zinc protoporphyrin	INDRA (drugs)
HMOX1	mirna:hsa-miR-1291		AILANI
HMOX1	mirna:hsa-miR-148b-3p		AILANI
HMOX1	mirna:hsa-miR-762		AILANI
HMOX1	mirna:hsa-miR-7845-5p		AILANI
HMOX1	mirna:hsa-miR-7976		AILANI
HMOX1	pubchem.compound:53481561	protoporphyrin	INDRA (drugs)
HMOX1	mirna:hsa-miR-335-5p		AILANI
HMOX1	drugbank:DB03906	2-phenylheme	AILANI
HMOX1	drugbank:DB01942	formic acid	AILANI
HMOX1	drugbank:DB02073	biliverdine ix alpha	AILANI
HMOX1	drugbank:DB02468	12-phenylheme	AILANI
HMOX1	drugbank:DB04912	stannsoporfin	AILANI
HMOX1	drugbank:DB06914	1-({2-[2-(4-chlorophenyl)ethyl]-1,3-dioxolan-2-yl}methyl)-1h-imidazole	AILANI
HMOX1	drugbank:DB07342	1-(adamantan-1-yl)-2-(1h-imidazol-1-yl)ethanone	AILANI
HMOX1	mesh:C032628	tin protoporphyrin ix	INDRA (drugs)
HMOX1	mirna:hsa-miR-1-3p		AILANI
HMOX1	mirna:hsa-miR-122-5p		AILANI
HMOX1	mirna:hsa-miR-124-3p		AILANI
HMOX1	mirna:hsa-miR-128-3p		AILANI
HMOX1	mirna:hsa-miR-6875-5p		AILANI
HMOX1	mirna:hsa-miR-6758-5p		AILANI
HMOX1	mirna:hsa-miR-6775-3p		AILANI
HMOX1	mirna:hsa-miR-6792-3p		AILANI
HMOX1	mirna:hsa-miR-6856-5p		AILANI
HMOX1	mirna:hsa-miR-6873-5p		AILANI
HMOX1	mirna:hsa-miR-6749-3p		AILANI
HMOX1	mirna:hsa-miR-6734-3p		AILANI
IFIH1	pubchem.compound:86583374	poly i:c	INDRA (drugs)
IFIH1	mirna:hsa-miR-29b-3p		AILANI
IFIH1	mirna:hsa-miR-424-5p		AILANI
IFIH1	chebi:CHEBI:27899	cisplatin	INDRA (drugs)
IFIH1	mirna:hsa-miR-15b-5p		AILANI
IFIH1	mirna:hsa-miR-26b-5p		AILANI
IFIH1	chebi:CHEBI:47916	flavonoid	INDRA (drugs)
IFIH1	chebi:CHEBI:61695	l-prolylglycine	INDRA (drugs)
IFIH1	chebi:CHEBI:24996	lactate	INDRA (drugs)
IKBKE	chebi:CHEBI:49786	nickel(2+)	INDRA (drugs)
IKBKE	chebi:CHEBI:49468	silver(1+)	INDRA (drugs)
IKBKE	chebi:CHEBI:32692	4-(n-nitrosomethylamino)-1-(3-pyridyl)butan-1-one	INDRA (drugs)
IKBKE	chebi:CHEBI:73888	gly-asn	INDRA (drugs)
IKBKE	chebi:CHEBI:91439	n-[3-[[5-iodo-4-[3-[[oxo(thiophen-2-yl)methyl]amino]propylamino]-2-pyrimidinyl]amino]phenyl]-1-pyrrolidinecarboxamide	INDRA (drugs)
IKBKE	chebi:CHEBI:31205	amlexanox	INDRA (drugs)
IKBKE	mirna:hsa-miR-155-5p		AILANI
IKBKE	pubchem.compound:3086686	sunitinib	INDRA (drugs)
IKBKE	chembl.compound:CHEMBL1567	sunitinib malate	INDRA (drugs)
IKBKE	mirna:hsa-miR-124-3p		AILANI
IKBKE	mirna:hsa-miR-296-5p		AILANI
IKBKE	chebi:CHEBI:124930	n-[3-[[5-cyclopropyl-2-[3-(4-morpholinylmethyl)anilino]-4-pyrimidinyl]amino]propyl]cyclobutanecarboxamide	INDRA (drugs)
IRF3	chebi:CHEBI:67208	double-stranded rna	INDRA (drugs)
IRF3	pubchem.compound:86583374	poly i:c, polyinosinic-polycytidylic acid	INDRA (drugs)
IRF3	chebi:CHEBI:3962	curcumin	INDRA (drugs)
IRF3	chebi:CHEBI:16412	lipopolysaccharide	INDRA (drugs)
IRF3	chebi:CHEBI:67208	double-stranded rna	INDRA (drugs)
IRF3	pubchem.compound:86583374	poly i:c, polyinosinic-polycytidylic acid	INDRA (drugs)
IRF3	chebi:CHEBI:3962	curcumin	INDRA (drugs)
IRF3	chebi:CHEBI:16412	lipopolysaccharide	INDRA (drugs)
IRF7	chebi:CHEBI:6375	lansoprazole	INDRA (drugs)
IRF7	mirna:hsa-miR-146a-5p		AILANI
IRF7	chebi:CHEBI:49786	nickel(2+)	INDRA (drugs)
IRF7	pubchem.compound:5469318	aktip	INDRA (drugs)
IRF7	chebi:CHEBI:15367	all-trans-retinoic acid	INDRA (drugs)
IRF7	chebi:CHEBI:28177	theophylline	INDRA (drugs)
IRF9	chebi:CHEBI:46024	trichostatin a	INDRA (drugs)
IRF9	chebi:CHEBI:4031	cyclosporin a	INDRA (drugs)
IRF9	mirna:hsa-miR-106b-5p		AILANI
IRF9	chebi:CHEBI:23924	enzyme inhibitor	INDRA (drugs)
IRF9	chebi:CHEBI:17650	cortisol	INDRA (drugs)
IRF9	chebi:CHEBI:15738	staurosporine	INDRA (drugs)
ISG15	chebi:CHEBI:80630	irinotecan	INDRA (drugs)
ISG15	chebi:CHEBI:26536	retinoic acid	INDRA (drugs)
ISG15	mirna:hsa-miR-1-3p		AILANI
ISG15	chebi:CHEBI:3165	bradykinin	INDRA (drugs)
ISG15	mirna:hsa-miR-146a-5p		AILANI
ISG15	chebi:CHEBI:16234	hydroxide	INDRA (drugs)
ISG15	chebi:CHEBI:16480	nitric oxide	INDRA (drugs)
ISG15	chebi:CHEBI:15367	all-trans-retinoic acid	INDRA (drugs)
JUN	mirna:hsa-miR-26b-5p		AILANI
JUN	mirna:hsa-miR-3178		AILANI
JUN	mirna:hsa-miR-3691-3p		AILANI
JUN	mirna:hsa-miR-29c-3p		AILANI
JUN	mirna:hsa-miR-3653-3p		AILANI
JUN	mirna:hsa-miR-30a-5p		AILANI
JUN	mirna:hsa-miR-4756-5p		AILANI
JUN	mirna:hsa-miR-4804-3p		AILANI
JUN	mirna:hsa-miR-200b-3p		AILANI
JUN	mirna:hsa-miR-4739		AILANI
JUN	mirna:hsa-miR-2681-5p		AILANI
JUN	mirna:hsa-miR-4783-5p		AILANI
JUN	mirna:hsa-miR-633		AILANI
JUN	mirna:hsa-miR-155-5p		AILANI
JUN	mirna:hsa-miR-6883-5p		AILANI
JUN	mirna:hsa-miR-203a-3p		AILANI
JUN	mirna:hsa-miR-655-3p		AILANI
JUN	mirna:hsa-miR-342-3p		AILANI
JUN	mirna:hsa-miR-101-3p		AILANI
JUN	mirna:hsa-miR-1321		AILANI
JUN	mirna:hsa-miR-4328		AILANI
JUN	mirna:hsa-miR-6785-5p		AILANI
JUN	mirna:hsa-miR-16-5p		AILANI
JUN	mirna:hsa-miR-4728-5p		AILANI
JUN	mirna:hsa-miR-200c-3p		AILANI
JUN	mirna:hsa-miR-15a-5p		AILANI
JUN	mirna:hsa-miR-4480		AILANI
JUN	mirna:hsa-miR-374c-5p		AILANI
JUN	drugbank:DB01169	arsenic trioxide	AILANI
JUN	mirna:hsa-miR-139-5p		AILANI
JUN	mirna:hsa-miR-149-3p		AILANI
JUN	mirna:hsa-miR-4720-3p		AILANI
JUN	mirna:hsa-miR-429		AILANI
JUN	mirna:hsa-miR-149-5p		AILANI
JUN	chebi:CHEBI:15368	acrolein	INDRA (drugs)
JUN	mirna:hsa-miR-4724-5p		AILANI
JUN	drugbank:DB00852	pseudoephedrine	AILANI
JUN	drugbank:DB01029	irbesartan	AILANI
JUN	chebi:CHEBI:15864	luteolin	INDRA (drugs)
JUN	drugbank:DB00570	vinblastine	AILANI
JUN	chebi:CHEBI:50694	minocycline	INDRA (drugs)
JUN	mirna:hsa-miR-8084		AILANI
JUN	mirna:hsa-miR-93-5p		AILANI
JUN	chebi:CHEBI:4806	(-)-epigallocatechin 3-gallate	INDRA (drugs)
JUN	chebi:CHEBI:27881	resveratrol	INDRA (drugs)
JUN	chebi:CHEBI:90695	anthra[1,9-cd]pyrazol-6(2h)-one	INDRA (drugs)
JUN	chebi:CHEBI:16412	lipopolysaccharide	INDRA (drugs)
JUN	chebi:CHEBI:17489	3',5'-cyclic amp	INDRA (drugs)
JUN	chebi:CHEBI:16243	quercetin	INDRA (drugs)
JUN	chebi:CHEBI:3962	curcumin	INDRA (drugs)
JUND	mirna:hsa-miR-4778-3p		AILANI
JUND	mirna:hsa-miR-6787-5p		AILANI
JUND	mirna:hsa-miR-4695-5p		AILANI
JUND	mirna:hsa-miR-4755-3p		AILANI
JUND	mirna:hsa-miR-4725-3p		AILANI
JUND	chebi:CHEBI:15414	s-adenosyl-l-methionine	INDRA (drugs)
JUND	pubchem.compound:5353940	sb202190	INDRA (drugs)
JUND	mirna:hsa-miR-6891-5p		AILANI
JUND	mirna:hsa-miR-6780b-5p		AILANI
JUND	chebi:CHEBI:15864	luteolin	INDRA (drugs)
JUND	mirna:hsa-miR-625-5p		AILANI
JUND	mirna:hsa-miR-663a		AILANI
JUND	mirna:hsa-miR-335-5p		AILANI
JUND	mirna:hsa-miR-4271		AILANI
JUND	mirna:hsa-miR-4707-5p		AILANI
JUND	mirna:hsa-miR-6875-3p		AILANI
JUND	mirna:hsa-miR-3173-3p		AILANI
JUND	pubchem.compound:4611	oxamflatin	INDRA (drugs)
JUND	chebi:CHEBI:27881	resveratrol	INDRA (drugs)
JUND	chebi:CHEBI:27958	cocaine	INDRA (drugs)
JUND	chebi:CHEBI:37537	phorbol 13-acetate 12-myristate	INDRA (drugs)
JUND	mirna:hsa-miR-3185		AILANI
JUND	chebi:CHEBI:5181	fucoidan	INDRA (drugs)
JUND	mirna:hsa-miR-1908-5p		AILANI
JUND	mirna:hsa-miR-186-5p		AILANI
KEAP1	chebi:CHEBI:31697	indolin-2-one	INDRA (drugs)
KEAP1	chebi:CHEBI:3259	cccp	INDRA (drugs)
KEAP1	chebi:CHEBI:8198	trans-piceid	INDRA (drugs)
KEAP1	chebi:CHEBI:76004	dimethyl fumarate	INDRA (drugs)
KEAP1	chebi:CHEBI:77733	2-(3,4-dimethoxyphenyl)-5-\{[2-(3,4-dimethoxyphenyl)ethyl](methyl)amino\}-2-(propan-2-yl)pentanenitrile	INDRA (drugs)
KEAP1	chebi:CHEBI:15948	lycopene	INDRA (drugs)
KEAP1	chebi:CHEBI:16243	quercetin	INDRA (drugs)
KEAP1	chebi:CHEBI:26523	reactive oxygen species	INDRA (drugs)
KEAP1	chebi:CHEBI:27881	resveratrol	INDRA (drugs)
KEAP1	drugbank:DB05983	bardoxolone methyl	INDRA (drugs)
KEAP1	drugbank:DB08908	dimethyl fumarate	AILANI
KEAP1	mirna:hsa-miR-141-3p		AILANI
KEAP1	mirna:hsa-miR-200a-3p		AILANI
KEAP1	mirna:hsa-miR-26b-5p		AILANI
KEAP1	mirna:hsa-miR-7-5p		AILANI
KEAP1	mirna:hsa-miR-92b-3p		AILANI
LNPEP	mirna:hsa-miR-128-3p		AILANI
LNPEP	mirna:hsa-miR-1197		AILANI
LNPEP	mirna:hsa-miR-1253		AILANI
LNPEP	mirna:hsa-miR-362-3p		AILANI
LNPEP	mirna:hsa-miR-1237-3p		AILANI
LNPEP	mirna:hsa-miR-148a-3p		AILANI
LNPEP	mirna:hsa-miR-5705		AILANI
LNPEP	mirna:hsa-miR-603		AILANI
LNPEP	mirna:hsa-miR-5196-3p		AILANI
LNPEP	mirna:hsa-miR-539-3p		AILANI
LNPEP	mirna:hsa-miR-5007-3p		AILANI
LNPEP	mirna:hsa-miR-548aw		AILANI
LNPEP	mirna:hsa-miR-548f-5p		AILANI
LNPEP	mirna:hsa-miR-133a-5p		AILANI
LNPEP	mirna:hsa-miR-1250-3p		AILANI
LNPEP	mirna:hsa-miR-3689e		AILANI
LNPEP	mirna:hsa-miR-138-5p		AILANI
LNPEP	mirna:hsa-miR-1468-3p		AILANI
LNPEP	mirna:hsa-miR-379-5p		AILANI
LNPEP	mirna:hsa-miR-8485		AILANI
LNPEP	mirna:hsa-miR-3941		AILANI
LNPEP	mirna:hsa-miR-4302		AILANI
LNPEP	mirna:hsa-miR-4451		AILANI
LNPEP	mirna:hsa-miR-548aj-5p		AILANI
LNPEP	mirna:hsa-miR-4524a-3p		AILANI
LNPEP	mirna:hsa-miR-3124-3p		AILANI
LNPEP	mirna:hsa-miR-548g-5p		AILANI
LNPEP	mirna:hsa-miR-548x-5p		AILANI
LNPEP	mirna:hsa-miR-5692a		AILANI
LNPEP	mirna:hsa-miR-3681-3p		AILANI
LNPEP	mirna:hsa-miR-3689f		AILANI
LNPEP	mirna:hsa-miR-4804-3p		AILANI
LNPEP	mirna:hsa-miR-485-3p		AILANI
LNPEP	chebi:CHEBI:95044	(2s)-2-[[(2r)-2-[(1s)-1-hydroxy-2-(hydroxyamino)-2-oxoethyl]-4-methyl-1-oxopentyl]amino]-2-phenylacetic acid cyclopentyl ester	INDRA (drugs)
LNPEP	mirna:hsa-miR-512-3p		AILANI
LNPEP	chebi:CHEBI:36773	camphor	INDRA (drugs)
LNPEP	mirna:hsa-miR-4469		AILANI
LNPEP	mirna:hsa-miR-216a-3p		AILANI
LNPEP	mirna:hsa-miR-218-5p		AILANI
LNPEP	mirna:hsa-miR-329-3p		AILANI
LNPEP	mirna:hsa-miR-3529-5p		AILANI
LNPEP	mirna:hsa-miR-361-5p		AILANI
LNPEP	mirna:hsa-miR-6858-5p		AILANI
LNPEP	mirna:hsa-miR-6868-3p		AILANI
LNPEP	mirna:hsa-miR-3689a-5p		AILANI
LNPEP	mirna:hsa-miR-3689b-5p		AILANI
LNPEP	mirna:hsa-miR-148b-3p		AILANI
LNPEP	mirna:hsa-miR-152-3p		AILANI
LNPEP	mirna:hsa-miR-153-5p		AILANI
LNPEP	mirna:hsa-miR-1-3p		AILANI
LNPEP	mirna:hsa-miR-30e-3p		AILANI
LNPEP	mirna:hsa-miR-6783-5p		AILANI
LNPEP	mirna:hsa-miR-6844		AILANI
LNPEP	mirna:hsa-miR-4704-3p		AILANI
LNPEP	mirna:hsa-miR-4720-3p		AILANI
LNPEP	mirna:hsa-miR-4797-5p		AILANI
LNPEP	chebi:CHEBI:16236	ethanol	INDRA (drugs)
LNPEP	mirna:hsa-miR-8080		AILANI
LNPEP	mirna:hsa-miR-877-5p		AILANI
LNPEP	pubchem.compound:53481368	prostaglandins	INDRA (drugs)
LNPEP	mirna:hsa-miR-18a-3p		AILANI
LNPEP	mirna:hsa-miR-4697-3p		AILANI
LNPEP	chebi:CHEBI:16914	salicylic acid	INDRA (drugs)
LNPEP	mirna:hsa-miR-6770-5p		AILANI
LNPEP	mirna:hsa-miR-4689		AILANI
LNPEP	chebi:CHEBI:16794	scopolamine	INDRA (drugs)
LNPEP	mirna:hsa-miR-744-5p		AILANI
LNPEP	chebi:CHEBI:26523	reactive oxygen species	INDRA (drugs)
LNPEP	mirna:hsa-miR-6888-5p		AILANI
LNPEP	mirna:hsa-miR-6131		AILANI
LNPEP	mirna:hsa-miR-6749-3p		AILANI
LNPEP	mirna:hsa-miR-4650-3p		AILANI
LNPEP	mirna:hsa-miR-636		AILANI
MAS1	chebi:CHEBI:16134	ammonia	INDRA (drugs)
MAS1	chebi:CHEBI:15355	acetylcholine	INDRA (drugs)
MAS1	chebi:CHEBI:28082	5alpha-cholestane-3beta,5,6beta-triol	INDRA (drugs)
MAS1	chebi:CHEBI:16680	s-adenosyl-l-homocysteine	INDRA (drugs)
MAS1	chebi:CHEBI:18421	superoxide	INDRA (drugs)
MBTPS1	chebi:CHEBI:48706	antagonist	INDRA (drugs)
MBTPS1	chebi:CHEBI:15365	acetylsalicylic acid	INDRA (drugs)
MBTPS1	chebi:CHEBI:90705	sb 203580	INDRA (drugs)
MBTPS1	mirna:hsa-miR-193b-3p		AILANI
MBTPS1	mirna:hsa-let-7c-5p		AILANI
MBTPS1	chebi:CHEBI:63112	fingolimod hydrochloride	INDRA (drugs)
MBTPS1	mirna:hsa-miR-769-3p		AILANI
MBTPS1	pubchem.compound:5353940	sb202190	INDRA (drugs)
MBTPS1	mesh:C046235	3,4-dichloroisocoumarin	INDRA (drugs)
NFKB1	mirna:mmu-miR-210-3p		AILANI
NFKB1	mirna:hsa-miR-15a-5p		AILANI
NFKB1	mirna:hsa-miR-16-5p		AILANI
NFKB1	mirna:hsa-miR-199a-5p		AILANI
NFKB1	drugbank:DB01411	pranlukast	AILANI
NFKB1	drugbank:DB08814	triflusal	AILANI
NFKB1	mirna:hsa-miR-92a-3p		AILANI
NFKB1	drugbank:DB00945	acetylsalicylic acid	AILANI
NFKB1	mirna:hsa-miR-146b-5p		AILANI
NFKB1	mirna:hsa-miR-21-5p		AILANI
NFKB1	mirna:hsa-miR-9-5p		AILANI
NFKB1	chebi:CHEBI:74947	2-(2,6-dioxopiperidin-3-yl)-1h-isoindole-1,3(2h)-dione	INDRA (drugs)
NFKB1	chebi:CHEBI:15365	acetylsalicylic acid	INDRA (drugs)
NFKB1	mirna:hsa-miR-155-5p		AILANI
NFKB1	mirna:hsa-miR-146a-5p		AILANI
NFKB1	chebi:CHEBI:16480	nitric oxide	INDRA (drugs)
NFKB1	chebi:CHEBI:52717	bortezomib	INDRA (drugs)
NFKB1	mirna:hsa-miR-139-5p		AILANI
NFKB1	chebi:CHEBI:16412	lipopolysaccharide	INDRA (drugs)
NFKB1	chebi:CHEBI:3962	curcumin	INDRA (drugs)
NFKB1	mirna:hsa-let-7a-5p		AILANI
NFKB1	chebi:CHEBI:28939	n-acetyl-l-cysteine	INDRA (drugs)
NFKB1	chebi:CHEBI:29101	sodium(1+)	INDRA (drugs)
NFKB1	mirna:hsa-miR-26b-5p		AILANI
NFKB1	chebi:CHEBI:45716	vorinostat	INDRA (drugs)
NFKB1	chebi:CHEBI:16914	salicylic acid	INDRA (drugs)
OAS1	pubchem.compound:22833565	heparin	INDRA (drugs)
OAS1	chebi:CHEBI:27363	zinc atom	INDRA (drugs)
OAS1	mirna:hsa-miR-335-5p		AILANI
OAS1	chebi:CHEBI:67208	double-stranded rna	INDRA (drugs)
OAS2	mirna:hsa-miR-1270		AILANI
OAS2	mirna:hsa-miR-6823-3p		AILANI
OAS2	mirna:hsa-miR-1199-5p		AILANI
OAS2	chebi:CHEBI:27363	zinc atom	INDRA (drugs)
OAS2	chebi:CHEBI:9168	sirolimus	INDRA (drugs)
OAS2	mirna:hsa-miR-6751-3p		AILANI
OAS2	mirna:hsa-miR-185-5p		AILANI
OAS2	mirna:hsa-miR-132-3p		AILANI
OAS2	mirna:hsa-miR-4670-3p		AILANI
OAS2	mirna:hsa-miR-7-5p		AILANI
OAS2	mirna:hsa-miR-148a-5p		AILANI
OAS2	mirna:hsa-miR-4644		AILANI
OAS2	mirna:hsa-miR-4531		AILANI
OAS2	chebi:CHEBI:4875	etanercept	INDRA (drugs)
OAS2	mirna:hsa-miR-620		AILANI
OAS2	mirna:hsa-miR-5192		AILANI
OAS2	mirna:hsa-miR-3616-5p		AILANI
OAS2	mirna:hsa-miR-573		AILANI
OAS2	mirna:hsa-miR-2114-3p		AILANI
OAS2	mirna:hsa-miR-335-5p		AILANI
OAS2	mirna:hsa-miR-4635		AILANI
OAS2	mirna:hsa-miR-4306		AILANI
OAS3	mirna:hsa-miR-4708-5p		AILANI
OAS3	mirna:hsa-miR-502-5p		AILANI
OAS3	mirna:hsa-miR-6088		AILANI
OAS3	mirna:hsa-miR-1273f		AILANI
OAS3	mirna:hsa-miR-4770		AILANI
OAS3	chebi:CHEBI:4875	etanercept	INDRA (drugs)
OAS3	mirna:hsa-miR-143-3p		AILANI
RBX1	mirna:hsa-miR-194-5p		AILANI
RBX1	chebi:CHEBI:72690	pomalidomide	INDRA (drugs)
RBX1	mirna:hsa-miR-188-3p		AILANI
RBX1	chebi:CHEBI:30778	gallic acid	INDRA (drugs)
RBX1	chebi:CHEBI:31823	mercury dichloride	INDRA (drugs)
RBX1	chebi:CHEBI:63791	lenalidomide	INDRA (drugs)
RBX1	chebi:CHEBI:74947	2-(2,6-dioxopiperidin-3-yl)-1h-isoindole-1,3(2h)-dione	INDRA (drugs)
RBX1	mirna:hsa-miR-2276-5p		AILANI
RBX1	mirna:hsa-miR-3136-5p		AILANI
RBX1	mirna:hsa-miR-6855-3p		AILANI
RBX1	mirna:hsa-miR-6857-3p		AILANI
RBX1	mirna:hsa-miR-6875-3p		AILANI
RBX1	mirna:hsa-miR-6892-3p		AILANI
RBX1	mirna:hsa-miR-92a-3p		AILANI
RBX1	pubchem.compound:10985033	rcc	INDRA (drugs)
RBX1	mirna:hsa-miR-4439		AILANI
RBX1	mirna:hsa-miR-4513		AILANI
RBX1	mirna:hsa-miR-5187-3p		AILANI
RBX1	mirna:hsa-miR-642a-5p		AILANI
RELA	mirna:hsa-miR-7-5p		AILANI
RELA	mirna:hsa-miR-6859-5p		AILANI
RELA	mirna:hsa-miR-6866-5p		AILANI
RELA	mirna:hsa-miR-6849-3p		AILANI
RELA	mirna:hsa-miR-6077		AILANI
RELA	mirna:hsa-miR-6720-5p		AILANI
RELA	mirna:hsa-miR-8082		AILANI
RELA	mirna:hsa-miR-4534		AILANI
RELA	mirna:hsa-miR-599		AILANI
RELA	mirna:hsa-miR-3916		AILANI
RELA	mirna:hsa-miR-6512-3p		AILANI
RELA	mirna:hsa-miR-3161		AILANI
RELA	mirna:hsa-miR-320a		AILANI
RELA	mirna:hsa-miR-324-5p		AILANI
RELA	mirna:hsa-miR-373-3p		AILANI
RELA	mirna:hsa-miR-877-5p		AILANI
RELA	chebi:CHEBI:16412	lipopolysaccharide	INDRA (drugs)
RELA	mirna:hsa-miR-96-5p		AILANI
RELA	mirna:hsa-miR-3134		AILANI
RELA	chebi:CHEBI:16480	nitric oxide	INDRA (drugs)
RELA	mirna:hsa-miR-1236-3p		AILANI
RELA	chebi:CHEBI:27881	resveratrol	INDRA (drugs)
RELA	chebi:CHEBI:3962	curcumin	INDRA (drugs)
RELA	chebi:CHEBI:7939	parthenolide	INDRA (drugs)
RELA	mirna:hsa-miR-1261		AILANI
RELA	mirna:hsa-miR-124-3p		AILANI
RELA	mirna:hsa-miR-30e-5p		AILANI
RELA	chebi:CHEBI:32816	pyruvic acid	INDRA (drugs)
RELA	chebi:CHEBI:4031	cyclosporin a	INDRA (drugs)
RELA	chebi:CHEBI:52717	bortezomib	INDRA (drugs)
RELA	mirna:hsa-miR-3125		AILANI
RELA	chebi:CHEBI:5001	fenofibrate	INDRA (drugs)
RELA	mirna:hsa-miR-1303		AILANI
RELA	chebi:CHEBI:4806	(-)-epigallocatechin 3-gallate	INDRA (drugs)
SMAD1	chebi:CHEBI:16236	ethanol	INDRA (drugs)
SMAD1	mirna:hsa-miR-205-5p		AILANI
SMAD1	chebi:CHEBI:16796	melatonin	INDRA (drugs)
SMAD1	mirna:hsa-miR-186-5p		AILANI
SMAD1	mirna:hsa-miR-21-3p		AILANI
SMAD1	chebi:CHEBI:78510	dorsomorphin	INDRA (drugs)
SMAD1	mirna:hsa-miR-155-5p		AILANI
SMAD1	mirna:hsa-miR-16-5p		AILANI
SMAD1	chebi:CHEBI:16412	lipopolysaccharide	INDRA (drugs)
SMAD1	chebi:CHEBI:31690	imatinib methanesulfonate	INDRA (drugs)
SMAD1	mirna:hsa-miR-216b-5p		AILANI
SMAD1	mirna:hsa-miR-3117-3p		AILANI
SMAD1	mirna:hsa-miR-30d-5p		AILANI
SMAD1	mirna:hsa-miR-675-3p		AILANI
SMAD1	mirna:hsa-miR-30a-5p		AILANI
SMAD1	mirna:hsa-miR-30c-5p		AILANI
SMAD1	mirna:hsa-miR-30b-5p		AILANI
SMAD1	mirna:hsa-miR-26a-5p		AILANI
SMAD1	mirna:hsa-miR-3591-3p		AILANI
STAT1	chebi:CHEBI:9150	simvastatin	INDRA (drugs)
STAT1	chebi:CHEBI:4806	(-)-epigallocatechin 3-gallate	INDRA (drugs)
STAT1	mirna:hsa-miR-1183		AILANI
STAT1	chebi:CHEBI:30772	butyric acid	INDRA (drugs)
STAT1	mirna:hsa-miR-500a-5p		AILANI
STAT1	chebi:CHEBI:5674	herbimycin	INDRA (drugs)
STAT1	chebi:CHEBI:71200	tofacitinib	INDRA (drugs)
STAT1	chebi:CHEBI:27363	zinc atom	INDRA (drugs)
STAT1	chebi:CHEBI:28197	daidzein	INDRA (drugs)
STAT1	mirna:hsa-miR-203b-3p		AILANI
STAT1	mirna:hsa-miR-501-5p		AILANI
STAT1	mirna:hsa-miR-615-3p		AILANI
STAT1	mirna:hsa-miR-34a-5p		AILANI
STAT1	mirna:hsa-miR-4693-5p		AILANI
STAT1	mirna:hsa-miR-653-5p		AILANI
STAT1	mirna:hsa-miR-7158-3p		AILANI
STAT1	mirna:hsa-miR-145-5p		AILANI
STAT1	mirna:hsa-miR-146a-5p		AILANI
STAT1	mirna:hsa-miR-5009-3p		AILANI
STAT1	mirna:hsa-miR-605-5p		AILANI
STAT1	chebi:CHEBI:16412	lipopolysaccharide	INDRA (drugs)
STAT1	chebi:CHEBI:16243	quercetin	INDRA (drugs)
STAT1	chebi:CHEBI:23359	colchicine	INDRA (drugs)
STAT2	mirna:hsa-let-7a-5p		AILANI
STAT2	mirna:hsa-let-7c-5p		AILANI
STAT2	mirna:hsa-miR-4500		AILANI
STAT2	mirna:hsa-miR-4668-3p		AILANI
STAT2	mirna:hsa-miR-8073		AILANI
STAT2	mirna:hsa-miR-4478		AILANI
STAT2	chebi:CHEBI:81035	ns-5	INDRA (drugs)
STAT2	mirna:hsa-miR-7162-3p		AILANI
STAT2	mirna:hsa-let-7d-5p		AILANI
STAT2	mirna:hsa-let-7b-5p		AILANI
STAT2	mirna:hsa-miR-4695-5p		AILANI
STAT2	mirna:hsa-let-7f-5p		AILANI
STAT2	mirna:hsa-let-7g-5p		AILANI
STAT2	mirna:hsa-let-7e-5p		AILANI
STAT2	mirna:hsa-miR-7160-5p		AILANI
STAT2	mirna:hsa-miR-4482-5p		AILANI
STAT2	mirna:hsa-miR-98-5p		AILANI
STAT2	mirna:hsa-miR-1273e		AILANI
STAT2	mirna:hsa-miR-485-5p		AILANI
STAT2	chebi:CHEBI:73823	arg-val	INDRA (drugs)
STAT2	mirna:hsa-miR-4459		AILANI
STAT2	mirna:hsa-miR-6894-5p		AILANI
STAT2	mirna:hsa-miR-6884-5p		AILANI
STAT2	mirna:hsa-miR-3130-5p		AILANI
STAT2	mirna:hsa-miR-4779		AILANI
STAT2	mirna:hsa-miR-4419b		AILANI
STAT2	mirna:hsa-miR-4458		AILANI
STAT2	chebi:CHEBI:3696	cidofovir anhydrous	INDRA (drugs)
STAT2	chebi:CHEBI:16236	ethanol	INDRA (drugs)
STAT2	mirna:hsa-miR-6840-3p		AILANI
STAT2	mirna:hsa-miR-221-5p		AILANI
STAT2	mirna:hsa-miR-202-3p		AILANI
STAT2	mirna:hsa-miR-371b-5p		AILANI
STAT2	mirna:hsa-miR-373-5p		AILANI
STAT2	mirna:hsa-miR-548c-3p		AILANI
STAT2	chebi:CHEBI:15368	acrolein	INDRA (drugs)
STAT2	mirna:hsa-miR-335-5p		AILANI
STAT2	mirna:hsa-miR-125a-5p		AILANI
STAT2	mirna:hsa-miR-371a-5p		AILANI
STAT2	mirna:hsa-miR-372-5p		AILANI
STAT2	mirna:hsa-miR-3926		AILANI
STAT2	mirna:hsa-miR-3929		AILANI
STAT2	mirna:hsa-miR-3190-5p		AILANI
STAT2	mirna:hsa-miR-665		AILANI
STAT2	mirna:hsa-let-7i-5p		AILANI
STAT2	mirna:hsa-miR-3613-3p		AILANI
STAT2	mirna:hsa-miR-548s		AILANI
STAT2	mirna:hsa-miR-4266		AILANI
STAT2	mirna:hsa-miR-1912		AILANI
STAT2	mirna:hsa-miR-616-5p		AILANI
STAT2	mirna:hsa-miR-1295b-5p		AILANI
STAT3	mirna:hsa-miR-21-5p		AILANI
STAT3	mirna:hsa-miR-3199		AILANI
STAT3	mirna:hsa-miR-337-3p		AILANI
STAT3	mirna:hsa-miR-371b-3p		AILANI
STAT3	mirna:hsa-miR-365b-5p		AILANI
STAT3	mirna:hsa-miR-365a-5p		AILANI
STAT3	mirna:hsa-miR-4270		AILANI
STAT3	mirna:hsa-miR-922		AILANI
STAT3	mirna:hsa-miR-92a-3p		AILANI
STAT3	mirna:hsa-miR-93-5p		AILANI
STAT3	mirna:hsa-miR-548n		AILANI
STAT3	mirna:hsa-miR-618		AILANI
STAT3	mirna:hsa-miR-6754-5p		AILANI
STAT3	mirna:hsa-miR-6760-5p		AILANI
STAT3	mirna:hsa-miR-6875-3p		AILANI
STAT3	mirna:hsa-miR-6878-5p		AILANI
STAT3	mirna:hsa-miR-7110-3p		AILANI
STAT3	mirna:hsa-miR-7113-5p		AILANI
STAT3	mirna:hsa-miR-7151-3p		AILANI
STAT3	mirna:hsa-miR-7158-5p		AILANI
STAT3	mirna:hsa-miR-8052		AILANI
STAT3	mirna:hsa-miR-874-3p		AILANI
STAT3	mirna:hsa-miR-877-3p		AILANI
STAT3	mirna:hsa-miR-6807-5p		AILANI
STAT3	mirna:hsa-miR-6833-3p		AILANI
STAT3	mirna:hsa-miR-6837-5p		AILANI
STAT3	mirna:hsa-miR-6845-3p		AILANI
STAT3	mirna:hsa-miR-6871-3p		AILANI
STAT3	mirna:hsa-miR-6872-3p		AILANI
STAT3	mirna:hsa-miR-17-5p		AILANI
STAT3	mirna:hsa-miR-5095		AILANI
STAT3	mirna:hsa-miR-519d-3p		AILANI
STAT3	mirna:hsa-miR-5581-3p		AILANI
STAT3	mirna:hsa-miR-5681a		AILANI
STAT3	mirna:hsa-miR-6762-3p		AILANI
STAT3	mirna:hsa-miR-6809-3p		AILANI
STAT3	mirna:hsa-miR-6789-3p		AILANI
STAT3	mirna:hsa-miR-106b-5p		AILANI
STAT3	mirna:hsa-miR-1178-3p		AILANI
STAT3	mirna:hsa-miR-1181		AILANI
STAT3	mirna:hsa-miR-1234-3p		AILANI
STAT3	mirna:hsa-miR-124-3p		AILANI
STAT3	mirna:hsa-miR-125b-5p		AILANI
STAT3	mirna:hsa-miR-1288-5p		AILANI
STAT3	mirna:hsa-miR-130b-3p		AILANI
STAT3	mirna:hsa-miR-138-2-3p		AILANI
STAT3	mirna:hsa-miR-155-5p		AILANI
STAT3	mirna:hsa-miR-181a-5p		AILANI
STAT3	mirna:hsa-miR-20a-5p		AILANI
STAT3	mirna:hsa-miR-20b-5p		AILANI
STAT3	mirna:hsa-miR-4438		AILANI
STAT3	mirna:hsa-miR-4441		AILANI
STAT3	mirna:hsa-miR-4684-5p		AILANI
STAT3	mirna:hsa-miR-4685-5p		AILANI
STAT3	mirna:hsa-miR-4720-3p		AILANI
STAT3	mirna:hsa-miR-4778-3p		AILANI
STAT3	mirna:hsa-miR-4804-3p		AILANI
STAT3	mirna:hsa-miR-500b-3p		AILANI
STAT3	mirna:hsa-miR-4516		AILANI
STAT3	chebi:CHEBI:38940	sunitinib	INDRA (drugs)
STAT3	mirna:hsa-miR-4768-5p		AILANI
STAT3	chebi:CHEBI:6801	metformin	INDRA (drugs)
STAT3	chebi:CHEBI:50924	sorafenib	INDRA (drugs)
STAT3	chebi:CHEBI:207229	dihydroartemisinin	INDRA (drugs)
STAT3	chebi:CHEBI:27881	resveratrol	INDRA (drugs)
STAT3	chebi:CHEBI:27899	cisplatin	INDRA (drugs)
STAT3	chebi:CHEBI:91224	s3i-201	INDRA (drugs)
STAT3	chebi:CHEBI:3962	curcumin	INDRA (drugs)
STAT3	chebi:CHEBI:86989	stattic	INDRA (drugs)
STAT3	chebi:CHEBI:4806	(-)-epigallocatechin 3-gallate	INDRA (drugs)
STAT3	mirna:hsa-miR-106a-5p		AILANI
STAT3	mirna:hsa-let-7e-5p		AILANI
TBK1	chebi:CHEBI:27881	resveratrol	INDRA (drugs)
TBK1	chebi:CHEBI:91439	n-[3-[[5-iodo-4-[3-[[oxo(thiophen-2-yl)methyl]amino]propylamino]-2-pyrimidinyl]amino]phenyl]-1-pyrrolidinecarboxamide	INDRA (drugs)
TBK1	mirna:hsa-miR-219a-2-3p		AILANI
TBK1	chebi:CHEBI:17234	glucose	INDRA (drugs)
TBK1	chebi:CHEBI:24261	glucocorticoid	INDRA (drugs)
TBK1	mirna:hsa-miR-1185-1-3p		AILANI
TBK1	mirna:hsa-let-7f-2-3p		AILANI
TBK1	mirna:hsa-miR-200c-3p		AILANI
TBK1	chebi:CHEBI:38940	sunitinib	INDRA (drugs)
TBK1	mirna:hsa-miR-186-5p		AILANI
TBK1	chembl.compound:CHEMBL1567	sunitinib malate	INDRA (drugs)
TBK1	chebi:CHEBI:16113	cholesterol	INDRA (drugs)
TBK1	mirna:hsa-miR-6792-5p		AILANI
TBK1	chebi:CHEBI:31205	amlexanox	INDRA (drugs)
TBK1	mirna:hsa-miR-200b-3p		AILANI
TBK1	mirna:hsa-miR-3674		AILANI
TBK1	mirna:hsa-miR-1185-2-3p		AILANI
TBK1	mirna:hsa-miR-4724-5p		AILANI
TBK1	chebi:CHEBI:124930	n-[3-[[5-cyclopropyl-2-[3-(4-morpholinylmethyl)anilino]-4-pyrimidinyl]amino]propyl]cyclobutanecarboxamide	INDRA (drugs)
TBK1	mirna:hsa-miR-3133		AILANI
TBK1	mirna:hsa-miR-3671		AILANI
TBK1	mirna:hsa-miR-429		AILANI
TBK1	chebi:CHEBI:113532	thymoquinone	INDRA (drugs)
TBK1	mirna:hsa-miR-452-5p		AILANI
TBK1	mirna:hsa-miR-4680-3p		AILANI
TBK1	mirna:hsa-miR-221-3p		AILANI
TBK1	mirna:hsa-miR-219b-3p		AILANI
TBP	mirna:hsa-miR-16-5p		AILANI
TBP	mirna:hsa-miR-615-3p		AILANI
TBP	fplx:Histone	histone	INDRA (drugs)
TBP	chebi:CHEBI:95090	2-(4-methyl-1,4-diazepan-1-yl)-n-[(5-methyl-2-pyrazinyl)methyl]-5-oxo-[1,3]benzothiazolo[3,2-a][1,8]naphthyridine-6-carboxamide	INDRA (drugs)
TBP	chebi:CHEBI:29108	calcium(2+)	INDRA (drugs)
TBP	chebi:CHEBI:15422	atp	INDRA (drugs)
TBP	chebi:CHEBI:16856	glutathione	INDRA (drugs)
TBP	chebi:CHEBI:15351	acetyl-coa	INDRA (drugs)
TCF12	mirna:hsa-miR-211-5p		AILANI
TCF12	mirna:hsa-miR-26b-5p		AILANI
TCF12	chebi:CHEBI:16695	uridine 5'-monophosphate	INDRA (drugs)
TCF12	mirna:hsa-miR-1224-3p		AILANI
TCF12	mirna:hsa-miR-33a-3p		AILANI
TCF12	mirna:hsa-miR-375		AILANI
TCF12	mirna:hsa-miR-548v		AILANI
TCF12	mirna:hsa-miR-8485		AILANI
TCF12	mirna:hsa-miR-139-5p		AILANI
TCF12	mirna:hsa-miR-155-5p		AILANI
TCF12	mirna:hsa-miR-204-5p		AILANI
TICAM1	chebi:CHEBI:16412	lipopolysaccharide	INDRA (drugs)
TICAM1	chebi:CHEBI:27881	resveratrol	INDRA (drugs)
TICAM1	chebi:CHEBI:15756	hexadecanoic acid	INDRA (drugs)
TICAM1	chebi:CHEBI:33351	seaborgium atom	INDRA (drugs)
TICAM1	mirna:hsa-miR-193b-3p		AILANI
TICAM1	chebi:CHEBI:3962	curcumin	INDRA (drugs)
TICAM1	mirna:hsa-miR-221-3p		AILANI
TLR7	mirna:hsa-miR-150-5p		AILANI
TLR7	mirna:hsa-miR-1228-3p		AILANI
TLR7	mirna:hsa-miR-302e		AILANI
TLR7	mirna:hsa-miR-1234-3p		AILANI
TLR7	chebi:CHEBI:5801	hydroxychloroquine	INDRA (drugs)
TLR7	mirna:hsa-miR-302d-3p		AILANI
TLR7	drugbank:DB05475	golotimod	INDRA (drugs)
TLR7	drugbank:DB05127	ana971	INDRA (drugs)
TLR7	mirna:hsa-miR-106b-5p		AILANI
TLR7	mirna:hsa-miR-302b-3p		AILANI
TLR7	mirna:hsa-miR-302c-3p		AILANI
TLR7	mirna:hsa-miR-106a-5p		AILANI
TLR7	mirna:hsa-miR-17-5p		AILANI
TLR7	mirna:hsa-miR-93-5p		AILANI
TLR7	mirna:hsa-miR-7107-5p		AILANI
TLR7	mirna:hsa-miR-758-3p		AILANI
TLR7	mirna:hsa-miR-8087		AILANI
TLR7	mirna:hsa-miR-302a-3p		AILANI
TLR7	chebi:CHEBI:60731	2-thiouridine	INDRA (drugs)
TLR7	drugbank:DB00724	imiquimod	AILANI
TLR7	mirna:hsa-miR-520g-3p		AILANI
TLR7	mirna:hsa-miR-520h		AILANI
TLR7	mirna:hsa-miR-372-3p		AILANI
TLR7	mirna:hsa-miR-373-3p		AILANI
TLR7	mirna:hsa-miR-4731-5p		AILANI
TLR7	mirna:hsa-miR-512-3p		AILANI
TLR7	mirna:hsa-miR-186-3p		AILANI
TLR7	mirna:hsa-miR-20a-5p		AILANI
TLR7	mirna:hsa-miR-20b-5p		AILANI
TLR7	chebi:CHEBI:36706	resiquimod	INDRA (drugs)
TLR7	mirna:hsa-miR-520c-3p		AILANI
TLR7	mirna:hsa-miR-619-5p		AILANI
TLR7	mirna:hsa-miR-520e		AILANI
TLR7	mirna:hsa-miR-526b-3p		AILANI
TLR7	chebi:CHEBI:2981	baicalin	INDRA (drugs)
TLR7	chebi:CHEBI:36704	imiquimod	INDRA (drugs)
TLR7	mirna:hsa-miR-6506-5p		AILANI
TLR7	mirna:hsa-miR-6778-3p		AILANI
TLR7	mirna:hsa-miR-520d-3p		AILANI
TLR7	mirna:hsa-miR-5589-5p		AILANI
TLR7	mirna:hsa-miR-520b		AILANI
TLR7	mirna:hsa-miR-6747-3p		AILANI
TLR7	chebi:CHEBI:27928	parathion	INDRA (drugs)
TLR7	mirna:hsa-miR-586		AILANI
TLR7	mirna:hsa-miR-5089-5p		AILANI
TLR7	chebi:CHEBI:2955	azithromycin	INDRA (drugs)
TLR7	mirna:hsa-miR-520a-3p		AILANI
TLR7	mirna:hsa-miR-519d-3p		AILANI
TLR9	drugbank:DB05530	cpg 10101	INDRA (drugs)
TLR9	chebi:CHEBI:16410	pyridoxamine	INDRA (drugs)
TLR9	chebi:CHEBI:17489	3',5'-cyclic amp	INDRA (drugs)
TLR9	chembl.compound:CHEMBL2103792	agatolimod	INDRA (drugs)
TLR9	drugbank:DB05475	golotimod	INDRA (drugs)
TLR9	chebi:CHEBI:16412	lipopolysaccharide	INDRA (drugs)
TLR9	chebi:CHEBI:3638	chloroquine	INDRA (drugs)
TLR9	chebi:CHEBI:49482	gold(1+)	INDRA (drugs)
TLR9	chebi:CHEBI:5801	hydroxychloroquine	INDRA (drugs)
TLR9	chebi:CHEBI:6809	methamphetamine	INDRA (drugs)
TP53	mirna:hsa-miR-6785-5p		AILANI
TP53	mirna:hsa-miR-6722-3p		AILANI
TP53	mirna:hsa-miR-660-3p		AILANI
TP53	mirna:hsa-miR-6797-5p		AILANI
TP53	mirna:hsa-miR-6760-5p		AILANI
TP53	mirna:hsa-miR-6752-5p		AILANI
TP53	mirna:hsa-miR-6756-5p		AILANI
TP53	mirna:hsa-miR-622		AILANI
TP53	mirna:hsa-miR-6751-5p		AILANI
TP53	mirna:hsa-miR-6133		AILANI
TP53	mirna:hsa-miR-6766-5p		AILANI
TP53	mirna:hsa-miR-125b-5p		AILANI
TP53	mirna:hsa-miR-15a-5p		AILANI
TP53	mirna:hsa-miR-6803-5p		AILANI
TP53	mirna:hsa-miR-1264		AILANI
TP53	mirna:hsa-miR-6129		AILANI
TP53	mirna:hsa-miR-6130		AILANI
TP53	mirna:hsa-miR-608		AILANI
TP53	mirna:hsa-miR-6749-3p		AILANI
TP53	mirna:hsa-miR-4651		AILANI
TP53	chebi:CHEBI:9168	sirolimus	INDRA (drugs)
TP53	mirna:hsa-miR-6127		AILANI
TP53	drugbank:DB08363	1-(9-ethyl-9h-carbazol-3-yl)-n-methylmethanamine	AILANI
TP53	mirna:hsa-miR-6880-5p		AILANI
TP53	mirna:hsa-miR-4682		AILANI
TP53	mirna:hsa-miR-4697-3p		AILANI
TP53	mirna:hsa-miR-4725-3p		AILANI
TP53	mirna:hsa-miR-6825-5p		AILANI
TP53	mirna:hsa-miR-6731-5p		AILANI
TP53	mirna:hsa-miR-612		AILANI
TP53	mirna:hsa-miR-6842-5p		AILANI
TP53	chebi:CHEBI:46742	nutlin-3	INDRA (drugs)
TP53	chebi:CHEBI:7421	nac	INDRA (drugs)
TP53	mirna:hsa-miR-6835-5p		AILANI
TP53	mirna:hsa-miR-605-5p		AILANI
TP53	mirna:hsa-miR-10b-5p		AILANI
TP53	mirna:hsa-miR-1233-5p		AILANI
TP53	chebi:CHEBI:27899	cisplatin	INDRA (drugs)
TP53	mirna:hsa-miR-185-5p		AILANI
TP53	mirna:hsa-miR-18a-5p		AILANI
TP53	mirna:hsa-miR-1909-3p		AILANI
TP53	mirna:hsa-miR-1249-5p		AILANI
TP53	chebi:CHEBI:28748	doxorubicin	INDRA (drugs)
TP53	mirna:hsa-miR-6778-5p		AILANI
TP53	mirna:hsa-miR-6780b-5p		AILANI
TP53	mirna:hsa-miR-3065-5p		AILANI
TP53	mirna:hsa-miR-30a-5p		AILANI
TP53	mirna:hsa-miR-30b-5p		AILANI
TP53	mirna:hsa-miR-30c-5p		AILANI
TP53	mirna:hsa-miR-125a-5p		AILANI
TP53	mirna:hsa-miR-1273f		AILANI
TP53	mirna:hsa-miR-1285-3p		AILANI
TP53	mirna:hsa-miR-5703		AILANI
TP53	mirna:hsa-miR-4434		AILANI
TP53	mirna:hsa-miR-4510		AILANI
TP53	mirna:hsa-miR-1207-5p		AILANI
TP53	mirna:hsa-miR-4531		AILANI
TP53	chebi:CHEBI:46024	trichostatin a	INDRA (drugs)
TP53	mirna:hsa-miR-3529-3p		AILANI
TP53	mirna:hsa-miR-1296-3p		AILANI
TP53	mirna:hsa-miR-16-5p		AILANI
TP53	mirna:hsa-miR-17-5p		AILANI
TP53	mirna:hsa-miR-4419a		AILANI
TP53	mirna:hsa-miR-4728-5p		AILANI
TP53	mirna:hsa-miR-4736		AILANI
TP53	mirna:hsa-miR-4763-3p		AILANI
TP53	mirna:hsa-miR-4795-5p		AILANI
TP53	mirna:hsa-miR-454-3p		AILANI
TP53	mirna:hsa-miR-4644		AILANI
TP53	mirna:hsa-miR-4650-5p		AILANI
TP53	mirna:hsa-miR-375		AILANI
TP53	mirna:hsa-miR-4271		AILANI
TP53	mirna:hsa-miR-4286		AILANI
TP53	mirna:hsa-miR-4306		AILANI
TP53	mirna:hsa-miR-27a-3p		AILANI
TP53	chebi:CHEBI:16981	o-(3-o-d-galactosyl-n-acetyl-beta-d-galactosaminyl)-l-serine	INDRA (drugs)
TP53	chebi:CHEBI:17234	glucose	INDRA (drugs)
TP53	chebi:CHEBI:22977	cadmium atom	INDRA (drugs)
TP53	mirna:hsa-miR-485-5p		AILANI
TP53	mirna:hsa-miR-491-5p		AILANI
TP53	mirna:hsa-miR-5003-5p		AILANI
TP53	mirna:hsa-miR-223-3p		AILANI
TP53	mirna:hsa-miR-25-3p		AILANI
TP53	mirna:hsa-miR-5702		AILANI
TP53	chebi:CHEBI:27881	resveratrol	INDRA (drugs)
TP53	mirna:hsa-miR-106a-5p		AILANI
TP53	mirna:hsa-miR-106b-5p		AILANI
TP53	mirna:hsa-miR-149-3p		AILANI
TP53	mirna:hsa-miR-150-5p		AILANI
TP53	mirna:hsa-miR-194-3p		AILANI
TP53	mirna:hsa-miR-1972		AILANI
TP53	mirna:hsa-miR-19a-3p		AILANI
TP53	mirna:hsa-miR-19b-3p		AILANI
TP53	mirna:hsa-miR-214-3p		AILANI
TP53	mirna:hsa-miR-221-3p		AILANI
TP53	mirna:hsa-miR-5197-5p		AILANI
TP53	mirna:hsa-miR-5693		AILANI
TP53	mirna:hsa-miR-30d-5p		AILANI
TP53	mirna:hsa-miR-324-5p		AILANI
TP53	mirna:hsa-miR-34a-5p		AILANI
TP53	mirna:hsa-miR-4516		AILANI
TP53	mirna:hsa-miR-504-5p		AILANI
TP53	mirna:hsa-miR-513b-3p		AILANI
TP53	mirna:hsa-miR-5193		AILANI
TP53	mirna:hsa-miR-222-3p		AILANI
TP53	mirna:hsa-miR-5196-3p		AILANI
TP53	mirna:hsa-miR-200a-3p		AILANI
TP53	mirna:hsa-miR-20a-5p		AILANI
TP53	mirna:hsa-miR-2110		AILANI
TP53	mirna:hsa-miR-30e-5p		AILANI
TP53	mirna:hsa-miR-3165		AILANI
TP53	mirna:hsa-miR-6882-5p		AILANI
TP53	mirna:hsa-miR-6883-5p		AILANI
TP53	mirna:hsa-miR-7110-5p		AILANI
TP53	mirna:hsa-miR-7150		AILANI
TP53	mirna:hsa-miR-92a-3p		AILANI
TP53	mirna:hsa-miR-937-5p		AILANI
TP53	mirna:hsa-miR-92a-2-5p		AILANI
TP53	mirna:hsa-miR-8071		AILANI
TP53	mirna:hsa-miR-8085		AILANI
TP53	mirna:hsa-miR-92a-1-5p		AILANI

## Sheet: S9
gene	tvar	CAP_PKB	CAP_PKB_male	CAP_PKB_female	CAP_PKB_afr	CAP_PKB_afr_male	CAP_PKB_afr_female	CAP_PKB_amr	CAP_PKB_amr_male	CAP_PKB_amr_female	CAP_PKB_fin	CAP_PKB_fin_male	CAP_PKB_fin_female	CAP_PKB_asj	CAP_PKB_asj_male	CAP_PKB_asj_female	CAP_PKB_nfe	CAP_PKB_nfe_male	CAP_PKB_nfe_female	CAP_PKB_eas	CAP_PKB_eas_male	CAP_PKB_eas_female	CAP_PKB_sas	CAP_PKB_sas_male	CAP_PKB_sas_female	nvar	nvar_male	nvar_female	nvar_afr	nvar_afr_male	nvar_afr_female	nvar_amr	nvar_amr_male	nvar_amr_female	nvar_fin	nvar_fin_male	nvar_fin_female	nvar_asj	nvar_asj_male	nvar_asj_female	nvar_nfe	nvar_nfe_male	nvar_nfe_female	nvar_eas	nvar_eas_male	nvar_eas_female	nvar_sas	nvar_sas_male	nvar_sas_female
ABCC1	2435	7460333	7616434	7275041	219512	2093843	2262219	3417767	3675511	3235556	11721366	11777224	11660453	6351897	6717222	5963963	10933462	10959904	10899842	11124	22608	0	3164324	3200061	3054866	1	1	1	1	1	1	1	1	1	1	1	1	1	1	1	1	1	1	1	1	0	1	1	1
ABCC4	1814	25765007	25859308	25653914	32606787	32350862	3276386	31142302	30406062	31658369	14966603	15522145	14359372	25491748	26234246	24702738	16828961	17326776	16194363	47014995	46465349	47544776	39720494	38640353	4292849	2	3	3	3	3	3	3	3	3	3	3	3	3	3	3	3	3	3	3	3	3	3	3	3
ABCG2	1069	99852799	99794711	99900724	84105218	84641852	83766944	99999767	99999744	99999782	98871559	98773793	98969217	98102454	98266068	97913087	99049541	98941496	99171214	99999999	99999999	99999999	996025	99515201	99784506	4	28	28	27	27	27	28	27	28	27	27	27	27	27	27	27	27	27	26	26	26	25	25	25
ADA	823	35650725	35581237	35732521	66586282	66930945	66373339	35121002	35077338	35151768	28087734	28862921	27240465	33808758	33465309	34170793	31732416	32028879	31355295	26507957	26335887	26675031	42839898	43026035	42268269	1	1	1	1	1	1	1	1	1	1	1	1	1	1	1	1	1	1	1	1	1	1	1	1
ADRB2	368	99857601	99846149	99870065	9997683	99974237	99978309	99949416	99946459	99951415	99813885	99815885	99811688	99850256	99857913	99841861	99568529	99568888	99568116	99995081	99994738	99995398	99940198	99935311	99953119	3	9	9	9	9	9	9	9	9	9	9	9	9	9	9	9	9	9	9	9	7	9	9	9
AGTR1	319	98036082	97927976	98158087	64025003	64109024	63981964	99403952	99406381	99402655	9787672	97881651	97871701	99111824	9911509	99108341	99118945	99101028	99141318	9505255	94906631	9519057	89812223	90019399	89156987	3	7	7	6	6	6	6	6	6	6	6	6	6	6	6	7	6	7	7	7	7	7	7	7
AHR	893	328262	304444	356268	0	0	0	0	0	0	0	0	0	0	0	0	0	0	0	4174715	4170075	4179238	137145	129986	159046	1	1	1	0	0	0	0	0	0	0	0	0	0	0	0	0	0	0	1	1	1	1	1	1
AMPD1	1184	3022253	30563749	29819285	7782684	7782646	7782722	18288798	1881771	17913441	38865754	38451819	39313086	27033923	27458303	26583449	42492888	42285779	42755004	21747	0	42884	13363387	13854623	11847779	1	2	2	2	2	2	2	2	2	2	2	2	2	2	2	2	2	2	2	0	2	2	2	2
APOB	4411	50045496	51142137	48740557	27531215	2820844	27113484	44906494	43266867	460498	45534272	45564526	45501204	35349717	35324145	35376891	3821254	38344054	38045785	92442559	92519775	92367157	75280111	74028542	78918036	1	1	1	1	1	1	1	1	1	1	1	1	1	1	1	1	1	1	1	1	1	1	1	1
APOE	655	96214198	96032444	96420569	99649531	9959924	99679171	88646004	89234293	88194939	98767026	98760817	98769658	95574416	95603037	95543326	97519349	97526964	97509827	92134462	92226173	92036858	89887845	90170561	88955794	2	15	15	15	15	15	15	15	15	15	15	15	15	15	15	15	15	15	15	15	15	15	15	15
ATIC	1169	80177894	816613	78319792	35197102	35299574	35114083	80090348	79883935	8023701	72480507	73674975	71243276	81881732	82052874	81693827	79737683	79928523	7949995	76113097	76733765	75475784	92574107	92311859	93332964	2	2	2	2	2	2	2	2	2	2	2	2	2	2	2	2	2	2	2	2	2	2	2	2
ATM	3959	38273179	38965528	3745126	8756397	7724212	9386049	2233894	21878614	22662825	66965142	66457656	67510593	42419419	43159591	41627979	46182984	46307537	46024722	2504465	2149163	2848912	27469432	2785597	26276726	1	2	2	2	2	2	2	2	2	2	2	2	2	2	2	2	2	2	2	2	2	2	2	2
BCL2	230	3525016	4071394	2841838	259034	259909	258453	9762	79286	110381	0	0	0	0	0	0	60929	56695	66614	18613422	18049311	19146454	15404651	15164903	16182734	1	1	1	1	1	1	1	1	1	0	0	0	0	0	0	1	1	1	1	1	1	1	1	1
BDKRB2	462	95638045	95426663	95884275	87108784	83314098	89167298	96794743	96613914	96913721	95300941	95648489	94962379	94465224	941931	94771839	96150798	96309029	95952014	9814401	98018852	9826216	93185319	93173667	93227371	1	3	3	3	3	3	3	3	3	3	3	3	3	3	3	3	3	3	3	3	3	3	3	3
BDNF	481	35177695	35760416	34489107	6557927	5860446	6985201	28109272	27841431	28298226	28127246	2814454	28108424	38574534	38974218	38150741	34418347	34624528	3415635	74150199	74867425	73443499	34967388	35234847	34145801	1	1	1	1	1	1	1	1	1	1	1	1	1	1	1	1	1	1	1	1	1	1	1	1
BRAF	942	7.96E-06	1.47E-05	0	0	0	0	0	0	0	0	0	0	0	0	0	0	0	0	0	0	0	6.53E-05	8.67E-05	0	1	1	0	0	0	0	0	0	0	0	0	0	0	0	0	0	0	0	0	0	0	1	1	0
C5	2178	65203	48554	84783	0	0	0	17346	13966	19735	27714	35477	19278	0	0	0	7.03E-05	6.29E-05	7.97E-05	781417	616738	941372	0	0	0	1	1	1	0	0	0	1	1	1	1	1	1	0	0	0	1	1	1	1	1	1	0	0	0
CASP7	655	83765	83489276	84084283	59701927	58106093	60657048	85484074	85419078	85529788	85768026	85787633	85746623	72548284	73056125	72002183	83321248	82853775	83898928	96272417	96326992	96218735	80362615	80332305	80455006	1	3	3	3	3	3	3	3	3	3	3	3	3	3	3	3	3	3	3	3	3	3	3	3
CCND1	835	91033576	91759582	90118143	61970337	6241142	61697443	84794169	84943421	84688017	93036112	93274876	92769373	90715413	90562289	90875302	91891666	91988055	91768007	96541625	9647754	96603153	94790943	94839186	94641108	1	2	2	2	2	2	2	2	2	2	2	2	2	2	2	2	2	2	2	2	2	2	2	2
CDA	211	96778179	96831343	9671554	91837156	91418544	92085444	97000301	97225041	96831809	94449325	94432581	94467488	98897884	98864744	98932349	98326937	98341937	98307892	84356121	84234511	84474172	93695694	93861194	93167413	3	7	7	7	7	7	7	5	7	5	5	5	5	5	5	7	7	5	7	7	7	7	7	5
CMPK1	214	72150105	71387771	73083826	95229751	95664485	94946496	7957891	79180582	79851483	57326313	57952686	56695967	58269046	57892749	58709608	70567096	70315482	70912962	80814023	81063752	80568831	70708632	70805106	7039726	1	1	1	1	1	1	1	1	1	1	1	1	1	1	1	1	1	1	1	1	1	1	1	1
COMT	1355	98925199	99001424	98828434	93093549	92690307	93333413	97247207	97344183	97176835	99617133	99598718	99636645	99286132	99269807	99303707	9955034	99535394	99568944	93160552	92848162	9345365	98577522	98653693	98320661	2	4	4	4	4	4	4	4	4	4	4	4	4	4	4	4	4	4	4	4	4	4	4	4
DCK	386	380727	288731	489019	5281967	5831122	4944305	208393	139831	256829	0	0	0	0	0	0	8.82E-05	9.45E-05	8.01E-05	0	0	0	19633	8.68E-05	53114	1	1	1	1	1	1	1	1	1	0	0	0	0	0	0	1	1	1	0	0	0	1	1	1
DCTD	340	94612	104444	83048	49207	32328	59574	5.78E-05	0	9.87E-05	18477	35477	0	0	0	0	193283	210547	171385	0	0	0	0	0	0	1	1	1	1	1	1	1	0	1	1	1	0	0	0	0	1	1	1	0	0	0	0	0	0
DRD2	573	65320857	67035293	6324864	21639972	2163767	21641388	445754	46302028	433384	70640508	7012186	71199068	79003626	78802355	79215519	79146256	79100839	79203755	1103964	11121659	10959904	61377255	62381282	58224331	1	1	1	1	1	1	1	1	1	1	1	1	1	1	1	1	1	1	1	1	1	1	1	1
EDN1	317	79041208	80650916	77006841	71758511	69917367	72842194	61624572	62900063	60701701	71767296	70628223	72963057	75950232	75195253	767273	76525924	76726588	76269404	86151973	8626617	86040242	95418489	95097373	96293881	1	3	3	3	3	3	3	3	3	3	3	3	3	3	3	3	3	3	3	3	3	3	3	3
EDNRA	405	48330356	47936127	48792093	821082	82217501	82040797	54413062	54751911	54172787	30660904	30580276	30748477	51235337	50660895	51838204	42425139	42787719	41963029	36183229	36152229	36213422	57777815	57354137	5905779	1	1	1	1	1	1	1	1	1	1	1	1	1	1	1	1	1	1	1	1	1	1	1	1
EGFR	1981	15383148	15225903	15567907	36851957	36253221	37218844	947239	9457867	948266	13965415	13558837	14406269	9825376	10043197	9594836	14138534	13987316	14330124	12268603	11889488	12636451	19180979	19397491	18517189	2	3	3	3	3	3	3	1	3	1	1	1	1	1	1	3	3	3	1	1	1	1	1	1
ERBB2	1990	35415471	35682166	35101347	7896209	7360145	822475	28949093	28223013	29459823	50105838	49862979	50368961	27059689	26540016	2760747	42159716	41625663	42833698	22576015	23307069	21862356	2879695	29387574	26974772	1	1	1	1	1	1	1	1	1	1	1	1	1	1	1	1	1	1	1	1	1	1	1	1
F10	913	24201559	25701806	223876	23160575	23156893	23162679	19798841	19602954	19937054	13571648	12725952	144919	34479555	34536043	34418995	21635722	21988887	21173481	987154	10175819	9573803	48267512	48002489	49074507	1	1	1	1	1	1	1	1	1	1	1	1	1	1	1	1	1	1	1	1	1	1	1	1
F2	992	37865878	36575819	39366836	5773355	5705355	5815129	64011759	61736868	65578194	4261786	42464741	42783937	14602607	14776454	14418629	24079797	24106457	24045812	84532691	84638068	84429873	36246482	36698563	34853955	1	1	1	1	1	1	1	1	1	1	1	1	1	1	1	1	1	1	1	1	1	1	1	1
F5	2329	1264548	1279309	12471738	1788632	1739378	1818863	18228564	1839754	1810912	16362775	16064371	16686425	13485632	12984965	14013771	12167772	12244773	12070052	5967183	6064109	5872962	14267012	1419357	14491437	1	1	1	1	1	1	1	1	1	1	1	1	1	1	1	1	1	1	1	1	1	1	1	1
F7	815	24201559	25701806	223876	23160575	23156893	23162679	19798841	19602954	19937054	13571648	12725952	144919	34479555	34536043	34418995	21635722	21988887	21173481	987154	10175819	9573803	48267512	48002489	49074507	1	1	1	1	1	1	1	1	1	1	1	1	1	1	1	1	1	1	1	1	1	1	1	1
FCGR2A	1116	97922011	97800023	98058238	99134418	99115777	99145703	98735801	98677197	98775886	98211882	98189633	98235812	95564708	954942	95638265	98374052	98340902	98415282	90651681	90707988	90596512	96061512	9612537	95860684	1	3	3	3	3	3	3	3	3	3	3	3	3	3	3	3	3	3	3	3	3	3	3	3
FGFR4	1453	54722039	5446868	5502098	24423927	23509058	24987079	66412643	65529598	6703001	54392669	53816559	55015749	53691975	51969001	55490821	51163663	51048568	51311005	69702902	69083731	70301642	58014913	58221099	57380907	1	1	1	1	1	1	1	1	1	1	1	1	1	1	1	1	1	1	1	1	1	1	1	1
FLT4	2267	29476818	30201924	28611384	15023097	14729284	15204204	18284078	201461	16948446	32119303	31610768	32670396	36033847	36741606	35274524	38692288	38530614	38899972	250538	154666	343792	23824888	23861429	23713603	2	2	2	2	2	2	2	2	2	2	2	2	2	2	2	2	2	2	2	2	2	2	2	2
GGCX	1391	79515946	78984524	80129847	94675075	94927384	94514705	64636015	65619739	63927459	83189064	83740309	82571978	73149578	73095416	73208029	84129185	83981094	84317522	78542178	79009645	78080149	56071542	5724179	52332708	3	4	4	4	4	4	4	4	4	4	4	4	4	4	4	4	4	4	2	2	2	4	4	4
GLA	326	3.27E-05	0	5.19E-05	0	0	0	0	0	0	0	0	0	0	0	0	7.33E-05	0	11966	0	0	0	0	0	0	2	0	2	0	0	0	0	0	0	0	0	0	0	0	0	2	0	2	0	0	0	0	0	0
GRIN2B	1198	53256935	5377727	52640691	18833144	18836712	18830946	54939256	54393614	55322807	60586842	60035098	61181368	5548495	55684218	55273599	46865814	46633469	47160331	77200521	77556283	7685197	66042109	65234826	68452569	1	1	1	1	1	1	1	1	1	1	1	1	1	1	1	1	1	1	1	1	1	1	1	1
GSTP1	404	99977275	99969928	99983795	99999319	9999904	99999459	99999958	99999947	99999964	99849348	9986217	99834025	99225712	99225026	99226429	99973982	99972854	99975352	97982264	98185463	97764664	99900212	99900699	99898704	2	11	11	11	11	11	11	11	11	11	11	11	11	11	11	11	11	11	11	11	11	11	11	11
HIF1A	901	16840574	17700649	15823284	7127132	7142204	7117881	1219135	12540938	1194396	763729	7585059	769408	29715083	29284178	30169409	20089094	20450369	19629671	8384493	8671683	8104923	20932158	21175967	2018418	1	1	1	1	1	1	1	1	1	1	1	1	1	1	1	1	1	1	1	1	1	1	1	1
HNF4A	897	349893	237381	484939	4969536	4561579	5224187	250725	257862	245625	0	0	0	0	0	0	1.94E-05	3.41E-05	0	0	0	0	0	0	0	1	1	1	1	1	1	1	1	1	0	0	0	0	0	0	1	1	0	0	0	0	0	0	0
IGFBP3	441	61859371	62636855	60771198	52423252	5279623	52153728	4127368	41751965	40941851	61650095	63287428	60153859	73466581	74342432	7235985	66521973	66843133	66065064	95268896	95299169	95238789	57914679	57636694	59048704	1	1	1	1	1	1	1	1	1	1	1	1	1	1	1	1	1	1	1	1	1	1	1	1
IKBKE	925	35893236	3551653	3633524	7035654	7489325	6756469	46623679	45892501	47136776	45149387	45494117	44773254	26866375	28540874	25075568	39549686	40092864	38855889	38526717	38765149	38294262	16184895	16438316	15407833	1	1	1	1	1	1	1	1	1	1	1	1	1	1	1	1	1	1	1	1	1	1	1	1
IMPDH1	926	46931252	46698173	47204663	36246003	36898425	35844065	47043233	46961407	47100853	54412927	53853792	55016017	52592782	52448632	52744962	45141536	45022669	45292232	60084771	6044307	59734757	43128493	42711601	44394493	1	1	1	1	1	1	1	1	1	1	1	1	1	1	1	1	1	1	1	1	1	1	1	1
IMPDH2	1689	50188496	50430232	49902838	15304093	13603113	163341	32580979	32399227	32709206	6306135	62929278	6320502	64227038	63569331	64910825	59728468	59414083	60124177	2658701	24300451	28750727	37432651	37098026	38446405	1	4	4	4	4	4	4	4	4	4	4	4	4	4	4	4	4	4	4	4	4	4	4	4
ITGA2	1696	98007283	97979922	98039006	94296131	94365306	94253315	99245335	99215097	99266024	98239661	98163519	9831931	97766592	97833755	97693686	98273317	9828019	98264564	9423379	94625386	93829702	97268524	97284914	97217841	2	4	4	4	4	4	4	4	4	4	4	4	4	4	4	4	4	4	4	4	4	4	4	4
ITGB3	1273	40318072	40782787	3976753	36050414	37347946	35243401	27320491	28325906	26603719	46572494	46162875	47015304	49591909	48734117	50485421	48774819	48811139	48728543	1104571	1229673	982845	33512907	32800567	35657053	1	2	2	2	2	2	2	2	2	2	2	2	2	2	2	2	2	2	2	2	2	2	2	2
ITPA	758	81652902	82205393	80985012	70313143	70915588	69938589	63021411	6344817	62717538	72968212	71947496	74038674	78630059	79318573	77880048	87668928	87416358	87982503	84696337	84813153	84581802	79419324	79935208	77763526	2	10	10	10	10	10	10	10	10	10	10	10	10	10	10	10	10	10	10	5	10	10	10	10
KDR	1781	71854748	71962109	71728779	84212521	84527317	84016625	47511373	48921143	4649843	76784994	76600781	7698753	69007745	70275877	67618398	72591937	730207	72039204	89426439	89588258	89267077	65705659	64589356	68934905	3	6	6	6	6	6	6	6	6	6	6	6	6	6	6	6	6	6	4	4	4	6	6	6
LPL	778	32072702	32556644	31500365	25692767	26074049	25457766	20345886	20131442	20497141	30883312	30961174	30798646	35763025	35464589	36077584	34800481	34810058	34788581	38017624	38383135	37660872	33262744	32831853	34567695	1	2	2	2	2	2	2	2	2	2	2	2	2	2	2	2	2	2	2	2	2	2	2	2
LTA	485	82297804	82811559	81662599	82905468	81218949	83978453	57580435	59957828	55748912	83259591	84124825	82346261	6701	68129611	65721578	91769258	91948807	91542313	73139388	74278098	7191202	66933929	6736066	65616526	1	7	7	7	7	7	7	7	7	7	7	7	7	7	7	7	7	7	7	7	7	7	7	7
NCOA1	1361	3349158	3516765	3151865	712397	6778	733651	2710796	2980672	2519942	11608	1132133	1191953	2562727	2493914	2635463	5180373	5232929	5113698	10874	0	21444	2383525	2584324	1768358	1	1	1	1	1	1	1	1	1	1	1	1	1	1	1	1	1	1	1	0	1	1	1	1
NR1I2	753	80811696	80479576	81197197	941393	93989965	94231478	76385088	76252507	76478187	83293713	83440666	83132746	70474779	70595219	70347038	70763237	70921213	70561868	97652873	9762372	97680945	85801613	8560994	8637494	2	4	4	4	4	4	4	4	4	3	3	3	4	4	4	4	4	4	3	3	3	4	4	4
NR1I3	1085	58348595	58674131	57963839	25722147	25125937	2608712	62262568	62392198	62170858	53073938	52880699	53283595	54771281	55263165	54248439	57411063	57283318	57572754	77577502	77294203	77851117	63416011	62916406	64922928	1	1	1	1	1	1	1	1	1	1	1	1	1	1	1	1	1	1	1	1	1	1	1	1
NR3C1	700	25833264	25022011	26779576	46421934	47685174	45634591	13620051	14249702	13173813	38798231	39234556	38321727	13606786	13508568	13710466	29219064	29086903	29386936	25369168	24609801	2610184	8246967	8068983	8789679	2	2	2	2	2	2	2	2	2	2	2	2	1	1	1	2	2	2	2	2	2	2	2	2
OPRM1	1444	92709815	93292068	91964204	83489035	82478968	84130504	94835211	94917256	94776475	93214714	93725792	92613385	92450939	9254904	92346794	80386651	80642731	80056402	99626754	99605867	99646027	99564637	99478726	99753465	3	10	10	10	10	10	10	10	10	7	7	7	10	10	10	10	10	10	10	6	10	10	10	10
P2RY12	1454	50255614	50485416	49984694	33100851	33341756	32952889	54030922	54006375	54048142	60184657	60625755	59702769	35522473	34688873	36398258	52024845	51732383	52394416	40476615	40812674	40148734	50134512	50587676	48735832	1	1	1	1	1	1	1	1	1	1	1	1	1	1	1	1	1	1	1	1	1	1	1	1
POLG	2312	16896919	17149899	1659837	3475596	3606491	3395105	8710083	8833361	8622886	32004447	32639843	31309476	20236379	19812273	20684638	22673252	22592683	22775331	43486	66165	2144	7186263	7576592	598489	2	2	2	2	2	2	2	2	2	2	2	2	2	2	2	2	2	2	2	2	1	2	2	2
PPARG	587	52969733	53373092	52491801	19014192	19328641	18821182	52484486	51501241	53168833	68783101	69081086	68456899	3198228	3174832	32229294	54940886	54333169	5570192	50748822	50980532	50523765	55677511	56068044	54470377	2	3	3	3	3	3	3	3	3	3	3	3	3	3	3	3	3	3	3	3	3	3	3	3
PRCP	1566	28671841	29463182	27735039	22780722	2200867	2325364	18434157	19198059	17892552	27947405	27890352	28009357	35581558	35302429	35875459	32077513	32526918	3150501	20654662	20313134	20985501	32032012	31367888	3404676	1	1	1	1	1	1	1	1	1	1	1	1	1	1	1	1	1	1	1	1	1	1	1	1
PTGS2	614	3011563	3169758	2825272	17024037	15724738	1781467	103665	779722	1217882	0	0	0	0	0	0	63287	62882	63801	43485	88212	0	12829176	12728344	1313705	1	2	2	2	2	2	2	2	2	0	0	0	0	0	0	2	2	2	2	2	0	2	2	2
RRM1	978	70961373	7129205	70568507	26496984	25179403	2730272	71179315	72081458	70530411	71610711	71231366	72021296	75394531	75707818	75062561	7874163	787479	78733791	60826546	60430994	61210646	5987411	5972308	6033507	1	1	1	1	1	1	1	1	1	1	1	1	1	1	1	1	1	1	1	1	1	1	1	1
RRM2	528	2585044	1964393	3311321	3124201	32599561	30397777	1531635	1584679	1494127	0	0	0	0	0	0	91445	106922	71811	0	0	0	104575	10409	106059	1	2	2	2	2	2	2	2	2	0	0	0	0	0	0	2	2	2	0	0	0	2	2	2
RYR1	7805	405516	422212	385715	98528	0	159129	202287	153532	236747	16617	318833	0	178739	270184	81616	637198	624721	652704	228132	198365	257103	234943	207884	317709	16	50	45	8	0	8	5	3	3	12	12	0	3	3	1	44	38	28	16	7	10	12	8	11
SCARB1	881	19424243	19065687	19861696	14991858	13484014	15834843	22572847	23923402	21590746	13731273	1373718	13725811	31683659	31307896	32136345	22810948	22445029	23264853	6982	0	142197	13367651	13542863	12771442	1	1	1	1	1	1	1	1	1	1	1	1	1	1	1	1	1	1	1	0	1	1	1	1
SERPINA5	1187	59705883	56428324	63298248	99058461	98961585	99114278	48933528	49131298	48793198	50714846	50358889	51099331	1693168	17272922	16570504	46928254	46331623	47678183	85959943	86000228	85920667	45233074	4469981	46837597	3	3	3	3	3	3	3	3	3	3	3	3	3	3	3	3	3	3	3	3	3	3	3	3
SERPINC1	471	64183486	63467405	65016797	95021836	94892671	95100373	5593762	56628951	55445843	48636691	48680399	48589092	78298098	77722922	78897828	56540262	57060812	55875201	89161485	89519435	88807697	6156682	61810196	60817283	1	1	1	1	1	1	1	1	1	1	1	1	1	1	1	1	1	1	1	1	1	1	1	1
SERPINE1	547	18133479	18835396	17304075	3548607	2984178	3894584	13459233	13736604	13262983	13194629	13459047	12906926	22736779	22419841	23070787	21334985	21362301	21300391	17038725	16748974	17319915	21084494	21325584	2034491	1	1	1	1	1	1	1	1	1	1	1	1	1	1	1	1	1	1	1	1	1	1	1	1
SOD2	1234	99497031	99494554	99499948	9880849	98913947	98738985	99958953	9995507	99961521	99398629	99351475	99446835	99683842	9970406	99660971	99588529	9958291	99595592	69231773	70058161	68409439	99714238	99695623	99765234	1	4	4	4	4	4	4	4	4	4	4	4	4	4	4	4	4	4	4	4	4	4	4	4
TGFB1	1714	10975567	11492547	10360498	12550215	12125406	12818788	6700358	7004779	6476981	6828278	676543	6893615	7854841	847628	7153074	14102786	14035913	14182899	163629	178301	148368	15053695	15182421	14660391	1	1	1	1	1	1	1	1	1	1	1	1	1	1	1	1	1	1	1	1	1	1	1	1
TLR3	799	48040699	48191099	47863369	12522083	11433023	13192691	50825545	50956871	50732516	54436555	54332004	54550155	44625268	44873681	44361529	50674381	5058627	50786267	56500831	56647915	56357857	42001114	42059283	41822922	1	1	1	1	1	1	1	1	1	1	1	1	1	1	1	1	1	1	1	1	1	1	1	1
TLR4	665	31247172	32269452	30028647	36616321	35376538	3736828	16196742	1575748	16505732	48442864	48609839	48260887	33533484	36622927	30130532	28670062	28122094	29360138	195663	132378	257124	51612989	50239856	55617933	1	3	3	3	3	3	3	3	3	3	3	3	3	3	3	3	3	3	3	3	3	3	3	3
TNF	862	82297804	82811559	81662599	82905468	81218949	83978453	57580435	59957828	55748912	83259591	84124825	82346261	6701	68129611	65721578	91769258	91948807	91542313	73139388	74278098	7191202	66933929	6736066	65616526	1	7	7	7	7	7	7	7	7	7	7	7	7	7	7	7	7	7	7	7	7	7	7	7
TOMM40	1090	90793371	90380908	91262595	98265639	98046833	98393965	82312096	82858746	81901501	97635594	9750472	9775323	85833931	86504919	85042001	92594435	92633376	92545486	76855214	76666947	77046929	81589673	82115552	79854329	1	8	8	8	8	8	8	8	8	8	8	8	8	8	8	8	8	8	8	8	8	8	8	8
TYMS	647	61480475	61521302	61432174	80113395	80720524	79734697	5444452	53842923	54872104	52411112	52043544	52809145	61836517	6238349	61250993	53278947	53940296	52429322	90520128	90674122	90369529	69219363	68824416	70404768	1	1	1	1	1	1	1	1	1	1	1	1	1	1	1	1	1	1	1	1	1	1	1	1
UMPS	1714	89342292	88883961	8986784	78700649	78984248	78528976	97395355	97312605	97452543	87931138	88070984	87780268	84965175	85197744	84720405	86384794	86290904	8650185	93033978	93021761	93045941	88398873	88357556	88525637	2	3	3	3	3	3	3	3	3	3	3	3	3	3	3	3	3	3	3	3	3	3	3	3
VDR	693	54725807	55979031	53228626	47549815	47831738	47376292	3799288	39582181	36857906	5509097	55272127	54893195	58959577	5919039	58714749	64205506	63991359	64476374	10509724	10489252	10529608	58006101	57940235	58207137	1	1	1	1	1	1	1	1	1	1	1	1	1	1	1	1	1	1	1	1	1	1	1	1
VEGFA	650	8689449	86949763	86826883	55598781	55926524	55341373	89369872	89653087	89172105	88639586	88866259	88385294	89523677	89104131	89960211	88911188	88725177	89165998	81323465	80718619	81900996	85006487	84795492	85653949	2	5	5	5	5	5	5	5	5	5	5	5	5	5	5	5	5	5	5	5	5	5	5	5
